# Supplementary material for: Osseointegrated reconstruction and rehabilitation of transtibial amputees: the Osseointegration Group of Australia surgical technique and protocol for a prospective cohort study
Source: PubMed Central journal article supplement — BMJ Open. 2020 Oct 20;10(10):e038346. doi: 10.1136/bmjopen-2020-038346 (PMC7577069; doi:10.1136/bmjopen-2020-038346), 2020-10-20
Supplement: bmjopen-2020-038346.draft_revisions.pdf [file bmjopen-2020-038346.draft_revisions.pdf]

# BMJ Open

BMJ Open is committed to open peer review. As part of this commitment we make the peer review history of every article we publish publicly available.

When an article is published we post the peer reviewers' comments and the authors' responses online. We also post the versions of the paper that were used during peer review. These are the versions that the peer review comments apply to.

The versions of the paper that follow are the versions that were submitted during the peer review process. They are not the versions of record or the final published versions. They should not be cited or distributed as the published version of this manuscript.

BMJ Open is an open access journal and the full, final, typeset and author-corrected version of record of the manuscript is available on our site with no access controls, subscription charges or pay-per-view fees (<http://bmjopen.bmj.com>).

If you have any questions on BMJ Open's open peer review process please email [info.bmjopen@bmj.com](mailto:info.bmjopen@bmj.com)

# BMJ Open

## Osseointegrated Reconstruction and Rehabilitation of Transtibial Amputees: the Osseointegration Group of Australia surgical technique and protocol for a prospective cohort study

|                               |                                                                                                                                                                                                                                                                                                                                                                                                                                                                                                                                                                                                                                                                                                                                                                                                                                                                                                                          |
|-------------------------------|--------------------------------------------------------------------------------------------------------------------------------------------------------------------------------------------------------------------------------------------------------------------------------------------------------------------------------------------------------------------------------------------------------------------------------------------------------------------------------------------------------------------------------------------------------------------------------------------------------------------------------------------------------------------------------------------------------------------------------------------------------------------------------------------------------------------------------------------------------------------------------------------------------------------------|
| Journal:                      | <i>BMJ Open</i>                                                                                                                                                                                                                                                                                                                                                                                                                                                                                                                                                                                                                                                                                                                                                                                                                                                                                                          |
| Manuscript ID                 | bmjopen-2020-038346                                                                                                                                                                                                                                                                                                                                                                                                                                                                                                                                                                                                                                                                                                                                                                                                                                                                                                      |
| Article Type:                 | Protocol                                                                                                                                                                                                                                                                                                                                                                                                                                                                                                                                                                                                                                                                                                                                                                                                                                                                                                                 |
| Date Submitted by the Author: | 07-Mar-2020                                                                                                                                                                                                                                                                                                                                                                                                                                                                                                                                                                                                                                                                                                                                                                                                                                                                                                              |
| Complete List of Authors:     | <p>Haque, Russel; Macquarie University Hospital, Department of Orthopaedic Surgery; Macquarie University Hospital, The Limb Reconstruction Discipline</p> <p>Al-Jawazneh, Shakib; Macquarie University Hospital, Department of Orthopaedic Surgery; The University of Sydney, Faculty of Medicine and Health</p> <p>Hoellwarth, Jason; Macquarie University Hospital, Department of Orthopaedic Surgery</p> <p>Akhtar, Muhammad Adeel; NHS Fife, Depart of Orthopaedic Surgery</p> <p>Doshi, Karan; Macquarie University Hospital, Department of Orthopaedic Surgery</p> <p>Tan, Yao Chang; Macquarie University</p> <p>Lu, William; Macquarie University,</p> <p>Roberts, Claudia; Macquarie University Hospital, The Limb Reconstruction Discipline</p> <p>Al Muderis, Munjed; Macquarie University Hospital, Department of Orthopaedic Surgery; Macquarie University Hospital, The Limb Reconstruction Discipline</p> |
| Keywords:                     | ORTHOPAEDIC & TRAUMA SURGERY, REHABILITATION MEDICINE, Limb reconstruction < ORTHOPAEDIC & TRAUMA SURGERY, PLASTIC & RECONSTRUCTIVE SURGERY                                                                                                                                                                                                                                                                                                                                                                                                                                                                                                                                                                                                                                                                                                                                                                              |
|                               |                                                                                                                                                                                                                                                                                                                                                                                                                                                                                                                                                                                                                                                                                                                                                                                                                                                                                                                          |

SCHOLARONE™  
Manuscripts

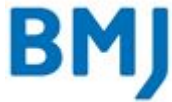

I, the Submitting Author has the right to grant and does grant on behalf of all authors of the Work (as defined in the below author licence), an exclusive licence and/or a non-exclusive licence for contributions from authors who are: i) UK Crown employees; ii) where BMJ has agreed a CC-BY licence shall apply, and/or iii) in accordance with the terms applicable for US Federal Government officers or employees acting as part of their official duties; on a worldwide, perpetual, irrevocable, royalty-free basis to BMJ Publishing Group Ltd ("BMJ") its licensees and where the relevant Journal is co-owned by BMJ to the co-owners of the Journal, to publish the Work in this journal and any other BMJ products and to exploit all rights, as set out in our [licence](#).

The Submitting Author accepts and understands that any supply made under these terms is made by BMJ to the Submitting Author unless you are acting as an employee on behalf of your employer or a postgraduate student of an affiliated institution which is paying any applicable article publishing charge ("APC") for Open Access articles. Where the Submitting Author wishes to make the Work available on an Open Access basis (and intends to pay the relevant APC), the terms of reuse of such Open Access shall be governed by a Creative Commons licence – details of these licences and which [Creative Commons](#) licence will apply to this Work are set out in our licence referred to above.

Other than as permitted in any relevant BMJ Author's Self Archiving Policies, I confirm this Work has not been accepted for publication elsewhere, is not being considered for publication elsewhere and does not duplicate material already published. I confirm all authors consent to publication of this Work and authorise the granting of this licence.

1  
2  
3  
4  
5  
6  
7  
8  
9  
10  
11  
12

## Osseointegrated Reconstruction and Rehabilitation of Transtibial Amputees: the Osseointegration Group of Australia surgical technique and protocol for a prospective cohort study

Russel Haque<sup>1,2,5</sup>, Shakib Al-Jawazneh<sup>1,3,5</sup>, Jason Shih Hoellwarth<sup>1</sup>, Muhammad Adeel Akhtar<sup>1,4</sup>, Karan Doshi<sup>1,2</sup>, Yao Chang Tan<sup>5</sup>, William Lu<sup>5</sup>, Claudia Roberts<sup>2</sup>, Munjed Al Muderis<sup>1,2,5</sup>

- 13 1. Department of Orthopaedic Surgery, Macquarie University Hospital, Sydney, New South Wales, 2109, Australia
- 14 2. The Limb Reconstruction Discipline, Macquarie University Hospital, Sydney, New South Wales, Australia
- 15 3. Faculty of Medicine and Health, University of Sydney, New South Wales, Australia
- 16 4. NHS Fife, Victoria Hospital, Kirkcaldy, Scotland, United Kingdom.
- 17 5. Osseointegration Group of Australia, 2 Technology Place, Macquarie University, NSW 2220 Australia

23  
24  
25  
26  
27

### \*Corresponding author:

28 William Lu

29  
30 Osseointegration Group of Australia, 2 Technology Place, Macquarie University, NSW 2220  
31 Australia

32  
33  
34 Phone: +61 0468805858

35  
36 Email: research@osseointegrationaustralia.com.au

37  
38  
39  
40  
41  
42  
43  
44  
45  
46  
47  
48  
49  
50  
51  
52  
53  
54  
55  
56  
57  
58  
59  
60

Keywords: Osseointegration; Lower limb amputees; Transtibial



## Abstract

### Introduction

Lower extremity amputation uniformly impairs a person's vocational, social, and recreational capacity compared to a healthy state, reducing their quality of life. Rehabilitation in Traditional Socket Prostheses (TSP) is associated with a spectrum of complications which includes minor skin abrasions, infected open wounds, poor proprioception with resultant frequent falls, excess sweating, and suboptimal fit. Osseointegration has recently emerged as a novel concept to overcome these complications by eliminating the socket-residuum interface and anchoring the prosthesis directly to bone. Though the complications of TSPs affect both transfemoral and transtibial amputees, Osseointegration has been predominantly performed in transfemoral ones assuming a greater benefit/risk ratio. However, as the safety of the procedure has been established, we intend to extend the concept to transtibial amputees and document the outcomes. The purpose of this paper is to describe the surgical technique of transtibial osseointegration, and formulate the protocol for a prospective study describing patient selection, surgical technique and rehabilitation, in order to report the clinical and functional outcomes and complications of transtibial osseointegration.

### Methods and analysis

The inclusion criteria are age over 18 years, unilateral, bilateral and mixed transtibial amputation and experiencing socket-related problems. All patients receive Osseointegrated implants, the type of which depend on the length of the residuum and quality of bone, which are press-fitted into the residual bone. Objective functional outcomes and subjective patient-reported-quality-of-life outcomes are recorded preoperatively and at defined post-operative follow-up intervals up to 2 years, and compared to the pre-operative values and values recorded in transfemoral osseointegration patients. Adverse events are also recorded.

### Ethics and dissemination

The Ethics approval for the study has been received from the University of Notre Dame, Sydney, Australia (014153S). The outcomes of this study will be disseminated by publications in peer-reviewed academic journals and scientific presentations at relevant orthopaedic and clinical conferences.

### Strengths and Limitations of the study

- This study will be the first major one to focus on transtibial osseointegration only and will have the largest cohort reported in literature so far.

- The findings of the study would not only underline the feasibility of osseointegration in terms of risks and benefits in transtibial amputees but also make an important contribution to the otherwise limited literature regarding outcomes of osseointegration in lower extremity amputations.
- The data may also help provide a foundation for estimating societal impact of transtibial osseointegration, particularly the true economic impact as compared to traditional socket prostheses by indirect means.
- It does not have a control group and therefore comparison of outcomes of transtibial osseointegration directly with traditional socket prostheses used by transtibial amputees is not possible.
- The study has a relatively short follow-up period of 2 years, which does not allow the examination of longer term outcomes and risk of adverse events.

## Introduction

Amputation of a lower extremity not only causes changes in the anatomy and function of the limb but also almost inevitably results in major impairments of the person's vocational, social and recreational abilities and overall quality of life.<sup>1</sup> The focus of management of extremity amputations has evolved over time due to advancement of medical technology from prevention of mortality to overcoming these impairments and improving quality of life.<sup>2</sup> For centuries, the conventional way of rehabilitating such individuals has been via traditional socket mounted prostheses (TSP),<sup>3</sup> and despite significant technological innovations to both socket materials and design, there has been very little change to the overall prosthetic-residuum interface from a moulded compression cone to modern suction-based socket suspension.<sup>4</sup>

The use of TSP is associated with a spectrum of complications arising mainly out of the socket-residuum-interface that causes reduction in prosthesis use, ability to mobilize and quality of life.<sup>1, 5-7</sup> These include skin problems such as infections, and skin breakdown due to chronic irritation and thermal injury,<sup>8-11</sup> mechanical problems such as suboptimal fit, pain and pistoning<sup>12</sup> and lastly, problems with proprioception that leads to loss of balance and falling.<sup>13</sup> Socket prostheses users account for their poor quality of life mostly to physical disability, pain and decreased energy levels.<sup>5, 14</sup>

In order to overcome these complications, a significantly different concept has emerged over the past two decades, which circumvents the socket-residuum-interface completely by anchoring the prosthesis directly to the bone, popularly known as Osseointegration.<sup>15</sup> It involves insertion of porous metal implant in the medullary cavity of the bone in a screw or press-fit technique, over which compact cortical bone grows without any intervening soft tissue in a short course of time, integrating the implant structurally and functionally to the bone.<sup>16</sup>

This integration of nonvital component into living bone was first discovered serendipitously in 1950s in rabbit models<sup>4</sup> and has been well established in the field of dentistry for the

1  
2  
3 treatment of edentulous jaws for many years with a 10-year survival of dental implants in  
4 mandibular bone of 95%.<sup>17-20</sup> Since its first introduction in 1990s in individuals with  
5 amputations, osseointegration has been predominantly used for the treatment of  
6 individuals with transfemoral amputation demonstrating multiple potential advantages such  
7 as improved walking ability, daily prosthetic use, reduced energy consumption, sitting  
8 comfort and osseoperception.<sup>7, 21, 22</sup> This results in improved mobility and quality of life for  
9 individuals with amputations.<sup>1, 7, 21, 23</sup>  
10  
11  
12  
13

14 Over the last few years multiple studies have been published investigating the safety of this  
15 procedure, especially in individuals with transfemoral amputations, as incorporating a metal  
16 implant into the bone, whilst having an open connection with the outside environment can  
17 give rise to substantial concerns regarding the risk of ascending infection and concomitant  
18 implant loosening or sepsis.<sup>24-30</sup> Multiple studies reported that despite frequent colonization  
19 around the skin-implant interface, the implant system caused few infections leading to  
20 disability or implant removal (average 4%).<sup>24-30</sup> Most encountered complications were soft  
21 tissue infections or redundancy of soft tissue possibly influenced by learning curve and  
22 iteration of surgical technique and implant design.<sup>24, 28</sup>  
23  
24  
25  
26

27 Osseointegration has been predominantly used in transfemoral amputees (TFA) as  
28 compared to transtibial amputees (TTA), due to apparently greater benefit-risk ratio with  
29 the TFA being perceived to have more socket related problems and poorer mobility as  
30 compared to TTAs and the extent of risks or complications of the new procedure largely  
31 unknown.<sup>14, 31-33</sup> Due to the same reasons, commercial availability of approved standard  
32 implants for TFA only promoted its use. Furthermore, it is much easier to press-fit or insert a  
33 screw fixation implant in to a cylindrical cortical bone such as a femur as opposed to the  
34 reverse pyramid shaped cancellous bone of the proximal tibia<sup>25</sup>. It is very challenging to  
35 press fit an implant into cancellous bone and achieve immediate stability. The same  
36 principles apply to a screw fixation device.  
37  
38  
39  
40  
41

42 With the establishment of safety of this procedure in literature, there is enough justification  
43 now for its use in individuals with TTA. Firstly, the prevalence of transtibial amputations is  
44 much higher than transfemoral amputations.<sup>34, 35</sup> Of these individuals using socket  
45 prostheses, 40% experience at least one skin problem, with the percentage substantially  
46 higher in individuals with TTA (TTA: 45.8%, TFA: 20%; OR: 4.1). Secondly, there is increased  
47 percentage of stump pain reported in patients with TTA.<sup>8, 36</sup> Thirdly, suboptimal socket fit  
48 occurs in both individuals with TTA and with TFA (TTA: 59%, TFA: 78%)<sup>37</sup> and dissatisfaction  
49 with socket prostheses does not differ when comparing for level of amputation, with only  
50 43% being satisfied with the comfort of their prosthesis.<sup>38-40</sup> These problems are inherently  
51 linked to intolerance of the prosthesis<sup>12</sup> and impact the ability of TTA to become  
52 independently mobile.<sup>41</sup>  
53  
54  
55  
56  
57  
58  
59  
60

1  
2  
3 Until recently, there is very little data assessing the protocol, techniques and results of  
4 Osseointegration in individuals with TTA. Only few papers with very small case series have  
5 been published with variable results.<sup>25, 27, 42, 43</sup>  
6  
7

8 The purpose of this paper is to describe the surgical technique of transtibial  
9 osseointegration, and formulate the protocol for a prospective study describing patient  
10 selection, surgical technique, rehabilitation, in order to report the clinical and functional  
11 outcomes and complications of the procedure in transtibial amputees.  
12  
13

### 14 **Study objectives**

15  
16  
17 The overall objective of this study is to assess the safety and efficacy of transtibial  
18 osseointegration procedure with at least 2 year follow-up and to compare the benefits and  
19 risks from pre-operative status and with the previously reported outcomes for transfemoral  
20 osseointegration. Specifically, this would involve:  
21

- 22 1. Assessing the objective functional outcomes with the 6 Minute Walk Test (6MWT),  
23 Timed Up and Go (TUG) and K-levels, compared with preoperative data and with outcomes  
24 of TFA.  
25
- 26 2. Assessing the subjective patient-reported quality-of-life outcomes with the Short  
27 Form Health Survey 36 (SF-36), compared with preoperative data and with outcomes of TFA.  
28
- 29 3. Examining the prevalence of adverse events, including infection, revision surgery,  
30 fractures and implant failures, and compare with the adverse events after TFA.  
31

### 32 **Methods and analysis**

33  
34  
35 The current prospective cohort study is designed to assess the safety and efficacy of  
36 Transtibial Osseointegration procedure with at least 2 years follow-up. Patients are  
37 evaluated by validated outcome measures preoperatively and postoperatively. Preliminary  
38 data has been obtained from an initial pilot study comprising 10 patients, which has been  
39 used to provide the sample size estimate for the current study. The outcomes of this study  
40 will be compared with those obtained using the previously for Transfemoral  
41 Osseointegration at the same follow-up time points.  
42  
43  
44

### 45 **Patient selection**

#### 46 **Eligibility criteria**

47  
48  
49 The inclusion criteria are age over 18 years, unilateral, bilateral, mixed transtibial  
50 amputation and experiencing socket-related problems or difficulties in using socket  
51 prostheses. Exclusion criteria included limb exposure to radiation, on-going chemotherapy,  
52 psychological instability, inability to comply with the rehabilitation program, residual tibia  
53 not suitable for osseointegration surgery and uncontrolled diabetes mellitus or peripheral  
54 vascular disease. All participants gave their informed consent. The Ethics approval for the  
55 study has been received from the University of Notre Dame, Sydney, Australia (014153S).  
56 Patients or the public WERE NOT involved in the design, or conduct, or reporting, or  
57 dissemination plans of our research.  
58  
59  
60

## Patient screening and recruitment

Patients were either referred by general practitioners, rehabilitation physicians, specialists, prosthetists. All prospective patients were advised to complete an online form and were contacted over phone to carefully document their demography, medical and prosthetic history, issues with compliance, psychological and pain history and to understand their expectations. If the patients satisfied the inclusion criteria prima facie, they were invited to the multi-disciplinary clinic for evaluation. The clinic would usually comprise of specialist orthopaedic surgeons, orthopaedic fellows in training, rehabilitation specialist, prosthetists, psychologist, medical physician and nurse practitioner. Evaluation consisted of a screening interview, clinical and radiological examination to assess eligibility and recording of baseline values of outcome measures. Patients who were found to be suitable were counselled regarding the procedure, rehabilitation protocol and possible complications and enrolled for transtibial osseointegration surgery. The first patient who underwent the procedure was enrolled in April 2014. Enrolment is ongoing at the time of publication of this paper and is expected to be completed by April 2022 and expected to be more than 100 patients.

## Study intervention

### Preoperative management

All the patients were assessed with AP and lateral plain radiographs of the residuum to assess the bone quality and presence of any anomaly. Long leg standing radiographs were performed to assess the mechanical alignment of the lower limbs and to rule out pathologies in the contralateral limb. DEXA scans of the proximal femora and the spine to assess the bone mineral density which would help determine the speed of post-operative rehabilitation. Furthermore, CT scans of the residual bone was performed to plan for the type of implant and size that would be required.

All patients were assessed pre-operatively by the team physiotherapist was prescribed a training program for optimization of core strength, upper body strength, transfers, use of gait aids and loading.

### Osseointegration Implant

Transtibial amputees are divided into two groups, the first being pre-existing amputation prior to osseointegration. For this group, the level of amputation is commonly at the metaphyseal level which is approximately one hand breadth below the tibial tubercle or around 10-14cm. For some patients, the amputation level is much higher. This group requires customization of implant considering the large variety of length, shape and diameter of the tibial residuum. The shorter the residuum the greater the complexity which is usually associated with a higher risk of failure.

1  
2  
3 The second group are the patients who require amputation where the surgeon has the  
4 luxury to control the level of amputation. Here, the ideal level of amputation is 25cm from  
5 the ground to allow enough clearance for prosthetic components. This will enable the  
6 implantation of a standard femoral implant of 160mm in length (Osseointegrated Prosthetic  
7 Limb (OPL, Permedica s.p.a., Milan, Italy) with excellent pressfit in the diaphysis of the tibial  
8 bone, similar to that of transfemoral implantation.  
9  
10

11  
12 In our pilot project, we decided to choose the path of 3D printing with coarse surface  
13 structure and trialed several implant designs from CustoMed (South Africa), AQ implants  
14 (Germany), BresMedical (Australia) and also using a modified ILP/ESKA with a spongy metal  
15 surface. We also utilized a lesser rough surface coating with plasma spray for that cohort,  
16 every single one of which failed. Later down the track had two implant breakages of the 3D  
17 printed implant which made us more cautious of such implant design and technique  
18 especially in overweight males who are highly active. This resulted in the transition to  
19 machined implants with additive rough coating surface that give similar roughness of what a  
20 3D implant can provide but much stronger core structure.  
21  
22

23  
24 To summarise, the Transtibial Osseointegration implant used by us for, was designed by  
25 senior author (MAM) into mainly two types. For longer residuums with sufficient cortical  
26 bone, a standard titanium implant which was machine manufactured of 160mm length with  
27 plasma spraying on the surface was used (Figure 1). Alternatively, for short residuums with  
28 metaphyseal bone a custom-made short stem titanium implant with coarser surface  
29 structure was either machine manufactured or 3D printed. The surface of the implant is  
30 composed of a macroporous mesh-like structure allowing for bone ingrowth. Some implants  
31 contain longitudinal flanges for additional rotational stability. All implants are connected to  
32 a dual cone adapter with Morse-taper ends connecting the implant with the external  
33 prosthesis. The surface of the dual cone adapter is highly polished and coated with titanium-  
34 niobium oxide, an alloy known to have bacterial repellent properties<sup>4</sup>, which also facilitates  
35 the excursion of the soft tissues and skin over it avoiding adhesions. A safety mechanism is  
36 built into the dual cone, with a safety pin that breaks to reduce the chance of periprosthetic  
37 fractures or implant breakage.  
38  
39  
40

#### 41 42 **Surgical Technique** 43

44 All patients received an osseointegrated implant in a single-stage surgery. Spinal and  
45 general anesthesia was used and 2grams of cephazolin was administered for infection  
46 prophylaxis. Patients were placed in supine position, side supports were applied, a padding  
47 bolster was placed under the hip and an uninflated tourniquet was applied to the affected  
48 leg. For disinfection alcoholic chlorhexidine was used, after which a disposable fenestrated  
49 extremity drape was applied.  
50  
51  
52

53  
54 At the level of the distal stump, a horizontal elliptical incision was made, the amount of soft  
55 tissue and muscle tissue was minimalized and all nerves were sharply severed and vessels  
56 were ligated or cauterized until hemostasis was achieved. The saphenous, tibial and  
57 common peroneal nerves were re-innervated to surrounding muscle branches if symptoms  
58 of nerve pain or excessive phantom pain existed pre-operatively (Figure 2). Alternatively,  
59  
60



1  
2  
3 the re-innervation of tibial and common peroneal nerves can be performed via a separate  
4 lateral distal thigh incision and posterior dissection.  
5

6  
7 Care was taken to preserve the periosteum at all times. If the distal end of the tibia needed  
8 to be re-cut, the periosteum was elevated and re-sutured to the end of the bone after using  
9 an oscillating saw for the distal tibia osteotomy. The fibula was usually cut 2-3 cm shorter  
10 than the tibia using the saw.  
11

12  
13 The intramedullary canal was prepared depending on the length of the residuum. If the  
14 amputation was at the diaphysal level with good cortical bone distally then reaming up to  
15 0.5 mm larger than the definite implant anticipated to be used after cortical chatter is heard  
16 (Figure 3) followed by sequential broaching up to the size of the desired implant (Figure 4).  
17 If the tibial stump was at the metaphyseal level with poor quality bone then no reaming was  
18 done and only impaction broaching was performed usually stopping at 2 mm smaller than  
19 the definite size of the implant. Both reaming and broaching is performed under image  
20 intensifier guidance to ensure accurate positioning in the centre of the tibia on the AP and  
21 lateral planes. Finally, the distal edge of the tibia was smoothed with use of a face-reamer  
22 (Figure 5).  
23

24  
25 Final implantation of the osseointegration intramedullary component was done using press-  
26 fit technique up to the subchondral bone of the proximal tibia (Figure 6). To stabilize the  
27 implant in shorter residual stumps, multiple locking screws were initially used, before it was  
28 abandoned due to increased risk of loosening and no added benefits.  
29

30  
31 Closure was initiated by suturing the fascia to the periosteum all around at the distal end of  
32 the tibial stump in a 'purse-string' fashion. The anterior and posterior soft tissue sleeves  
33 were refashioned to remove subcutaneous fat. A flap would be created-preferably anterior,  
34 to cover the end of the stump and to begin closure in layers. A sharp corer was used to  
35 make a stoma in the flap to communicate to the exact diameter of the implant, before  
36 progressing to close the rest of the wound in layers. Alternatively, the anterior and posterior  
37 flaps were closed around the implant in a 'fish-mouth' fashion (Figure 7). After this step, the  
38 dual cone component of the osseointegration device was inserted and secured with an  
39 internal locking screw, followed by fixing the taper sleeve and bushing to the dual cone  
40 using an external screw, all the time securing the implant to prevent rotation using a special  
41 device (Figure 8 and 9).  
42

### 43 **Postoperative Rehabilitation**

44  
45 Postoperative rehabilitation for transtibial osseointegration is carried out in two phases.  
46 Phase one is just after surgery and comprises of applying static axial load for twenty minutes  
47 twice per day. Loading commences on Day One, starting with 5kg and with progressive  
48 increments of 5kg per day for those with longer residuums and a standard 160mm implant  
49 and 5kg per week for those patients with shorter residuums that require customized  
50

1  
2  
3 implants. The loading phase continues until either 50% of patient's body weight or 50 kg is  
4 reached. Phase two comprises of fitting the external prosthetic limb and performance core  
5 muscle strengthening, gait and balance exercises. By this point daily weight-bearing is  
6 initiated two weeks post-surgery for long residuums with sufficient cortical bone and by six  
7 weeks for short residuums.  
8  
9

## 10 11 **Further Rehabilitation**

12  
13 Following the fitting of a prosthetic limb (Figure 10), patients are encouraged to weight-bear  
14 daily on their prosthesis using two crutches for six weeks and then one crutch on the  
15 opposite side for a further six weeks and then unaided thereafter. All this time home based  
16 physiotherapy to improve gait, balance, and negotiation of obstacles, slopes and staircase is  
17 continued.  
18  
19

## 20 21 **Outcome**

### 22 23 **Demographics and functional outcomes**

24  
25 At baseline, data was obtained including patient characteristics; such as demographics,  
26 cause of amputation, age at amputation and previous medical history. Functional outcome  
27 measures and conventional radiographs were also taken at baseline as well as at 12, 24 and  
28 yearly follow-up thereafter. Functional outcomes comprised of 1) objective functional  
29 outcomes measuring 6 Minute Walk Test (6MWT)<sup>44</sup>, Timed up and Go (TUG)<sup>45</sup> and K  
30 levels<sup>46</sup>, 2) subjective patient-reported-outcome-measure Short-form 36 (SF-36)<sup>47</sup> and 3)  
31 prevalence of adverse events.  
32  
33  
34  
35

### 36 37 **Adverse events**

38  
39 Adverse events were reported which included infection that required hospitalization for  
40 administration of intravenous antibiotics or surgical intervention, periprosthetic fracture,  
41 implant breakage, aseptic loosening, need for revision surgery or additional amputation and  
42 death. Severity of infections was assessed and graded into AI Muderis et al. classification  
43 system.<sup>24</sup> During the study, all patients would be contacted to ensure that all adverse events  
44 are recorded. Patients would also be asked whether, after their current experience with  
45 osseointegration, they would choose osseointegration again.  
46  
47

### 48 49 **Data analysis**

50  
51 A p value of < 0.05 was considered to be significant in this study. Demographic and  
52 functional data were compared using IBM SPSS software, version 22 0 (IBM Corp.,  
53 Armonk, New York, USA). Continuous variables would be summarized with mean and SE and  
54 the distribution of the data would be checked for normality using Kolmogorov-Smirnov Test.  
55 Variations in parameters due to demography would be tested for statistical significance  
56 using the Chi-square test. Depending on normality, parametric (like ANOVA) or non-  
57 parametric tests (like Wilcoxon test) would be used for comparison of functional scores pre  
58 and post-operatively. Fisher's exact test would be used to test significance of K-levels pre  
59  
60



1  
2  
3 and post-operatively. Correlation analysis would also done using the Spearman's test when  
4 ordinal and scale data were involved and Pearson's test when only scale data was involved.  
5 Cumulative implant survival would be assessed using a Kaplan-Meier Estimator.  
6  
7  
8

## 9 **Discussion**

10  
11  
12  
13 This study will be the first major one to focus on transtibial osseointegration only and will  
14 have the largest cohort reported in literature so far. The findings of the study would not  
15 only underline the feasibility of osseointegration in terms of risks and benefits in transtibial  
16 amputees but also make an important contribution to the otherwise limited literature  
17 regarding outcomes of osseointegration in lower extremity amputations. As evidenced by  
18 literature, transtibial amputees using TSP suffer from same difficulties involving skin  
19 breakdown<sup>8</sup>, suboptimal fit<sup>48</sup> and pain<sup>4</sup> as do the transfemoral ones, which ultimately affect  
20 their prosthetic use, mobility and overall quality of life. As the dramatically different concept  
21 of osseointegration proved life-changing in management of transfemoral amputees with  
22 established safety, it is only logical to extend the science to transtibial amputees and  
23 document the outcomes.  
24  
25  
26  
27  
28

29 The clinical application of osseointegration was first seen in the field of dentistry<sup>18</sup>, and as its  
30 efficacy was established, the concept was extended to transfemoral amputees more than  
31 two decades back.<sup>20</sup> The challenges posed by TSP were overcome by direct anchorage of the  
32 implant to the bone that enabled physiological weight bearing<sup>16</sup>, increased flexibility and  
33 range of motion<sup>49</sup>, sitting comfort<sup>50</sup>, mechanoreception-based sensory feedback  
34 (osseoperception)<sup>22</sup>, improved donning and doffing<sup>23</sup>, better mobility<sup>7</sup> and improved  
35 prosthetic use<sup>23</sup>, body image<sup>48</sup> and quality of life<sup>23</sup>. The safety of the implant was  
36 established in subsequent studies in terms of stability and risk of infection.<sup>24</sup>  
37  
38  
39  
40

41 Although largely unreported in literature so far, the further application of osseointegration  
42 to transtibial amputees has been done in pilot project by our group to suitable patients as  
43 well as some other surgeons worldwide. Prospective outcomes at 12 months of five patients  
44 with peripheral vascular disease who underwent transtibial osseointegration was published  
45 recently by Al Muderis et al.<sup>42</sup> Results showed that all the patients enrolled in the study  
46 were able to mobilize unaided at final follow-up. There was notable improvement of  
47 objective functional measures of 6MWT and TUG as well as subjective functional measures,  
48 while only two superficial infections were noted which resolved with conservative  
49 treatment and no implant loosening or other adverse event documented. However, two  
50 previous studies from Germany<sup>25, 27</sup> reporting on nine individuals with transtibial  
51 amputations treated with their custom cobalt chrome implants reported an explantation  
52 rate of 43% and rates of both septic and aseptic loosening of 22% each, though patient  
53 eligibility, rehabilitation and follow-up is unclear.  
54  
55  
56  
57  
58  
59  
60

1  
2  
3 Recently, another study comprising of a small number of nine transtibial patients having a  
4 follow-up of only 12 months has been reported from The Netherlands.<sup>43</sup> The cohort was a  
5 mixed one with majority (31 patients) being transfemoral patients. Comparison of outcomes  
6 between transtibial and transfemoral osseointegrated patients revealed higher overall  
7 baseline values in transtibial patients except walking distance in daily life and prosthetic  
8 comfort. Improvement in the outcome measures was also greater in transtibial patients  
9 (except hip abductor strength and prosthesis wearing time), and at final follow-up lesser  
10 transtibial patients experienced stump pain as compared to transfemoral patients  
11 (transfemoral: 20/31 (65%), transtibial: 2/9 (22%)). Major adverse events related to  
12 implants was recorded as 8% which included both groups and included three dual-cone  
13 breakages and four bone fractures (due to fall), which were all managed successfully.  
14 However, a lower uneventful course was noted in transtibial patients (44%) compared to  
15 transfemoral ones (61%). The authors concluded that transtibial osseointegration was both  
16 efficacious and safe at 12 months follow-up. On a different note, the author's claim to be  
17 the first study reporting outcomes of transtibial osseointegration patients is obviously  
18 erroneous as there has been other studies including one from our group previously.<sup>25, 27, 42</sup>  
19  
20  
21  
22  
23  
24  
25  
26  
27

## 28 **Conclusion**

29  
30 The proposed study would comprise the largest cohort of Transtibial amputees undergoing  
31 Osseointegration with a substantial follow-up time. The clinical outcomes and adverse  
32 events noted in this study would help considerably to set the standard of care in transtibial  
33 amputee patients and provide directions of further research in terms of implant design,  
34 surgical technique, rehabilitation or management of complications.  
35  
36  
37  
38  
39

## 40 **AUTHORS' CONTRIBUTIONS**

41 R Haque: Study design; patient care and surgical team; manuscript preparation.

42 S Al-Jawazneh: Data collection; patient care and surgical team

43 J Hoellwarth: Data collection; patient care and surgical team

44 M A Akhtar: Data collection; patient care and surgical team

45 K Doshi: Data collection; patient care and surgical team

46 Y Tan: Data collection, statistical evaluation

47 W. Lu: Data collection; manuscript preparation.

48 Claudia Roberts: Patient care; data collection; manuscript preparation.

49 M Al Muderis: Study design; patient care and surgical procedure; manuscript preparation.  
50  
51  
52  
53  
54  
55  
56  
57  
58

## 59 **FUNDING STATEMENT**

60

1  
2  
3 This research received no specific grant from any funding agency in the public, commercial or  
4 not-for-profit sectors.  
5  
6  
7

## 8 **COMPETING INTERESTS STATEMENT**

9  
10 M. Al Muderis receives royalties for design contributions for the Osseointegrated Prosthetic  
11 Limb (OPL; Permedica s.p.a; Milan, Italy) implant system. All other authors listed in this  
12 study declare no competing interests.  
13  
14  
15  
16

## 17 **References**

- 18 1. Hagberg K, Branemark R. Consequences of non-vascular trans-femoral amputation: a survey  
19 of quality of life, prosthetic use and problems. *Prosthetics and orthotics international*.  
20 2001;25(3):186-94.
- 21 2. Hoyt BW, Walsh SA, Forsberg JA. Osseointegrated prostheses for the rehabilitation of  
22 amputees (OPRA): results and clinical perspective. *Expert review of medical devices*. 2020;17(1):17-  
23 25.
- 24 3. Thurston AJ. Pare and prosthetics: the early history of artificial limbs. *ANZ J Surg*.  
25 2007;77(12):1114-9.
- 26 4. Zaid MB, O'Donnell RJ, Potter BK, Forsberg JA. Orthopaedic Osseointegration: State of the  
27 Art. *The Journal of the American Academy of Orthopaedic Surgeons*. 2019;27(22):e977-e85.
- 28 5. Demet K, Martinet N, Guillemin F, Paysant J, Andre JM. Health related quality of life and  
29 related factors in 539 persons with amputation of upper and lower limb. *Disability and*  
30 *rehabilitation*. 2003;25(9):480-6.
- 31 6. Marx RG, Wilson SM, Swiontkowski MF. Updating the assignment of levels of evidence. *The*  
32 *Journal of bone and joint surgery American volume*. 2015;97(1):1-2.
- 33 7. Van de Meent H, Hopman MT, Frolke JP. Walking ability and quality of life in subjects with  
34 transfemoral amputation: a comparison of osseointegration with socket prostheses. *Archives of*  
35 *physical medicine and rehabilitation*. 2013;94(11):2174-8.
- 36 8. Dudek NL, Marks MB, Marshall SC, Chardon JP. Dermatologic conditions associated with use  
37 of a lower-extremity prosthesis. *Archives of physical medicine and rehabilitation*. 2005;86(4):659-63.
- 38 9. Ghoseiri K, Safari MR. Prevalence of heat and perspiration discomfort inside prostheses:  
39 literature review. *Journal of rehabilitation research and development*. 2014;51(6):855-68.
- 40 10. Lyon CC, Kulkarni J, Zimerson E, Van Ross E, Beck MH. Skin disorders in amputees. *Journal of*  
41 *the American Academy of Dermatology*. 2000;42(3):501-7.
- 42 11. Meulenbelt HE, Geertzen JH, Jonkman MF, Dijkstra PU. Determinants of skin problems of the  
43 stump in lower-limb amputees. *Archives of physical medicine and rehabilitation*. 2009;90(1):74-81.
- 44 12. Al Muderis MM, Lu WY, Li JJ, Kaufman K, Orendurff M, Highsmith MJ, et al. Clinically  
45 Relevant Outcome Measures Following Limb Osseointegration; Systematic Review of the Literature.  
46 *Journal of orthopaedic trauma*. 2018;32(2):e64-e75.
- 47 13. Hunter SW, Batchelor F, Hill KD, Hill AM, Mackintosh S, Payne M. Risk Factors for Falls in  
48 People With a Lower Limb Amputation: A Systematic Review. *Pm&R*. 2017;9(2):170-80.
- 49 14. Amtmann D, Morgan SJ, Kim J, Hafner BJ. Health-related profiles of people with lower limb  
50 loss. *Archives of physical medicine and rehabilitation*. 2015;96(8):1474-83.
- 51 15. Li Y, Branemark R. Osseointegrated prostheses for rehabilitation following amputation : The  
52 pioneering Swedish model. *Der Unfallchirurg*. 2017;120(4):285-92.
- 53  
54  
55  
56  
57  
58  
59  
60

16. Overmann AL, Aparicio C, Richards JT, Mutreja I, Fischer NG, Wade SM, et al. Orthopaedic Osseointegration: Implantology and Future Directions. *Journal of orthopaedic research : official publication of the Orthopaedic Research Society*. 2019.
17. Adell R, Eriksson B, Lekholm U, Branemark PI, Jemt T. Long-term follow-up study of osseointegrated implants in the treatment of totally edentulous jaws. *Int J Oral Maxillofac Implants*. 1990;5(4):347-59.
18. Branemark PI, Adell R, Albrektsson T, Lekholm U, Lundkvist S, Rockler B. Osseointegrated titanium fixtures in the treatment of edentulousness. *Biomaterials*. 1983;4(1):25-8.
19. Branemark PI, Hansson BO, Adell R, Breine U, Lindstrom J, Hallen O, et al. Osseointegrated implants in the treatment of the edentulous jaw. Experience from a 10-year period. *Scand J Plast Reconstr Surg Suppl*. 1977;16:1-132.
20. Branemark R, Branemark PI, Rydevik B, Myers RR. Osseointegration in skeletal reconstruction and rehabilitation: a review. *Journal of rehabilitation research and development*. 2001;38(2):175-81.
21. Hagberg K, Hansson E, Branemark R. Outcome of percutaneous osseointegrated prostheses for patients with unilateral transfemoral amputation at two-year follow-up. *Archives of physical medicine and rehabilitation*. 2014;95(11):2120-7.
22. Hagberg K, Häggström E, Jönsson S, Rydevik B, Brånemark R. Osseoperception and Osseointegrated Prosthetic Limbs. 2008:131-40.
23. Hagberg K, Branemark R, Gunterberg B, Rydevik B. Osseointegrated trans-femoral amputation prostheses: prospective results of general and condition-specific quality of life in 18 patients at 2-year follow-up. *Prosthetics and orthotics international*. 2008;32(1):29-41.
24. Al Muderis M, Khemka A, Lord SJ, Van de Meent H, Frolke JP. Safety of Osseointegrated Implants for Transfemoral Amputees: A Two-Center Prospective Cohort Study. *The Journal of bone and joint surgery American volume*. 2016;98(11):900-9.
25. Aschoff HH, Juhnke DL. [Endo-exo prostheses : Osseointegrated percutaneously channeled implants for rehabilitation after limb amputation]. *Der Unfallchirurg*. 2016;119(5):421-7.
26. Branemark R, Berlin O, Hagberg K, Bergh P, Gunterberg B, Rydevik B. A novel osseointegrated percutaneous prosthetic system for the treatment of patients with transfemoral amputation: A prospective study of 51 patients. *The bone & joint journal*. 2014;96-B(1):106-13.
27. Juhnke DL, Aschoff HH. [Endo-exo prostheses following limb-amputation]. *Der Orthopade*. 2015;44(6):419-25.
28. Juhnke DL, Beck JP, Jeyapalina S, Aschoff HH. Fifteen years of experience with Integral-Leg-Prosthesis: Cohort study of artificial limb attachment system. *Journal of rehabilitation research and development*. 2015;52(4):407-20.
29. Muderis MA, Tetsworth K, Khemka A, Wilmot S, Bosley B, Lord SJ, et al. The Osseointegration Group of Australia Accelerated Protocol (OGAAP-1) for two-stage osseointegrated reconstruction of amputated limbs. *The bone & joint journal*. 2016;98-B(7):952-60.
30. Tillander J, Hagberg K, Berlin O, Hagberg L, Branemark R. Osteomyelitis Risk in Patients With Transfemoral Amputations Treated With Osseointegration Prostheses. *Clinical orthopaedics and related research*. 2017;475(12):3100-8.
31. Dougherty PJ. Transtibial amputees from the Vietnam War. Twenty-eight-year follow-up. *J Bone Joint Surg Am*. 2001;83(3):383-9.
32. Harness N, Pinzur MS. Health related quality of life in patients with dysvascular transtibial amputation. *Clinical orthopaedics and related research*. 2001(383):204-7.
33. Knezevic A, Salamon T, Milankov M, Ninkovic S, Jeremic Knezevic M, Tomasevic Todorovic S. Assessment of Quality of Life in Patients after Lower Limb Amputation. *Med Pregl*. 2015;68(3-4):103-8.
34. Dillingham TR, Pezzin LE, MacKenzie EJ. Limb amputation and limb deficiency: epidemiology and recent trends in the United States. *Southern medical journal*. 2002;95(8):875-83.

- 1
- 2
- 3
- 4 35. Ziegler-Graham K, MacKenzie EJ, Ephraim PL, Trivison TG, Brookmeyer R. Estimating the
- 5 prevalence of limb loss in the United States: 2005 to 2050. *Archives of physical medicine and*
- 6 *rehabilitation*. 2008;89(3):422-9.
- 7 36. Walker CR, Ingram RR, Hullin MG, McCreath SW. Lower limb amputation following injury: a
- 8 survey of long-term functional outcome. *Injury*. 1994;25(6):387-92.
- 9 37. Hoaglund FT, Jergesen HE, Wilson L, Lamoreux LW, Roberts R. Evaluation of problems and
- 10 needs of veteran lower-limb amputees in the San Francisco Bay Area during the period 1977-1980. *J*
- 11 *Rehabil R D*. 1983;20(1):57-71.
- 12 38. Behr J, Friedly J, Molton I, Morgenroth D, Jensen MP, Smith DG. Pain and pain-related
- 13 interference in adults with lower-limb amputation: comparison of knee-disarticulation, transtibial,
- 14 and transfemoral surgical sites. *Journal of rehabilitation research and development*. 2009;46(7):963-
- 15 72.
- 16 39. Dillingham TR, Pezzin LE, MacKenzie EJ, Burgess AR. Use and satisfaction with prosthetic
- 17 devices among persons with trauma-related amputations: a long-term outcome study. *Am J Phys*
- 18 *Med Rehabil*. 2001;80(8):563-71.
- 19 40. Pezzin LE, Dillingham TR, Mackenzie EJ, Ephraim P, Rossbach P. Use and satisfaction with
- 20 prosthetic limb devices and related services. *Archives of physical medicine and rehabilitation*.
- 21 2004;85(5):723-9.
- 22 41. Butler K, Bowen C, Hughes AM, Torah R, Ayala I, Tudor J, et al. A systematic review of the
- 23 key factors affecting tissue viability and rehabilitation outcomes of the residual limb in lower
- 24 extremity traumatic amputees. *Journal of tissue viability*. 2014;23(3):81-93.
- 25 42. Atallah R, Li JJ, Lu W, Leijendekkers R, Frolke JP, Al Muderis M. Osseointegrated Transtibial
- 26 Implants in Patients with Peripheral Vascular Disease: A Multicenter Case Series of 5 Patients with 1-
- 27 Year Follow-up. *The Journal of bone and joint surgery American volume*. 2017;99(18):1516-23.
- 28 43. Leijendekkers RA, van Hinte G, Frolke JP, van de Meent H, Atsma F, Nijhuis-van der Sanden
- 29 MW, et al. Functional performance and safety of bone-anchored prostheses in persons with a
- 30 transfemoral or transtibial amputation: a prospective one-year follow-up cohort study. *Clinical*
- 31 *rehabilitation*. 2019;33(3):450-64.
- 32 44. Lin SJ, Bose NH. Six-minute walk test in persons with transtibial amputation. *Archives of*
- 33 *physical medicine and rehabilitation*. 2008;89(12):2354-9.
- 34 45. Schoppen T, Boonstra A, Groothoff JW, de Vries J, Goeken LN, Eisma WH. The Timed "up and
- 35 go" test: reliability and validity in persons with unilateral lower limb amputation. *Archives of physical*
- 36 *medicine and rehabilitation*. 1999;80(7):825-8.
- 37 46. Al Muderis M, Lu W, Tetsworth K, Bosley B, Li JJ. Single-stage osseointegrated reconstruction
- 38 and rehabilitation of lower limb amputees: the Osseointegration Group of Australia Accelerated
- 39 Protocol-2 (OGAAP-2) for a prospective cohort study. *BMJ open*. 2017;7(3):e013508.
- 40 47. Ware JE, Jr., Sherbourne CD. The MOS 36-item short-form health survey (SF-36). I.
- 41 Conceptual framework and item selection. *Medical care*. 1992;30(6):473-83.
- 42 48. Muderis MA, Lu W, Glatt V, Tetsworth K. Two-Stage Osseointegrated Reconstruction of Post-
- 43 traumatic Unilateral Transfemoral Amputees. *Military medicine*. 2018;183(suppl\_1):496-502.
- 44 49. Tranberg R, Zugner R, Karrholm J. Improvements in hip- and pelvic motion for patients with
- 45 osseointegrated trans-femoral prostheses. *Gait & posture*. 2011;33(2):165-8.
- 46 50. Hagberg K, Haggstrom E, Uden M, Branemark R. Socket versus bone-anchored trans-femoral
- 47 prostheses: hip range of motion and sitting comfort. *Prosthetics and orthotics international*.
- 48 2005;29(2):153-63.
- 49
- 50
- 51
- 52
- 53
- 54
- 55
- 56
- 57
- 58
- 59
- 60

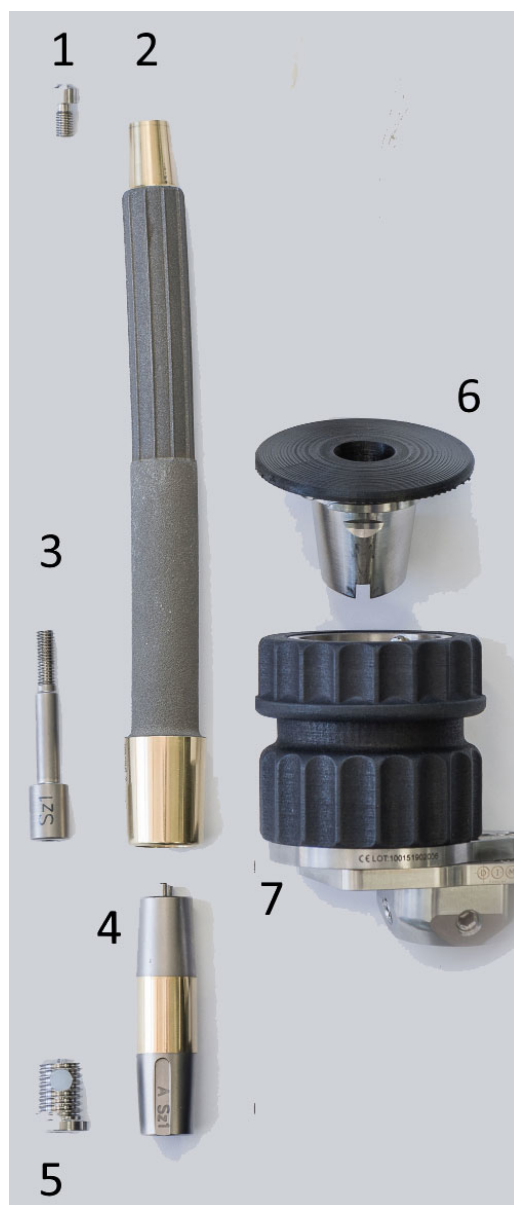

Figure 1: The Standard Implant for longer residuums. The parts include: 1, proximal cap screw. 2, Intramedullary body. 3, internal safety screw. 4, dual cone transcutaneous abutment adapter. 5, permanent locking propeller screw. 6, proximal connector. 7, prosthetic connector.

176x412mm (72 x 72 DPI)



1  
2  
3  
4  
5  
6  
7  
8  
9  
10  
11  
12  
13  
14  
15  
16  
17  
18  
19  
20  
21  
22  
23  
24  
25  
26  
27  
28  
29  
30  
31  
32  
33  
34  
35  
36  
37  
38  
39  
40  
41  
42  
43  
44  
45  
46  
47  
48  
49  
50  
51  
52  
53  
54  
55  
56  
57  
58  
59  
60

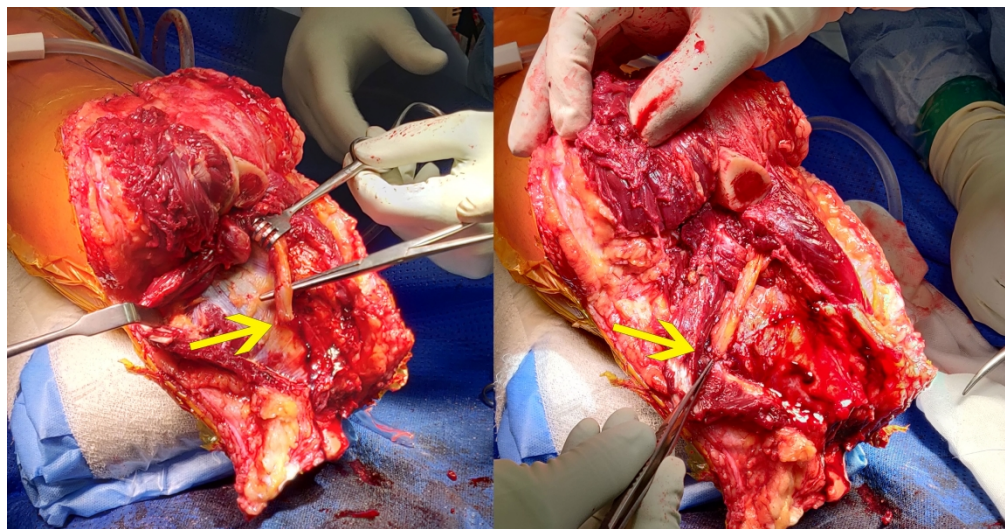

Figure 2: Targeted re-innervation of nerves (posterior tibial nerve highlighted) to surrounding muscular branches

1365x714mm (72 x 72 DPI)

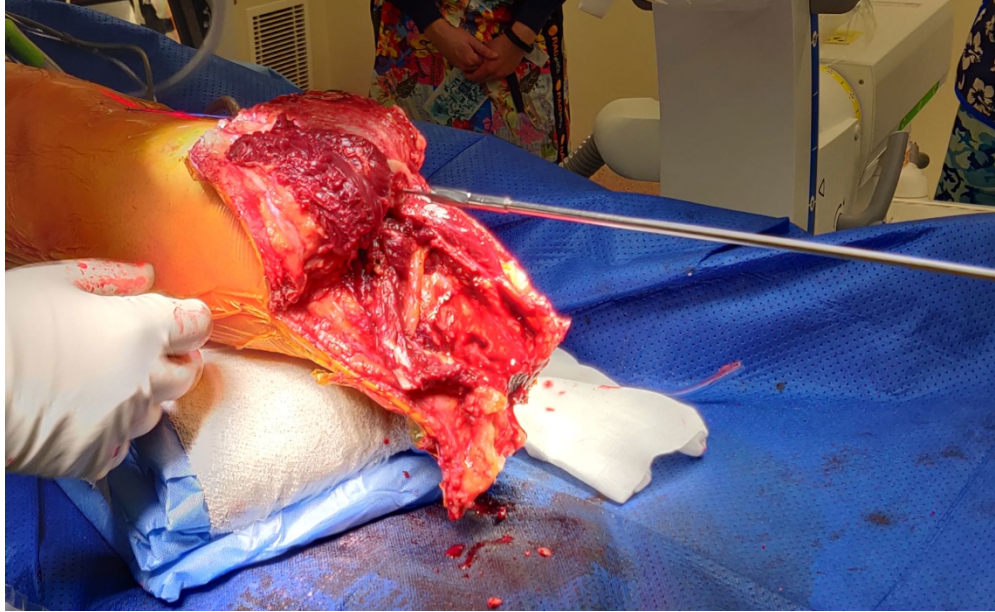

Figure 3: Reaming was done for longer residuums to 0.5 mm more than the diameter of implant expected to be used

817x499mm (72 x 72 DPI)



1  
2  
3  
4  
5  
6  
7  
8  
9  
10  
11  
12  
13  
14  
15  
16  
17  
18  
19  
20  
21  
22  
23  
24  
25  
26  
27  
28  
29  
30  
31  
32  
33  
34  
35  
36  
37  
38  
39  
40  
41  
42  
43  
44  
45  
46  
47  
48  
49  
50  
51  
52  
53  
54  
55  
56  
57  
58  
59  
60

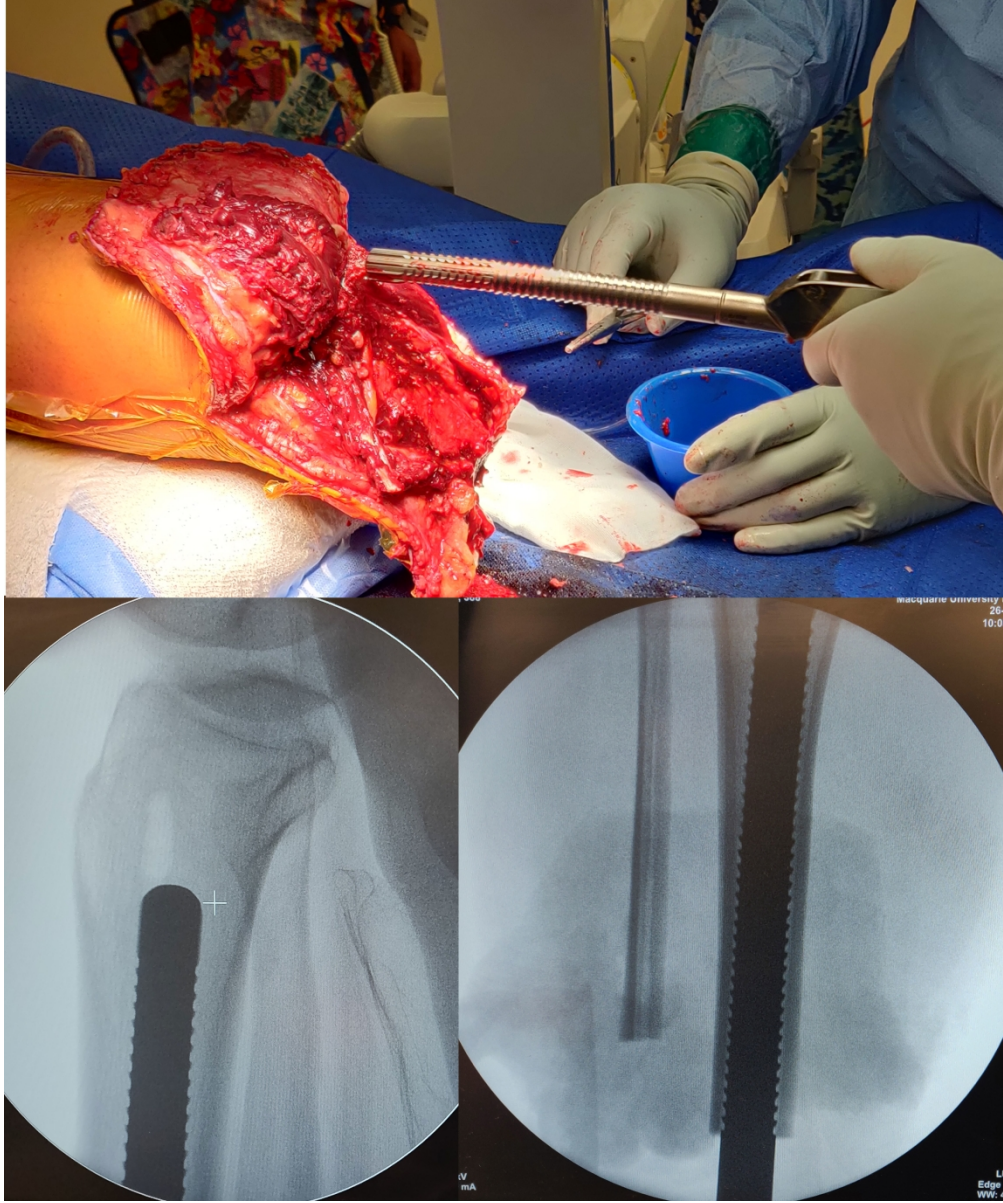

Figure 4: Broaching done under Image Intensifier guidance upto the desired size of implant for longer residuums

1365x1636mm (72 x 72 DPI)

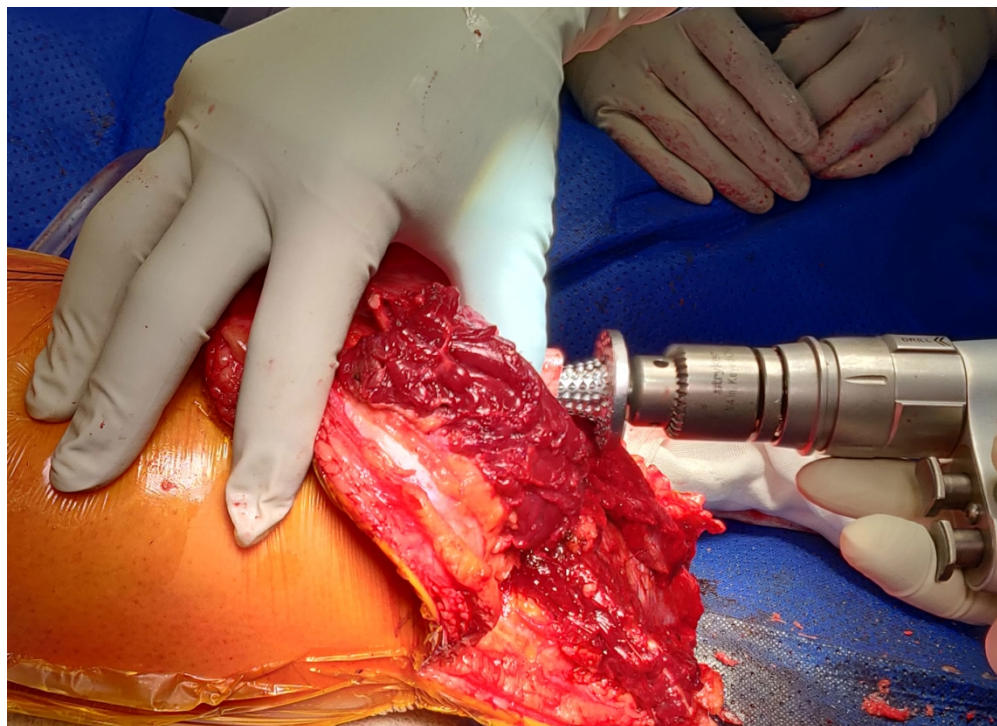

Figure 5: Face reaming done to smoothen the distal margins of the tibial stump

723x522mm (72 x 72 DPI)

1  
2  
3  
4  
5  
6  
7  
8  
9  
10  
11  
12  
13  
14  
15  
16  
17  
18  
19  
20  
21  
22  
23  
24  
25  
26  
27  
28  
29  
30  
31  
32  
33  
34  
35  
36  
37  
38  
39  
40  
41  
42  
43  
44  
45  
46  
47  
48  
49  
50  
51  
52  
53  
54  
55  
56  
57  
58  
59  
60

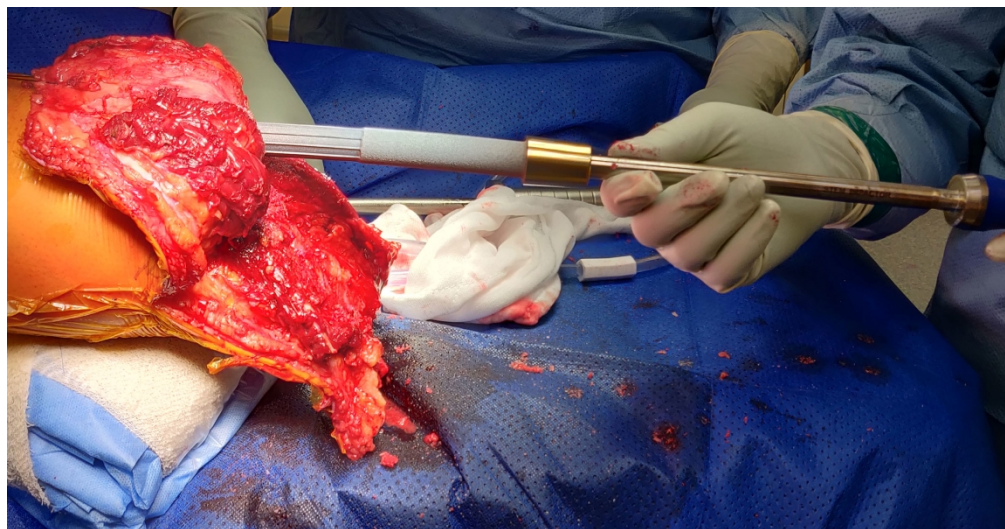

Figure 6: Final implantation of the definite intra-medullary component  
1051x552mm (72 x 72 DPI)



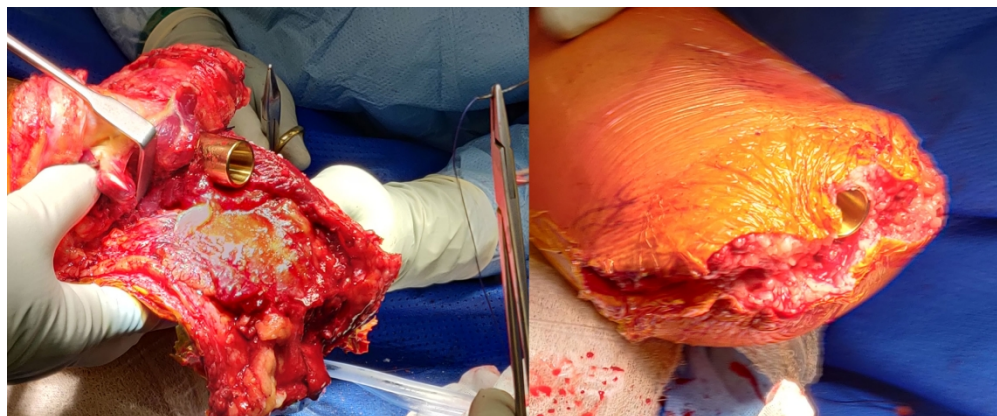

Figure 7: Closure of periosteum around the stump in a 'purse-string' fashion and the flaps around implant in 'fish-mouth' manner

867x357mm (72 x 72 DPI)

1  
2  
3  
4  
5  
6  
7  
8  
9  
10  
11  
12  
13  
14  
15  
16  
17  
18  
19  
20  
21  
22  
23  
24  
25  
26  
27  
28  
29  
30  
31  
32  
33  
34  
35  
36  
37  
38  
39  
40  
41  
42  
43  
44  
45  
46  
47  
48  
49  
50  
51  
52  
53  
54  
55  
56  
57  
58  
59  
60

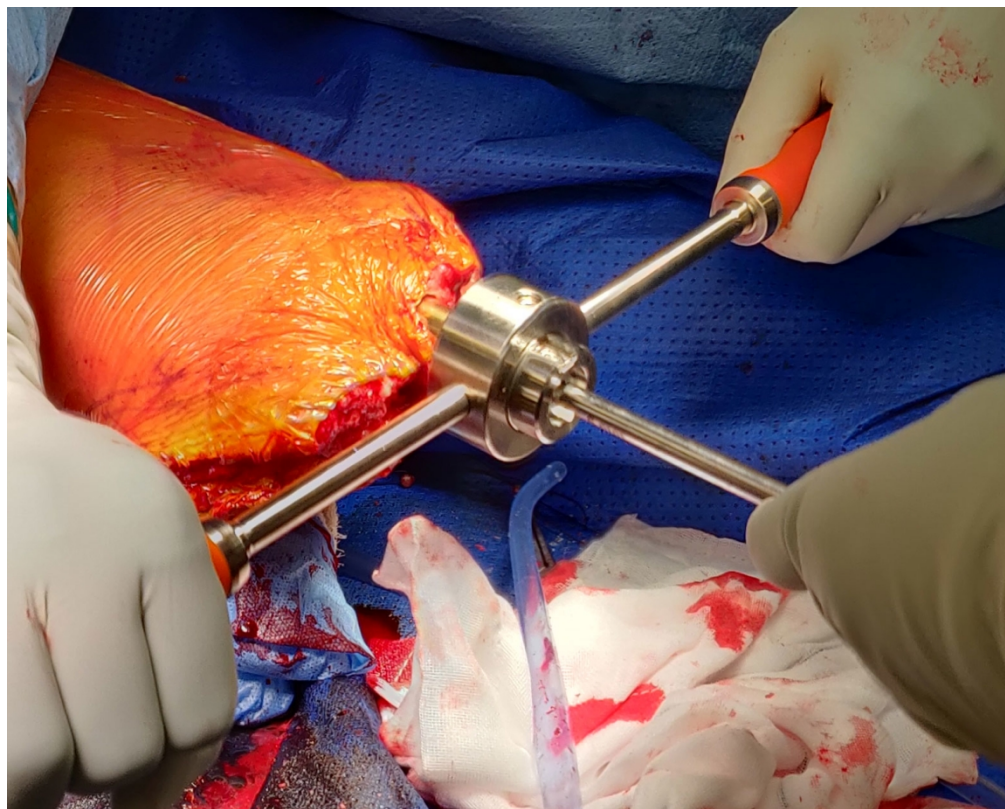

Figure 8: Attachment of extra-medullary components  
552x444mm (72 x 72 DPI)

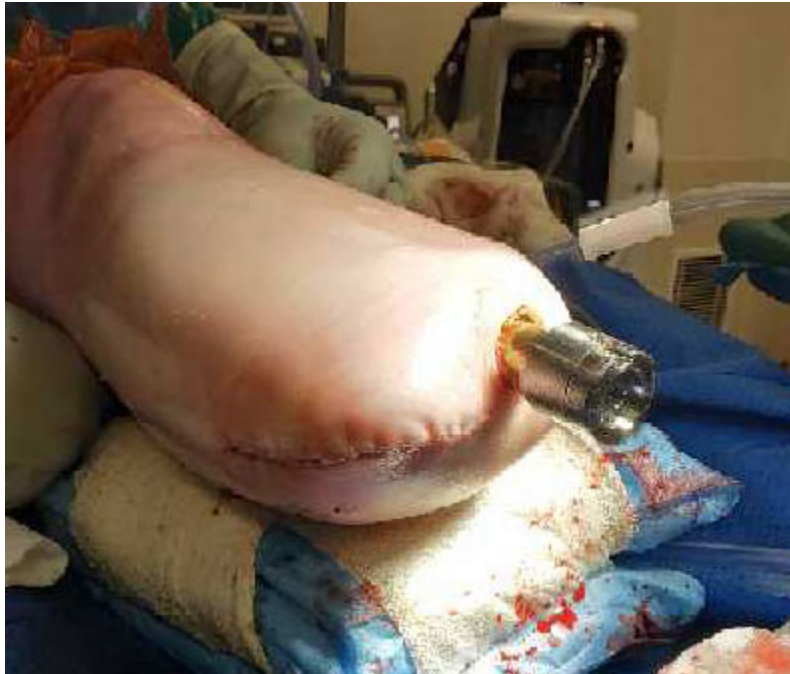

Figure 9: Final view of the closure of the stump

140x118mm (72 x 72 DPI)

1  
2  
3  
4  
5  
6  
7  
8  
9  
10  
11  
12  
13  
14  
15  
16  
17  
18  
19  
20  
21  
22  
23  
24  
25  
26  
27  
28  
29  
30  
31  
32  
33  
34  
35  
36  
37  
38  
39  
40  
41  
42  
43  
44  
45  
46  
47  
48  
49  
50  
51  
52  
53  
54  
55  
56  
57  
58  
59  
60

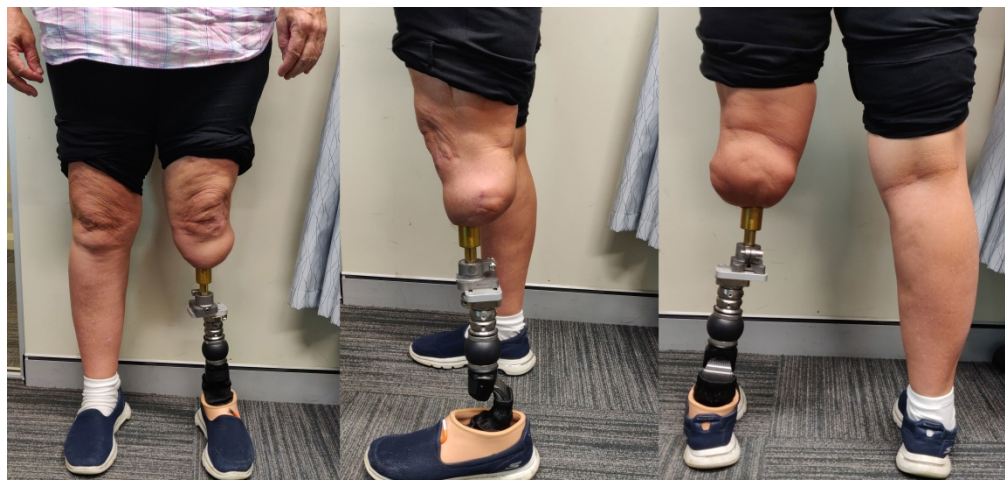

Figure 10: After fitting of prosthetic limb in a short residuum tibia  
2417x1145mm (72 x 72 DPI)

# BMJ Open

## Osseointegrated Reconstruction and Rehabilitation of Transtibial Amputees: the Osseointegration Group of Australia surgical technique and protocol for a prospective cohort study

|                                 |                                                                                                                                                                                                                                                                                                                                                                                                                                                                                                                                                                                                                                                                                                                                                                                                                                                                                   |
|---------------------------------|-----------------------------------------------------------------------------------------------------------------------------------------------------------------------------------------------------------------------------------------------------------------------------------------------------------------------------------------------------------------------------------------------------------------------------------------------------------------------------------------------------------------------------------------------------------------------------------------------------------------------------------------------------------------------------------------------------------------------------------------------------------------------------------------------------------------------------------------------------------------------------------|
| Journal:                        | <i>BMJ Open</i>                                                                                                                                                                                                                                                                                                                                                                                                                                                                                                                                                                                                                                                                                                                                                                                                                                                                   |
| Manuscript ID                   | bmjopen-2020-038346.R1                                                                                                                                                                                                                                                                                                                                                                                                                                                                                                                                                                                                                                                                                                                                                                                                                                                            |
| Article Type:                   | Protocol                                                                                                                                                                                                                                                                                                                                                                                                                                                                                                                                                                                                                                                                                                                                                                                                                                                                          |
| Date Submitted by the Author:   | 21-Jun-2020                                                                                                                                                                                                                                                                                                                                                                                                                                                                                                                                                                                                                                                                                                                                                                                                                                                                       |
| Complete List of Authors:       | Haque, Russel; Macquarie University Hospital, Department of Orthopaedic Surgery; Macquarie University Hospital, The Limb Reconstruction Discipline<br>Al-Jawazneh, Shakib; Macquarie University Hospital, Department of Orthopaedic Surgery; The University of Sydney, Faculty of Medicine and Health<br>Hoellwarth, Jason; Macquarie University Hospital, Department of Orthopaedic Surgery<br>Akhtar, Muhammad Adeel; NHS Fife, Depart of Orthopaedic Surgery<br>Doshi, Karan; Macquarie University Hospital, Department of Orthopaedic Surgery<br>Tan, Yao Chang; Macquarie University<br>Lu, William; Macquarie University,<br>Roberts, Claudia; Macquarie University Hospital, The Limb Reconstruction Discipline<br>Al Muderis, Munjed; Macquarie University Hospital, Department of Orthopaedic Surgery; Macquarie University Hospital, The Limb Reconstruction Discipline |
| <b>Primary Subject Heading</b>: | Surgery                                                                                                                                                                                                                                                                                                                                                                                                                                                                                                                                                                                                                                                                                                                                                                                                                                                                           |
| Secondary Subject Heading:      | Surgery                                                                                                                                                                                                                                                                                                                                                                                                                                                                                                                                                                                                                                                                                                                                                                                                                                                                           |
| Keywords:                       | ORTHOPAEDIC & TRAUMA SURGERY, REHABILITATION MEDICINE, Limb reconstruction < ORTHOPAEDIC & TRAUMA SURGERY, PLASTIC & RECONSTRUCTIVE SURGERY                                                                                                                                                                                                                                                                                                                                                                                                                                                                                                                                                                                                                                                                                                                                       |
|                                 |                                                                                                                                                                                                                                                                                                                                                                                                                                                                                                                                                                                                                                                                                                                                                                                                                                                                                   |

SCHOLARONE™  
Manuscripts





I, the Submitting Author has the right to grant and does grant on behalf of all authors of the Work (as defined in the below author licence), an exclusive licence and/or a non-exclusive licence for contributions from authors who are: i) UK Crown employees; ii) where BMJ has agreed a CC-BY licence shall apply, and/or iii) in accordance with the terms applicable for US Federal Government officers or employees acting as part of their official duties; on a worldwide, perpetual, irrevocable, royalty-free basis to BMJ Publishing Group Ltd ("BMJ") its licensees and where the relevant Journal is co-owned by BMJ to the co-owners of the Journal, to publish the Work in this journal and any other BMJ products and to exploit all rights, as set out in our [licence](#).

The Submitting Author accepts and understands that any supply made under these terms is made by BMJ to the Submitting Author unless you are acting as an employee on behalf of your employer or a postgraduate student of an affiliated institution which is paying any applicable article publishing charge ("APC") for Open Access articles. Where the Submitting Author wishes to make the Work available on an Open Access basis (and intends to pay the relevant APC), the terms of reuse of such Open Access shall be governed by a Creative Commons licence – details of these licences and which [Creative Commons](#) licence will apply to this Work are set out in our licence referred to above.

Other than as permitted in any relevant BMJ Author's Self Archiving Policies, I confirm this Work has not been accepted for publication elsewhere, is not being considered for publication elsewhere and does not duplicate material already published. I confirm all authors consent to publication of this Work and authorise the granting of this licence.

1  
2  
3  
4  
5  
6  
7  
8  
9  
10  
11  
12

## Osseointegrated Reconstruction and Rehabilitation of Transtibial Amputees: the Osseointegration Group of Australia surgical technique and protocol for a prospective cohort study

Russel Haque<sup>1,2,5</sup>, Shakib Al-Jawazneh<sup>1,3,5</sup>, Jason Shih Hoellwarth<sup>1</sup>, Muhammad Adeel Akhtar<sup>1,4</sup>, Karan Doshi<sup>1,2</sup>, Yao Chang Tan<sup>5</sup>, William Lu<sup>5</sup>, Claudia Roberts<sup>2</sup>, Munjed Al Muderis<sup>1,2,5</sup>

1. Department of Orthopaedic Surgery, Macquarie University Hospital, Sydney, New South Wales, 2109, Australia
2. The Limb Reconstruction Discipline, Macquarie University Hospital, Sydney, New South Wales, Australia
3. Faculty of Medicine and Health, University of Sydney, New South Wales, Australia
4. NHS Fife, Victoria Hospital, Kirkcaldy, Scotland, United Kingdom.
5. Osseointegration Group of Australia, 2 Technology Place, Macquarie University, NSW 2220 Australia

23  
24  
25  
26  
27

### \*Corresponding author:

28  
29  
30  
31  
32  
33

William Lu

Osseointegration Group of Australia, 2 Technology Place, Macquarie University, NSW 2220 Australia

34  
35  
36  
37  
38  
39  
40  
41  
42  
43  
44  
45  
46  
47  
48  
49  
50  
51  
52  
53  
54  
55  
56  
57  
58  
59  
60

Phone: +61 0468805858

Email: [research@osseointegrationaustralia.com.au](mailto:research@osseointegrationaustralia.com.au)

Keywords: Osseointegration; Lower limb amputees; Transtibial

## Abstract

### Introduction

Lower extremity amputation uniformly impairs a person's vocational, social, and recreational capacity. Rehabilitation in Traditional Socket Prostheses (TSP) is associated with a spectrum of complications involving the socket-residuum interface which lead to reduced prosthetic use and quality of life. Osseointegration has recently emerged as a novel concept to overcome these complications by eliminating this interface and anchoring the prosthesis directly to bone. Though the complications of TSPs affect both transfemoral and transtibial amputees, Osseointegration has been predominantly performed in transfemoral ones assuming a greater benefit/risk ratio. However, as the safety of the procedure has been established, we intend to extend the concept to transtibial amputees and document the outcomes.

### Methods and analysis

This is protocol for a prospective cohort study, with patient enrollment started in 2014 and expected to be completed by 2022. The inclusion criteria are age over 18 years, unilateral, bilateral and mixed transtibial amputation and experiencing socket-related problems. All patients receive Osseointegrated implants, the type of which depend on the length of the residuum and quality of bone, which are press-fitted into the residual bone. Objective functional outcomes comprising 6-minute walk test, Timed Up-and-Go test and K level, subjective patient-reported-quality-of-life outcomes (SF-36, daily prosthetic wear hours, prosthetic wear satisfaction) and adverse events are recorded preoperatively and at post-operative follow-up intervals of 3, 6, 12 months and yearly, and compared to the pre-operative values using appropriate statistical tests. Multivariable multilevel logistic regression will be performed with a focus to identify factors associated with outcomes and adverse events, specifically infection, periprosthetic fracture, implant fracture, and aseptic loosening.

### Ethics and dissemination

The Ethics approval for the study has been received from the University of Notre Dame, Sydney, Australia (014153S). The outcomes of this study will be disseminated by publications in peer-reviewed academic journals and scientific presentations at relevant orthopaedic conferences.

### Strengths and Limitations of the study

- This study will be the first major one to focus on transtibial osseointegration only and will have the largest cohort reported in literature so far.

- The findings of the study would assess whether osseointegration in transtibial amputees is feasible in terms of risks and benefits and also make an important contribution to the otherwise limited literature regarding outcomes of osseointegration in lower extremity amputations.
- The data may also help provide a foundation for estimating societal impact of transtibial osseointegration, particularly the true economic impact as compared to traditional socket prostheses by indirect means.
- It does not have a control group and therefore comparison of outcomes of transtibial osseointegration directly with traditional socket prostheses used by transtibial amputees is not possible.
- The study has a follow-up period of minimum 2 years, which does not allow the examination of longer term outcomes and risk of adverse events as well as long term survivorship

## Introduction

Amputation of a lower extremity not only causes changes in the anatomy and function of the limb but also almost inevitably results in major impairments of the person's vocational, social and recreational abilities and overall quality of life.<sup>1</sup> The focus of management of extremity amputations has evolved over time due to advancement of medical technology from prevention of mortality to overcoming these impairments and improving quality of life.<sup>2</sup> For centuries, the conventional way of rehabilitating such individuals has been via traditional socket mounted prostheses (TSP),<sup>3</sup> and despite significant technological innovations to both socket materials and design, there has been very little change to the overall prosthetic-residuum interface from a moulded compression cone to modern suction-based socket suspension.<sup>4</sup>

The use of TSP is associated with a spectrum of complications arising mainly out of the socket-residuum-interface that causes reduction in prosthesis use, ability to mobilize and quality of life.<sup>1, 5-7</sup> These include skin problems such as infections, and skin breakdown due to chronic irritation and thermal injury,<sup>8-11</sup> mechanical problems such as suboptimal fit, pain and pistoning<sup>12</sup> and problems with proprioception that leads to loss of balance and falling.<sup>13</sup> Gait with a TSP has been found to be asymmetrical correlating with a weakness in the hip abductor muscles, which can explain the back pain and pain in other regions experienced by such users including ipsilateral and contralateral limb, buttocks, neck and shoulder.<sup>14</sup> Socket prostheses users account for their poor quality of life mostly to physical disability, pain and decreased energy levels.<sup>5, 15</sup>

In order to overcome these complications, a significantly different concept has emerged over the past two decades, which circumvents the socket-residuum-interface completely by anchoring the prosthesis directly to the bone, popularly known as Osseointegration.<sup>16</sup> It involves insertion of porous metal implant in the medullary cavity of the bone in a screw or press-fit technique, over which compact cortical bone grows without any intervening soft

1  
2  
3 tissue in a short course of time, integrating the implant structurally and functionally to the  
4 bone.<sup>17</sup>  
5

6  
7 This integration of nonvital component into living bone was first discovered serendipitously  
8 in 1950s in rabbit models<sup>4</sup> and has been well established in the field of dentistry for the  
9 treatment of edentulous jaws for many years with a 10-year survival of dental implants in  
10 mandibular bone of 95%.<sup>18-21</sup> Since its first introduction in 1990s in individuals with  
11 amputations, osseointegration has been predominantly used for the treatment of  
12 individuals with transfemoral amputation demonstrating multiple potential advantages such  
13 as improved walking ability, daily prosthetic use, reduced energy consumption, sitting  
14 comfort and osseoperception.<sup>7, 22, 23</sup> This results in improved mobility and quality of life for  
15 individuals with amputations.<sup>1, 7, 22, 24</sup>  
16  
17  
18  
19

20 Over the last few years multiple studies have been published investigating the safety of this  
21 procedure, especially in individuals with transfemoral amputations, as incorporating a metal  
22 implant into the bone, whilst having an open connection with the outside environment can  
23 give rise to substantial concerns regarding the risk of ascending infection and concomitant  
24 implant loosening or sepsis.<sup>25-31</sup> Multiple studies reported that despite frequent colonization  
25 around the skin-implant interface, the implant system caused few infections leading to  
26 disability or implant removal (average 4%).<sup>25-31</sup> Most encountered complications were soft  
27 tissue infections or redundancy of soft tissue possibly influenced by learning curve and  
28 iteration of surgical technique and implant design.<sup>25, 29</sup>  
29  
30  
31  
32

33 Osseointegration has been predominantly used in transfemoral amputees (TFA) as  
34 compared to transtibial amputees (TTA), due to apparently greater benefit-risk ratio with  
35 the TFA being perceived to have more socket related problems and poorer mobility as  
36 compared to TTAs and the extent of risks or complications of the new procedure largely  
37 unknown.<sup>15, 32-34</sup> Due to the same reasons, commercial availability of approved standard  
38 implants for TFA only promoted its use. Furthermore, it is much easier to press-fit or insert a  
39 screw fixation implant in to a cylindrical cortical bone such as a femur as opposed to the  
40 reverse pyramid shaped cancellous bone of the proximal tibia<sup>26</sup>. It is very challenging to  
41 press fit an implant into cancellous bone and achieve immediate stability. The same  
42 principles apply to a screw fixation device.  
43  
44  
45  
46  
47

48 With the establishment of safety of this procedure in literature, there is enough justification  
49 now for its use in individuals with TTA. Firstly, the prevalence of transtibial amputations is  
50 much higher than transfemoral amputations.<sup>35, 36</sup> Of these individuals using socket  
51 prostheses, 40% experience at least one skin problem, with the percentage substantially  
52 higher in individuals with TTA (TTA: 45.8%, TFA: 20%; OR: 4.1). Secondly, there is increased  
53 percentage of stump pain reported in patients with TTA.<sup>8, 37</sup> Thirdly, suboptimal socket fit  
54 occurs in both individuals with TTA and with TFA (TTA: 59%, TFA: 78%)<sup>38</sup> and dissatisfaction  
55 with socket prostheses does not differ when comparing for level of amputation, with only  
56 43% being satisfied with the comfort of their prosthesis.<sup>39-41</sup> These problems are inherently  
57  
58  
59  
60

1  
2  
3 linked to intolerance of the prosthesis<sup>12</sup> and impact the ability of TTA to become  
4 independently mobile.<sup>42</sup>  
5

6  
7 Until recently, there is very little data assessing the protocol, techniques and results of  
8 Osseointegration in individuals with TTA. Only few papers with very small case series have  
9 been published with variable results.<sup>26, 28, 43, 44</sup>  
10

## 11 **Study objectives**

12  
13  
14 The overall objective of this study is to assess the safety and efficacy of transtibial  
15 osseointegration procedure with at least 2 year follow-up and to compare the benefits and  
16 risks from pre-operative status and with the previously reported outcomes for transfemoral  
17 osseointegration. Specifically, this would involve:  
18

19 1. Assessing the objective functional outcomes with the 6 Minute Walk Test (6MWT)  
20 <sup>45</sup>, Timed Up and Go (TUG) <sup>46</sup> and K-levels<sup>47</sup>, compared with preoperative data and with  
21 outcomes of TFA.  
22

23 2. Assessing the subjective patient-reported quality-of-life outcomes with the Short  
24 Form Health Survey 36 (SF-36)<sup>48</sup>, Stump Pain, Daily prosthetic wear hours and Prosthetic  
25 wear satisfaction compared with preoperative data and with outcomes of TFA.  
26

27 3. Examining the prevalence of adverse events, including infection, revision surgery,  
28 fractures, aseptic loosening and implant failures, and compare with the adverse events after  
29 TFA.  
30

31 One of the primary objectives of this study is to identify the individual patient characteristics  
32 or factors that have a positive or negative influence in the outcomes mentioned above. This  
33 analysis in a regression model would help to identify the patients based on their  
34 characteristics who would be most or least benefitted with this novel procedure and who  
35 would be at a higher or lower risk of failure.  
36  
37

38  
39 The other question that is study will identify is the rate of additional surgical interventions  
40 as well as to identify factors associated with further surgery, specifically for infection,  
41 periprosthetic fracture, implant fracture, and aseptic loosening  
42  
43  
44

## 45 **Methods and analysis**

46  
47 This is a prospective cohort study which is designed to assess the safety and efficacy of  
48 Transtibial Osseointegration procedure with a minimum of 2 years (range 2-8 years) follow-  
49 up.  
50

51  
52 Preliminary data and clinical experience has been obtained from an initial pilot study  
53 comprising 10 patients owing to absence of prior literature. Software G\* Power was used to  
54 calculate an a priori sample size. Considering SF-36 physical component score as primary  
55 outcome measure, the pre-operative and 2 year post-operative scores were recorded.  
56 Comparing the means (37.62 and 44.83) and SDs (11.8 and 19.5) of these 2 groups  
57 respectively using Wilcoxon test, the effect size was calculated to be 0.36 and sample size  
58 was calculated to be 87 assuming  $\alpha$  error to be 0.05 and in order to achieve a Power of 95  
59  
60

1  
2  
3 % . Considering a drop-out rate of 20%, a final sample size of 109 was decided upon. None of  
4 the patients of the pilot study have been included in this study due to absence of standard  
5 protocol.  
6  
7

8 The first patient enrolled in the study was in April 2014. Enrolment is ongoing at the time of  
9 publication of this paper, with 68 patients already enrolled and is expected to be completed  
10 by April 2022. The number of patients treated each year has shown a steep rising trend with  
11 about 26 patients enrolled in the study last year.  
12  
13

## 14 Patient selection

### 15 Eligibility criteria

16  
17 The Ethics approval for the study has been received from the University of Notre Dame,  
18 Sydney, Australia (014153S). All participants gave their informed consent. Inclusion and  
19 Exclusion criteria along-with rationale are listed in Table 1.  
20  
21  
22  
23

24 **Table 1: Inclusion and Exclusion Criteria with Reason**

| 25 Inclusion Criteria                                                                                                                                                                                                                                       |                                                                                                                                                                                                                                                       |
|-------------------------------------------------------------------------------------------------------------------------------------------------------------------------------------------------------------------------------------------------------------|-------------------------------------------------------------------------------------------------------------------------------------------------------------------------------------------------------------------------------------------------------|
| 26 Criteria                                                                                                                                                                                                                                                 | 27 Reason                                                                                                                                                                                                                                             |
| 28 Age at least 18 years                                                                                                                                                                                                                                    | 29 Legal self-consent                                                                                                                                                                                                                                 |
| 30 Current unilateral, bilateral or mixed<br>31 transtibial amputees with significant<br>32 dissatisfaction regarding prosthesis fit or<br>33 pain, mobility, or skin breakdown                                                                             | 34 Objective, identifiable deficit in current<br>35 patient lifestyle                                                                                                                                                                                 |
| 36 Patients with a full lower limb but with<br>37 pain, deformity, or weakness distal to the<br>38 mid-tibia who desired amputation for pain<br>39 management or improved mobility<br>40 following removal of the deformed or weak<br>41 joint and muscles. | 42 Objective, identifiable quality of life<br>43 impairment that can be objectively<br>44 improved by amputation, and patients<br>45 likely would experience better<br>46 rehabilitation with osseointegration than<br>47 standard socket prosthesis. |
| 48 Patients with recent amputations who<br>49 wished to try osseointegration instead of a<br>50 traditional socket prosthesis.                                                                                                                              | 51 Honoring patient choice                                                                                                                                                                                                                            |
| 52 Patient with sufficient resources and<br>53 willingness to pursue surgery, post-<br>54 operative rehabilitation, and prosthesis<br>55 procurement.                                                                                                       | 56 Rehabilitation and prosthesis fitting are all<br>57 required for appropriate, safe improvement<br>58 following osseointegration surgery.                                                                                                           |
| 59                                                                                                                                                                                                                                                          |                                                                                                                                                                                                                                                       |
| 60 Exclusion Criteria                                                                                                                                                                                                                                       |                                                                                                                                                                                                                                                       |
| Criteria                                                                                                                                                                                                                                                    | Reason                                                                                                                                                                                                                                                |
| Active infection any location                                                                                                                                                                                                                               | Unacceptably high and modifiable infection risk                                                                                                                                                                                                       |
| Active malignancy or ongoing/planned treatment for malignancy at any location                                                                                                                                                                               | High risk for infection, impaired biology for osseointegration, impaired patient stamina for rehabilitation                                                                                                                                           |



|                                                                                                                               |                                                                                                                                                                               |
|-------------------------------------------------------------------------------------------------------------------------------|-------------------------------------------------------------------------------------------------------------------------------------------------------------------------------|
| Skeletal immaturity                                                                                                           | Unknown risk given the current knowledge of osseointegration outcomes and biological impact                                                                                   |
| Amputee with no mobility, socket, or skin problems                                                                            | No expected immediate, and uncertain eventual, benefit from additional surgical intervention                                                                                  |
| Patients with psychiatric concern identified during pre-operative consultation with psychiatrist                              | Minimize risk of performing surgery for a patient whose expressed deficits are psychiatric-based instead of musculoskeletal-based, and thus unlikely to improve with surgery. |
| Patients considered too medically ill, too muscularly weak, or insufficiently dedicated to improve following osseointegration | Avoid harming patients with surgery that may be either unlikely to benefit them or possibly pose a health risk.                                                               |
| Insufficient remaining tibia length to accept an implant                                                                      | Avoid performing surgery for a patient who would be unlikely to achieve successful bone ingrowth to the implant                                                               |
| Uncontrolled diabetes mellitus                                                                                                | Avoid unnecessary, modifiable risk for infection                                                                                                                              |
| Females currently or intending to become pregnant within the year following surgery                                           | Unnecessary risk to fetus due to potential for falls or other unforeseen adverse events                                                                                       |

## Patient recruitment

### Setting and Patient Screening

Our surgical practice is located in a private university hospital in a major urban city with full, modern medical capabilities. Local patient referral can occur via the usual routes for our practice: from the general practitioner or by self-referral. Non-local patients within the country and international patients can also contact our office, as is typical already, and are encouraged to provide information for pre-evaluation. All patients being referred for, or requesting, osseointegration are required to complete an online Patient Screening Form. Those patients fitting our Inclusion and Exclusion criteria are invited for in-person consultation. Patients who sustain acute traumatic injuries for which amputation is recommended can request osseointegration as primary management, either acutely or following the resolution of their acute injury.

### Patient Enrolment

All patients who complete the online Patient Screening Form and fit the inclusion/exclusion criteria are evaluated in the multidisciplinary Limb Reconstruction Clinic. The typical medical team includes at least three orthopaedic surgeons with extensive limb reconstruction experience. Also in attendance are a prosthetist and physiotherapist, to ensure the patient's complaints are not suitably improved by prosthesis adjustment or therapy. Patients are also evaluated by our psychiatrist to ensure absence of psychiatric conditions that can affect



1  
2  
3 post-operative rehabilitation. For patients who have neuropathic pain or a history of  
4 narcotic or other pain-related medication use or abuse, a pain medicine consultation is  
5 required. All patients who elect for osseointegration are informed their care is provided at  
6 the best clinical judgment, but that they will be enrolled as part of a prospective and  
7 longitudinal study which aims to investigate the indications, evaluation of patients, surgical  
8 technique, rehabilitation strategies, management of adverse events, and long term  
9 outcomes of osseointegration patients. There is no arbitrary treatment based on assignment  
10 into a treatment category. Implant selection and exact surgical technique is expressly  
11 tailored to each patient.  
12  
13  
14

15 The time between patient enrolment and surgery will vary. Patients who have a traumatic  
16 injury and have inpatient consultation may have osseointegration the next day. Healthy  
17 patients with streamlined financial coverage and who are able to attain psychiatric  
18 evaluation quickly could have surgery within a week of consultation. For patients who do  
19 not have appropriate insurance coverage, there is a waiting period for the most appropriate  
20 coverage level of one year; and during that waiting time would be recommended to  
21 participate in pre-habilitation exercises and have other perioperative optimization  
22 performed.  
23  
24  
25

#### 26 Potential Selection Bias

27 We believe the relatively broad Inclusion and Exclusion criteria allow a very broad cohort of  
28 patients who we believe are medically and cognitively safe for osseointegration to be  
29 treated. One possible bias, if any, will be low income patients. Osseointegration is a very  
30 expensive surgery and thus is not covered by the standard government insurance for our  
31 country. It is covered by more premium insurance plans. Thus we counsel patients to enroll  
32 in these top level insurance plans so that not only will the surgery itself be provided but any  
33 additional surgery for an adverse event will be covered, so long as they maintain their  
34 coverage. Patients who choose to pay out of pocket are also permitted to do so, but are  
35 extensively counselled that additional surgery for infection, fracture, or soft tissue  
36 management may be required, sometimes without time to plan ahead. Based on our  
37 country's population, we expect the vast majority of patients will be of Caucasian descent;  
38 we do not make any inclusion or exclusion decisions based on patient nationality, ethnic  
39 background or religion.  
40  
41  
42  
43  
44  
45

#### 46 Study intervention

#### 47 Preoperative management

48 All the patients are assessed with AP and lateral plain radiographs of the residuum to assess  
49 the bone quality and presence of any anomaly. Long leg standing radiographs are performed  
50 to assess the mechanical alignment of the lower limbs and to rule out pathologies in the  
51 contralateral limb. DEXA scans of the proximal femora and the spine to assess the bone  
52 mineral density which would help determine the speed of post-operative rehabilitation.  
53 Furthermore, CT scans of the residual bone are performed to plan for the type of implant  
54 and required size..  
55  
56  
57  
58  
59  
60

### Osseointegration Implant

The Transtibial Osseointegration implant used by us for, was designed by senior author (MAM) into mainly two types. For longer residuums with sufficient cortical bone, a standard titanium implant which was machine manufactured of 160mm length with plasma spraying on the surface was used (Figure 1). Alternatively, for short residuums with metaphyseal bone a custom-made short stem titanium implant with coarser surface structure was either machine manufactured or 3D printed. The surface of the implant is composed of a macroporous mesh-like structure allowing for bone ingrowth. Some implants contain longitudinal flanges for additional rotational stability. All implants are connected to a dual cone adapter with Morse-taper ends connecting the implant with the external prosthesis. The surface of the dual cone adapter is highly polished and coated with titanium-niobium oxide, an alloy known to have bacterial repellent properties<sup>4</sup>, which also facilitates the excursion of the soft tissues and skin over it avoiding adhesions. A safety mechanism is built into the dual cone, with a safety pin that breaks to reduce the chance of periprosthetic fractures or implant breakage.

### Surgical Technique

All patients receive an osseointegrated implant in a single-stage surgery. At the level of the distal stump, a horizontal elliptical incision is made, the amount of soft tissue and muscle tissue is minimalized and all nerves are sharply severed and vessels are ligated or cauterized until hemostasis is achieved. The saphenous, tibial and common peroneal nerves are re-innervated to surrounding muscle branches if symptoms of nerve pain or excessive phantom pain existed pre-operatively (Figure 2). Alternatively, the re-innervation of tibial and common peroneal nerves can be performed via a separate lateral distal thigh incision and posterior dissection.

Care is taken to preserve the periosteum at all times. If the distal end of the tibia needs to be re-cut, the periosteum is elevated and re-sutured to the end of the bone after using an oscillating saw for the distal tibia osteotomy. The fibula is usually cut 2-3 cm shorter than the tibia using the saw.

The intramedullary canal is prepared depending on the length of the residuum. If the amputation is at the diaphysial level with good cortical bone distally then reaming up to 0.5 mm larger than the definite implant anticipated to be used after cortical chatter is heard (Figure 3) followed by sequential broaching up to the size of the desired implant (Figure 4). If the tibial stump is at the metaphyseal level with poor quality bone then no reaming is done and only impaction broaching is performed usually stopping at 2 mm smaller than the definite size of the implant. Both reaming and broaching is performed under image intensifier guidance to ensure accurate positioning in the centre of the tibia on the AP and lateral planes. Finally, the distal edge of the tibia is smoothed with use of a face-reamer (Figure 5).

Final implantation of the osseointegration intramedullary component is done using press-fit technique up to the subchondral bone of the proximal tibia (Figure 6). To stabilize the implant in shorter residual stumps, multiple locking screws were initially used, before it was abandoned due to increased risk of loosening and no added benefits.

Closure is initiated by suturing the fascia to the periosteum all around at the distal end of the tibial stump in a 'purse-string' fashion. This has not been described previously for tibias and is unique to our group. The anterior and posterior soft tissue sleeves are refashioned to remove subcutaneous fat. A flap is created-preferably anterior, to cover the end of the stump and to begin closure in layers. A sharp corer is used to make a stoma in the flap to communicate to the exact diameter of the implant, before progressing to close the rest of the wound in layers. Alternatively, the anterior and posterior flaps are closed around the implant in a 'fish-mouth' fashion (Figure 7). After this step, the dual cone component of the osseointegration device is inserted and secured with an internal locking screw, followed by fixing the taper sleeve and bushing to the dual cone using an external screw, all the time securing the implant to prevent rotation using a special device (Figure 8 and 9).

### Postoperative Rehabilitation

The rehabilitation for transtibial osseointegration is carried out in phases and described in details in Figure 10 and 11. The adherence to the rehabilitation protocol is recorded in the database by the physiotherapist. Following the fitting of a prosthetic limb (Figure 12), patients are encouraged to weight-bear daily on their prosthesis using two crutches for six weeks and then one crutch on the opposite side for a further six weeks and then unaided thereafter

### Outcome

#### Data sampling

Data sampling is done at baseline pre-operatively and post-operatively at 3, 6 and 12 months and yearly follow-ups thereafter. It is done by dedicated research assistants who are unaware of the details of patients' demographic characteristics, surgical and implant details and previous scores to reduce the risk of any bias. Clinical information from surgery and follow-ups are added to the database by the operating or reviewing surgeon. Data that is sampled including the time points of measurement are tabulated in Table 2.

**Table 2: Data Sampling Table showing the parameters sampled and time points of measurement**

| Parameter Sampled | Details | Time point of measurement |
|-------------------|---------|---------------------------|
| Name              |         | T0                        |
| Date of Birth     |         | T0                        |
| Address           |         | T0                        |

|    |                                       |                                                                                                                                             |                |
|----|---------------------------------------|---------------------------------------------------------------------------------------------------------------------------------------------|----------------|
| 1  |                                       |                                                                                                                                             |                |
| 2  |                                       |                                                                                                                                             |                |
| 3  | Phone number/Email                    |                                                                                                                                             | T0             |
| 4  | Gender                                |                                                                                                                                             | T0             |
| 5  | Height                                |                                                                                                                                             | T0             |
| 6  | Weight                                |                                                                                                                                             | T0             |
| 7  | Military                              | Yes/No                                                                                                                                      | T0             |
| 8  | Athlete                               | Yes/No                                                                                                                                      | T0             |
| 9  | Race                                  |                                                                                                                                             | T0             |
| 10 | Education Level                       |                                                                                                                                             | T0             |
| 11 | Employment status before OI surgery   |                                                                                                                                             | T0             |
| 12 | Type of occupation before OI surgery  |                                                                                                                                             | T0             |
| 13 | Age at 1 <sup>st</sup> Surgery        |                                                                                                                                             | T0             |
| 14 | Date of 1 <sup>st</sup> Surgery       |                                                                                                                                             | T0             |
| 15 | Any Further surgeries                 | Yes/No. Dates of further surgeries if Yes                                                                                                   | When it occurs |
| 16 | Side                                  |                                                                                                                                             | T0             |
| 17 | Bilateral                             | Yes/No                                                                                                                                      | T0             |
| 18 | Mixed                                 | Yes/No                                                                                                                                      | T0             |
| 19 | Same Day Amputation and OI            | Yes/No                                                                                                                                      | T0/TS          |
| 20 | Cause of Amputation                   | Each cause assigned a number                                                                                                                | T0             |
| 21 | Date of amputation                    |                                                                                                                                             | T0             |
| 22 | Co-Morbidities                        | Each cause assigned a number                                                                                                                | T0             |
| 23 | Psychiatric evaluation before surgery | Yes/No                                                                                                                                      | T0             |
| 24 | Depression                            | Yes/No                                                                                                                                      | T0             |
| 25 | Alcohol >3/day                        | Yes/No                                                                                                                                      | T0             |
| 26 | TMR at index surgery                  | Yes/No                                                                                                                                      | T0             |
| 27 | Reasons for Osseointegration          | Fit Problems/ Skin Problems/ Painful prosthesis/Prosthetic Mobility Dissatisfaction/ Other Pain/ Other causes. Each cause assigned a number | T0             |
| 28 | Implant Details                       | Implant Brand, Type, Manufacture method, Collared/Flared, Width, Length                                                                     | TS             |
| 29 | Retention of Hardware                 | None/Cable/Screw/Both                                                                                                                       |                |
| 30 | Implant Removal                       |                                                                                                                                             | When it occurs |
| 31 | Reason for removal                    |                                                                                                                                             | When it occurs |
| 32 | Years to Fail                         |                                                                                                                                             | When it occurs |
| 33 | Re-implant date                       |                                                                                                                                             | When it occurs |
| 34 | Further surgeries details             | Washouts/Neurectomy/Refashioning/ Periprosthetic Fractures/Other Surgeries details                                                          | When it occurs |
| 35 | Antibiotics administration            | Intravenous/ Oral. Details                                                                                                                  | When it occurs |
| 36 | Other Adverse events                  |                                                                                                                                             | When it occurs |
| 37 | Length of Residuum                    |                                                                                                                                             | T0             |
| 38 | Length after OI                       |                                                                                                                                             | TS             |
| 39 | Pre-Op Weight Bearing status          |                                                                                                                                             | T0             |
| 40 | Pre-Op K Level                        |                                                                                                                                             | T0             |
| 41 | Pre-Op Walking Aid                    |                                                                                                                                             | T0             |
| 42 | Pre-Op 6 Minute Walk Test             |                                                                                                                                             | T0             |
| 43 | Pre-Op Timed Up-and-Go Test           |                                                                                                                                             | T0             |
| 44 | Pre-Op SF-36 (PCS)                    |                                                                                                                                             | T0             |
| 45 |                                       |                                                                                                                                             |                |
| 46 |                                       |                                                                                                                                             |                |
| 47 |                                       |                                                                                                                                             |                |
| 48 |                                       |                                                                                                                                             |                |
| 49 |                                       |                                                                                                                                             |                |
| 50 |                                       |                                                                                                                                             |                |
| 51 |                                       |                                                                                                                                             |                |
| 52 |                                       |                                                                                                                                             |                |
| 53 |                                       |                                                                                                                                             |                |
| 54 |                                       |                                                                                                                                             |                |
| 55 |                                       |                                                                                                                                             |                |
| 56 |                                       |                                                                                                                                             |                |
| 57 |                                       |                                                                                                                                             |                |
| 58 |                                       |                                                                                                                                             |                |
| 59 |                                       |                                                                                                                                             |                |
| 60 |                                       |                                                                                                                                             |                |

|                                                                                                                             |                                                                                                               |                   |
|-----------------------------------------------------------------------------------------------------------------------------|---------------------------------------------------------------------------------------------------------------|-------------------|
| Pre-Op SF-36 (MCS)                                                                                                          |                                                                                                               | T0                |
| Pre-op Subjective                                                                                                           | Functional Level and Problems. "How would you summarise your level of function with your current prosthesis?" | T0                |
| Pre-Op Stump Pain (VAS)                                                                                                     |                                                                                                               | T0                |
| Daily Prosthetic Wear Hours                                                                                                 |                                                                                                               | T0                |
| Prosthetic Wear Satisfaction                                                                                                |                                                                                                               | T0                |
| Adherence to Rehabilitation Protocol                                                                                        | Yes/No                                                                                                        | TR                |
| Post-Op Weight Bearing status                                                                                               |                                                                                                               | T1, T2, T3, T4... |
| Post-Op K Level                                                                                                             |                                                                                                               | T1, T2, T3, T4... |
| Post-Op Walking Aid                                                                                                         |                                                                                                               | T1, T2, T3, T4... |
| Post-Op 6 Minute Walk Test                                                                                                  |                                                                                                               | T1, T2, T3, T4... |
| Post-Op Timed Up-and-Go Test                                                                                                |                                                                                                               | T1, T2, T3, T4... |
| Post-Op SF-36 (PCS)                                                                                                         |                                                                                                               | T1, T2, T3, T4... |
| Post-Op SF-36 (MCS)                                                                                                         |                                                                                                               | T1, T2, T3, T4... |
| Post-op Subjective                                                                                                          | Functional Level and Problems. "How would you summarise your level of function with your current prosthesis?" | T1, T2, T3, T4... |
| Post-Op Stump Pain (VAS)                                                                                                    |                                                                                                               | T1, T2, T3, T4... |
| Daily Prosthetic Wear Hours                                                                                                 |                                                                                                               | T1, T2, T3, T4... |
| Prosthetic Wear Satisfaction                                                                                                |                                                                                                               | T1, T2, T3, T4... |
| T0: Pre-operative, TS: At Surgery, TR: During Rehabilitation, T1: 3 months, T2: 6 months, T3: 1 year, T4: 2 years and so on |                                                                                                               |                   |

### Adverse events

Adverse events are reported which includes infection that require administration of intravenous or oral antibiotics or surgical intervention, periprosthetic fracture, implant breakage, aseptic loosening, need for revision surgery or additional amputation and death. Severity of infections are assessed and graded into AI Muderis et al. classification system.<sup>25</sup>.

### Data analysis

The primary questions this study aim to identify are 1. the individual patient characteristics or factors that have a positive or negative influence in the outcomes measured or in other words who would be most or least benefitted with this novel procedure and who would be at a higher or lower risk of failure? and 2. what are the rates of additional intervention for patients undergoing transtibial osseointegration, and for what reasons? This project will also aim to collect data which can allow investigation of diverse questions regarding transtibial osseointegration as further insight develops.

Multivariable logistic regression will be performed with a focus to identify factors associated with further surgery, specifically for infection, periprosthetic fracture, implant fracture, and aseptic loosening. Additionally, factors associated with Daily prosthesis wear hours, Prosthetic wear satisfaction, SF-36 and mobility (6MWT, TUG, K level) will be evaluated.

1  
2  
3 Separate regression models will be developed for short and long residuum TTOIs as well. A  
4 p value of 0.05 will be the cutoff of significance. The p value for each regression identifying  
5 significant predictors of dependent variable outcome will be reported, as will the  
6 coefficients of relative influence of each variable.  
7  
8

9  
10 The pre- versus post-operative continuous value data will be presented as mean and  
11 standard deviation and compared with Student's T-test or analysis of variance (ANOVA) if  
12 the data is normally distributed. Should the data not be normally distributed the median  
13 and interquartile ranges will be reported and comparison made using Wilcoxon test.  
14  
15

16 For comparison of qualitative variables such as gender, laterality, or reason for amputation,  
17 frequency comparison will be performed using Chi-squared test or Fisher's Exact test,  
18 depending on the actual occurrence of each variable. P=0.05 will be considered statistically  
19 significant.  
20  
21

### 22 **Reducing risk of bias**

23  
24 In addition to reducing the risk of selection bias as described above, bias relating to surgeon  
25 expertise and protocol adherence is eliminated since all operations will be performed by a  
26 single primary surgeon. Bias related to data collection will be minimized by employing  
27 dedicated research assistants who will be unaware about details of patient demographic  
28 characteristics, surgical and implant details and previous recorded scores. Further, the  
29 results of functional outcome measures (6MWT, TUG, K-levels) depend on the patients'  
30 actual performance, while the results of subjective outcome measures are completely  
31 patient reported from surveys. In addition, the assessors will not be involved in data  
32 analysis.  
33  
34  
35  
36  
37

### 38 **Patient and public involvement**

39 Patients or the public were not involved in the design, or conduct, or reporting, or  
40 dissemination plans of our research.  
41  
42

### 43 **Ethics and Dissemination**

44  
45 All patients included in this study will sign a consent form that provides sufficient  
46 information about the study for patients to make an informed decision about their  
47 participation. Outcomes of the current study will be disseminated by publications in peer-  
48 reviewed academic journals and presentations at relevant orthopaedic conferences.  
49  
50  
51

### 52 **Discussion**

53  
54  
55 This study will be the first major one to focus on transtibial osseointegration only and will  
56 have the largest cohort reported in literature so far. The findings of the study would assess  
57 whether osseointegration in transtibial amputees is feasible in terms of risks and benefits  
58  
59  
60



1  
2  
3 and also make an important contribution to the otherwise limited literature regarding  
4 outcomes of osseointegration in lower extremity amputations. As evidenced by literature,  
5 transtibial amputees using TSP suffer from same difficulties involving skin breakdown<sup>8</sup>,  
6 suboptimal fit<sup>49</sup> and pain<sup>4</sup> as do the transfemoral ones, which ultimately affect their  
7 prosthetic use, mobility and overall quality of life. As the dramatically different concept of  
8 osseointegration proved life-changing in management of transfemoral amputees with  
9 established safety, it is only logical to extend the science to transtibial amputees and  
10 document the outcomes.  
11  
12  
13  
14

15 The challenges posed by TSP were overcome by direct anchorage of the implant to the bone  
16 that enabled physiological weight bearing<sup>17</sup>, increased flexibility and range of motion<sup>50</sup>,  
17 sitting comfort<sup>51</sup>, mechanoreception-based sensory feedback (osseoperception)<sup>23</sup>, improved  
18 donning and doffing<sup>24</sup>, better mobility<sup>7</sup> and improved prosthetic use<sup>24</sup>, body image<sup>49</sup> and  
19 quality of life<sup>24</sup>. The safety of the implant was established in subsequent studies in terms of  
20 stability and risk of infection.<sup>25</sup>  
21  
22  
23  
24

25 Although largely unreported in literature so far, the further application of osseointegration  
26 to transtibial amputees has been done in pilot project by our group to suitable patients as  
27 well as some other surgeons worldwide. Prospective outcomes at 12 months of five patients  
28 with peripheral vascular disease who underwent transtibial osseointegration was published  
29 recently by Al Muderis et al.<sup>43</sup> Results showed that all the patients enrolled in the study  
30 were able to mobilize unaided at final follow-up. There was notable improvement of  
31 objective functional measures of 6MWT and TUG as well as subjective functional measures,  
32 while only two superficial infections were noted which resolved with conservative  
33 treatment and no implant loosening or other adverse event documented. However, two  
34 previous studies from Germany<sup>26, 28</sup> reporting on nine individuals with transtibial  
35 amputations treated with their custom cobalt chrome implants reported an explantation  
36 rate of 43% and rates of both septic and aseptic loosening of 22% each, though patient  
37 eligibility, rehabilitation and follow-up is unclear.  
38  
39  
40  
41  
42  
43

44 Recently, another study comprising of a small number of nine transtibial patients having a  
45 follow-up of only 12 months has been reported from The Netherlands.<sup>44</sup> The cohort was a  
46 mixed one with majority (31 patients) being transfemoral patients. Comparison of outcomes  
47 between transtibial and transfemoral osseointegrated patients revealed higher overall  
48 baseline values in transtibial patients except walking distance in daily life and prosthetic  
49 comfort. Improvement in the outcome measures was also greater in transtibial patients  
50 (except hip abductor strength and prosthesis wearing time), and at final follow-up lesser  
51 transtibial patients experienced stump pain as compared to transfemoral patients  
52 (transfemoral: 20/31 (65%), transtibial: 2/9 (22%)). Major adverse events related to  
53 implants was recorded as 8% which included both groups and included three dual-cone  
54 breakages and four bone fractures (due to fall), which were all managed successfully.  
55 However, a lower uneventful course was noted in transtibial patients (44%) compared to  
56  
57  
58  
59  
60

1  
2  
3 transfemoral ones (61%). The authors concluded that transtibial osseointegration was both  
4 efficacious and safe at 12 months follow-up  
5

6  
7 Thus, the proposed study would comprise the largest cohort of Transtibial amputees  
8 undergoing Osseointegration with a substantial follow-up time. The clinical outcomes,  
9 adverse events, and their associations noted in this study would help considerably to set the  
10 standard of care in transtibial amputee patients and provide directions of further research  
11 in terms of implant design, surgical technique, rehabilitation or management of  
12 complications.  
13  
14  
15  
16  
17

## 18 References

- 19  
20  
21 1. Hagberg K, Branemark R. Consequences of non-vascular trans-femoral amputation: a survey  
22 of quality of life, prosthetic use and problems. *Prosthetics and orthotics international*.  
23 2001;25(3):186-94.
- 24 2. Hoyt BW, Walsh SA, Forsberg JA. Osseointegrated prostheses for the rehabilitation of  
25 amputees (OPRA): results and clinical perspective. *Expert review of medical devices*. 2020;17(1):17-  
26 25.
- 27 3. Thurston AJ. Pare and prosthetics: the early history of artificial limbs. *ANZ J Surg*.  
28 2007;77(12):1114-9.
- 29 4. Zaid MB, O'Donnell RJ, Potter BK, Forsberg JA. Orthopaedic Osseointegration: State of the  
30 Art. *The Journal of the American Academy of Orthopaedic Surgeons*. 2019;27(22):e977-e85.
- 31 5. Demet K, Martinet N, Guillemin F, Paysant J, Andre JM. Health related quality of life and  
32 related factors in 539 persons with amputation of upper and lower limb. *Disability and*  
33 *rehabilitation*. 2003;25(9):480-6.
- 34 6. Marx RG, Wilson SM, Swiontkowski MF. Updating the assignment of levels of evidence. *The*  
35 *Journal of bone and joint surgery American volume*. 2015;97(1):1-2.
- 36 7. Van de Meent H, Hopman MT, Frolke JP. Walking ability and quality of life in subjects with  
37 transfemoral amputation: a comparison of osseointegration with socket prostheses. *Archives of*  
38 *physical medicine and rehabilitation*. 2013;94(11):2174-8.
- 39 8. Dudek NL, Marks MB, Marshall SC, Chardon JP. Dermatologic conditions associated with use  
40 of a lower-extremity prosthesis. *Archives of physical medicine and rehabilitation*. 2005;86(4):659-63.
- 41 9. Ghoseiri K, Safari MR. Prevalence of heat and perspiration discomfort inside prostheses:  
42 literature review. *Journal of rehabilitation research and development*. 2014;51(6):855-68.
- 43 10. Lyon CC, Kulkarni J, Zimerson E, Van Ross E, Beck MH. Skin disorders in amputees. *Journal of*  
44 *the American Academy of Dermatology*. 2000;42(3):501-7.
- 45 11. Meulenbelt HE, Geertzen JH, Jonkman MF, Dijkstra PU. Determinants of skin problems of the  
46 stump in lower-limb amputees. *Archives of physical medicine and rehabilitation*. 2009;90(1):74-81.
- 47 12. Al Muderis MM, Lu WY, Li JJ, Kaufman K, Orendurff M, Highsmith MJ, et al. Clinically  
48 Relevant Outcome Measures Following Limb Osseointegration; Systematic Review of the Literature.  
49 *Journal of orthopaedic trauma*. 2018;32(2):e64-e75.
- 50 13. Hunter SW, Batchelor F, Hill KD, Hill AM, Mackintosh S, Payne M. Risk Factors for Falls in  
51 People With a Lower Limb Amputation: A Systematic Review. *Pm&R*. 2017;9(2):170-80.
- 52 14. Leijendekkers RA, van Hinte G, Frolke JP, van de Meent H, Nijhuis-van der Sanden MW, Staal  
53 JB. Comparison of bone-anchored prostheses and socket prostheses for patients with a lower  
54 extremity amputation: a systematic review. *Disability and rehabilitation*. 2017;39(11):1045-58.
- 55 15. Amtmann D, Morgan SJ, Kim J, Hafner BJ. Health-related profiles of people with lower limb  
56 loss. *Archives of physical medicine and rehabilitation*. 2015;96(8):1474-83.  
57  
58  
59  
60

16. Li Y, Branemark R. Osseointegrated prostheses for rehabilitation following amputation : The pioneering Swedish model. *Der Unfallchirurg*. 2017;120(4):285-92.
17. Overmann AL, Aparicio C, Richards JT, Mutreja I, Fischer NG, Wade SM, et al. Orthopaedic Osseointegration: Implantology and Future Directions. *Journal of orthopaedic research : official publication of the Orthopaedic Research Society*. 2019.
18. Adell R, Eriksson B, Lekholm U, Branemark PI, Jemt T. Long-term follow-up study of osseointegrated implants in the treatment of totally edentulous jaws. *Int J Oral Maxillofac Implants*. 1990;5(4):347-59.
19. Branemark PI, Adell R, Albrektsson T, Lekholm U, Lundkvist S, Rockler B. Osseointegrated titanium fixtures in the treatment of edentulousness. *Biomaterials*. 1983;4(1):25-8.
20. Branemark PI, Hansson BO, Adell R, Breine U, Lindstrom J, Hallen O, et al. Osseointegrated implants in the treatment of the edentulous jaw. Experience from a 10-year period. *Scand J Plast Reconstr Surg Suppl*. 1977;16:1-132.
21. Branemark R, Branemark PI, Rydevik B, Myers RR. Osseointegration in skeletal reconstruction and rehabilitation: a review. *Journal of rehabilitation research and development*. 2001;38(2):175-81.
22. Hagberg K, Hansson E, Branemark R. Outcome of percutaneous osseointegrated prostheses for patients with unilateral transfemoral amputation at two-year follow-up. *Archives of physical medicine and rehabilitation*. 2014;95(11):2120-7.
23. Hagberg K, Häggström E, Jönsson S, Rydevik B, Brånemark R. Osseoperception and Osseointegrated Prosthetic Limbs. 2008:131-40.
24. Hagberg K, Branemark R, Gunterberg B, Rydevik B. Osseointegrated trans-femoral amputation prostheses: prospective results of general and condition-specific quality of life in 18 patients at 2-year follow-up. *Prosthetics and orthotics international*. 2008;32(1):29-41.
25. Al Muderis M, Khemka A, Lord SJ, Van de Meent H, Frolke JP. Safety of Osseointegrated Implants for Transfemoral Amputees: A Two-Center Prospective Cohort Study. *The Journal of bone and joint surgery American volume*. 2016;98(11):900-9.
26. Aschoff HH, Juhnke DL. [Endo-exo prostheses : Osseointegrated percutaneously channeled implants for rehabilitation after limb amputation]. *Der Unfallchirurg*. 2016;119(5):421-7.
27. Branemark R, Berlin O, Hagberg K, Bergh P, Gunterberg B, Rydevik B. A novel osseointegrated percutaneous prosthetic system for the treatment of patients with transfemoral amputation: A prospective study of 51 patients. *The bone & joint journal*. 2014;96-B(1):106-13.
28. Juhnke DL, Aschoff HH. [Endo-exo prostheses following limb-amputation]. *Der Orthopade*. 2015;44(6):419-25.
29. Juhnke DL, Beck JP, Jeyapalina S, Aschoff HH. Fifteen years of experience with Integral-Leg-Prosthesis: Cohort study of artificial limb attachment system. *Journal of rehabilitation research and development*. 2015;52(4):407-20.
30. Muderis MA, Tetsworth K, Khemka A, Wilmot S, Bosley B, Lord SJ, et al. The Osseointegration Group of Australia Accelerated Protocol (OGAAP-1) for two-stage osseointegrated reconstruction of amputated limbs. *The bone & joint journal*. 2016;98-B(7):952-60.
31. Tillander J, Hagberg K, Berlin O, Hagberg L, Branemark R. Osteomyelitis Risk in Patients With Transfemoral Amputations Treated With Osseointegration Prostheses. *Clinical orthopaedics and related research*. 2017;475(12):3100-8.
32. Dougherty PJ. Transtibial amputees from the Vietnam War. Twenty-eight-year follow-up. *The Journal of bone and joint surgery American volume*. 2001;83(3):383-9.
33. Harness N, Pinzur MS. Health related quality of life in patients with dysvascular transtibial amputation. *Clinical orthopaedics and related research*. 2001(383):204-7.
34. Knezevic A, Salamon T, Milankov M, Ninkovic S, Jeremic Knezevic M, Tomasevic Todorovic S. Assessment of Quality of Life in Patients after Lower Limb Amputation. *Med Pregl*. 2015;68(3-4):103-8.

- 1
  - 2
  - 3
  - 4
  - 5
  - 6
  - 7
  - 8
  - 9
  - 10
  - 11
  - 12
  - 13
  - 14
  - 15
  - 16
  - 17
  - 18
  - 19
  - 20
  - 21
  - 22
  - 23
  - 24
  - 25
  - 26
  - 27
  - 28
  - 29
  - 30
  - 31
  - 32
  - 33
  - 34
  - 35
  - 36
  - 37
  - 38
  - 39
  - 40
  - 41
  - 42
  - 43
  - 44
  - 45
  - 46
  - 47
  - 48
  - 49
  - 50
  - 51
  - 52
  - 53
  - 54
  - 55
  - 56
  - 57
  - 58
  - 59
  - 60
35. Dillingham TR, Pezzin LE, MacKenzie EJ. Limb amputation and limb deficiency: epidemiology and recent trends in the United States. *Southern medical journal*. 2002;95(8):875-83.
36. Ziegler-Graham K, MacKenzie EJ, Ephraim PL, Travison TG, Brookmeyer R. Estimating the prevalence of limb loss in the United States: 2005 to 2050. *Archives of physical medicine and rehabilitation*. 2008;89(3):422-9.
37. Walker CR, Ingram RR, Hullin MG, McCreath SW. Lower limb amputation following injury: a survey of long-term functional outcome. *Injury*. 1994;25(6):387-92.
38. Hoaglund FT, Jergesen HE, Wilson L, Lamoreux LW, Roberts R. Evaluation of problems and needs of veteran lower-limb amputees in the San Francisco Bay Area during the period 1977-1980. *J Rehabil R D*. 1983;20(1):57-71.
39. Behr J, Friedly J, Molton I, Morgenroth D, Jensen MP, Smith DG. Pain and pain-related interference in adults with lower-limb amputation: comparison of knee-disarticulation, transtibial, and transfemoral surgical sites. *Journal of rehabilitation research and development*. 2009;46(7):963-72.
40. Dillingham TR, Pezzin LE, MacKenzie EJ, Burgess AR. Use and satisfaction with prosthetic devices among persons with trauma-related amputations: a long-term outcome study. *Am J Phys Med Rehabil*. 2001;80(8):563-71.
41. Pezzin LE, Dillingham TR, Mackenzie EJ, Ephraim P, Rossbach P. Use and satisfaction with prosthetic limb devices and related services. *Archives of physical medicine and rehabilitation*. 2004;85(5):723-9.
42. Butler K, Bowen C, Hughes AM, Torah R, Ayala I, Tudor J, et al. A systematic review of the key factors affecting tissue viability and rehabilitation outcomes of the residual limb in lower extremity traumatic amputees. *Journal of tissue viability*. 2014;23(3):81-93.
43. Atallah R, Li JJ, Lu W, Leijendekkers R, Frolke JP, Al Muderis M. Osseointegrated Transtibial Implants in Patients with Peripheral Vascular Disease: A Multicenter Case Series of 5 Patients with 1-Year Follow-up. *The Journal of bone and joint surgery American volume*. 2017;99(18):1516-23.
44. Leijendekkers RA, van Hinte G, Frolke JP, van de Meent H, Atsma F, Nijhuis-van der Sanden MW, et al. Functional performance and safety of bone-anchored prostheses in persons with a transfemoral or transtibial amputation: a prospective one-year follow-up cohort study. *Clinical rehabilitation*. 2019;33(3):450-64.
45. Lin SJ, Bose NH. Six-minute walk test in persons with transtibial amputation. *Archives of physical medicine and rehabilitation*. 2008;89(12):2354-9.
46. Schoppen T, Boonstra A, Groothoff JW, de Vries J, Goeken LN, Eisma WH. The Timed "up and go" test: reliability and validity in persons with unilateral lower limb amputation. *Archives of physical medicine and rehabilitation*. 1999;80(7):825-8.
47. Al Muderis M, Lu W, Tetsworth K, Bosley B, Li JJ. Single-stage osseointegrated reconstruction and rehabilitation of lower limb amputees: the Osseointegration Group of Australia Accelerated Protocol-2 (OGAAP-2) for a prospective cohort study. *BMJ open*. 2017;7(3):e013508.
48. Ware JE, Jr., Sherbourne CD. The MOS 36-item short-form health survey (SF-36). I. Conceptual framework and item selection. *Medical care*. 1992;30(6):473-83.
49. Muderis MA, Lu W, Glatt V, Tetsworth K. Two-Stage Osseointegrated Reconstruction of Post-traumatic Unilateral Transfemoral Amputees. *Military medicine*. 2018;183(suppl\_1):496-502.
50. Tranberg R, Zugner R, Karrholm J. Improvements in hip- and pelvic motion for patients with osseointegrated trans-femoral prostheses. *Gait & posture*. 2011;33(2):165-8.
51. Hagberg K, Haggstrom E, Uden M, Branemark R. Socket versus bone-anchored trans-femoral prostheses: hip range of motion and sitting comfort. *Prosthetics and orthotics international*. 2005;29(2):153-63.

## Figure Captions

1  
2  
3 Figure 1: The Standard Implant for longer residuums. The parts include: 1, proximal cap  
4 screw. 2, Intramedullary body. 3, internal safety screw. 4, dual cone transcutaneous  
5 abutment adapter. 5, permanent locking propeller screw. 6, proximal connector. 7,  
6 prosthetic connector.  
7  
8

9  
10 Figure 2: Targeted re-innervation of nerves (posterior tibial nerve highlighted) to  
11 surrounding muscular branches  
12

13 Figure 3: Reaming was done for longer residuums to 0.5 mm more than the diameter of  
14 implant expected to be used  
15

16  
17 Figure 4: Broaching done under Image Intensifier guidance upto the desired size of implant  
18 for longer residuums  
19

20 Figure 5: Face reaming done to smoothen the distal margins of the tibial stump  
21

22 Figure 6: Final implantation of the definite intra-medullary component  
23

24 Figure 7: Closure of periosteum around the stump in a 'purse-string' fashion and the flaps  
25 around implant in 'fish-mouth' manner.  
26  
27

28 Figure 8: Attachment of extra-medullary components  
29

30 Figure 9: Final view of the closure of the stump  
31

32 Figure 10: Transtibial Osseointegration Rehabilitation Protocol  
33

34 Figure 11: Transtibial Osseointegration Physiotherapy Protocol  
35

36 Figure 12: After fitting of prosthetic limb in a short residuum tibia  
37  
38

#### 39 40 **AUTHORS' CONTRIBUTIONS**

41  
42 R Haque: Study design; patient care and surgical team; manuscript preparation.

43 S Al-Jawazneh: Data collection; patient care and surgical team

44 J Hoellwarth: Data collection; patient care and surgical team

45 M A Akhtar: Data collection; patient care and surgical team

46 K Doshi: Data collection; patient care and surgical team

47 Y Tan: Data collection, statistical evaluation

48 W. Lu: Data collection; manuscript preparation.

49 C Roberts: Patient care; data collection; manuscript preparation.

50 M Al Muderis: Study design; patient care and surgical procedure; manuscript preparation.  
51  
52

#### 53 54 **Acknowledgement**

55 Bridget Dean: For formulating Transtibial Rehabilitation and Physiotherapy Protocol  
56  
57

#### 58 59 **FUNDING STATEMENT**

60

1  
2  
3 This research received no specific grant from any funding agency in the public, commercial or  
4 not-for-profit sectors.  
5  
6  
7

8  
9 **COMPETING INTERESTS STATEMENT**

10 M. Al Muderis receives royalties for design contributions for the Osseointegrated Prosthetic  
11 Limb (OPL; Permedica s.p.a; Milan, Italy) implant system. All other authors listed in this  
12 study declare no competing interests.  
13  
14  
15  
16  
17  
18  
19  
20  
21  
22  
23  
24  
25  
26  
27  
28  
29  
30  
31  
32  
33  
34  
35  
36  
37  
38  
39  
40  
41  
42  
43  
44  
45  
46  
47  
48  
49  
50  
51  
52  
53  
54  
55  
56  
57  
58  
59  
60

For peer review only



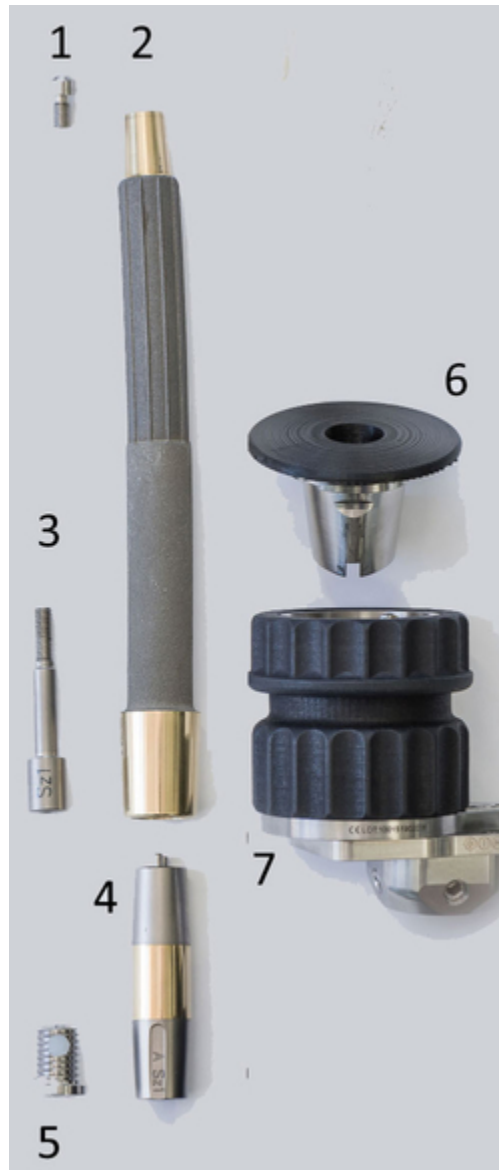

The Standard Implant for longer residuums. The parts include: 1, proximal cap screw. 2, Intramedullary body. 3, internal safety screw. 4, dual cone transcutaneous abutment adapter. 5, permanent locking propeller screw. 6, proximal connector. 7, prosthetic connector.

21x49mm (300 x 300 DPI)

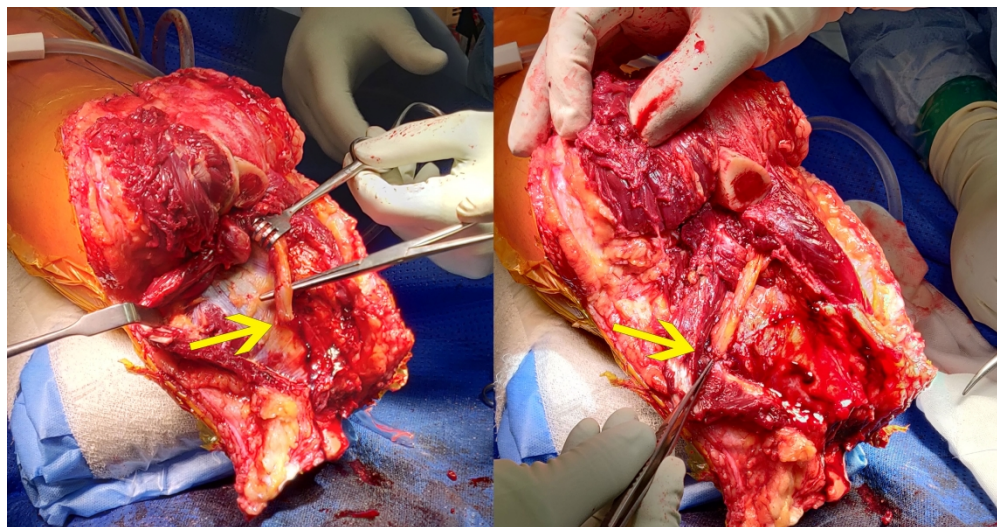

Targeted re-innervation of nerves (posterior tibial nerve highlighted) to surrounding muscular branches

327x171mm (300 x 300 DPI)

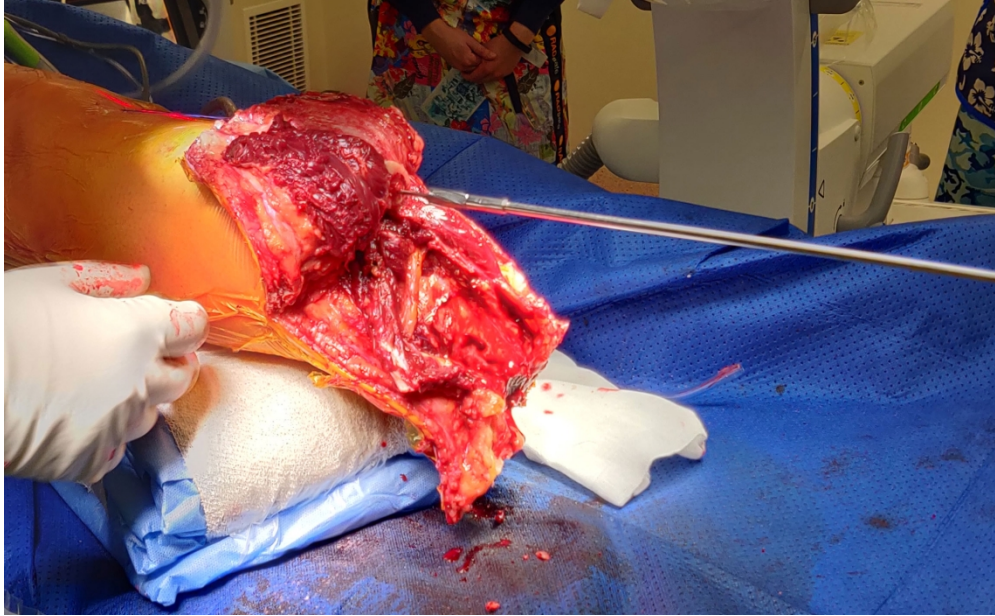

Reaming was done for longer residuums to 0.5 mm more than the diameter of implant expected to be used

195x119mm (300 x 300 DPI)



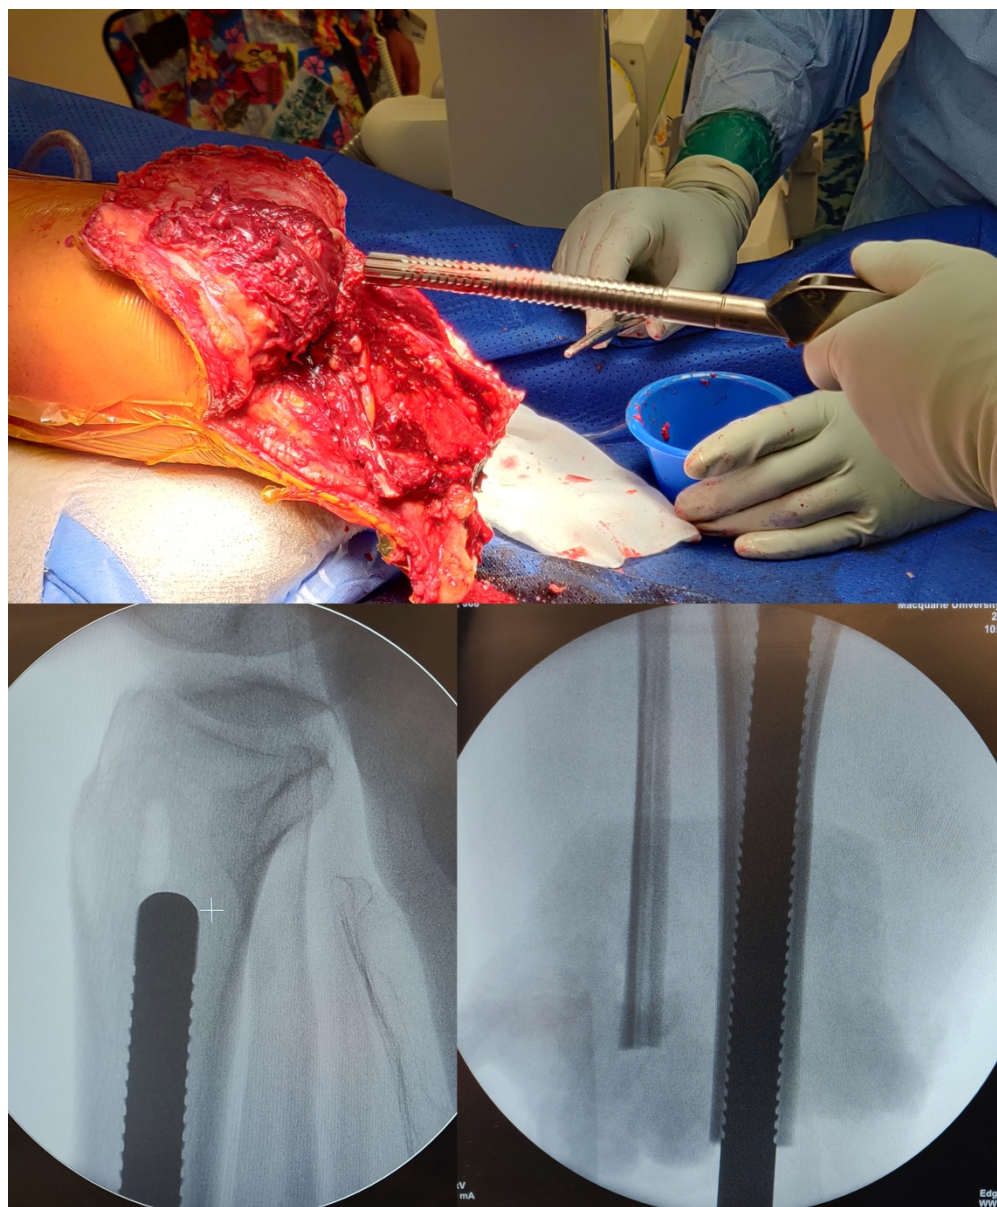

Broaching done under Image Intensifier guidance upto the desired size of implant for longer residuums

325x390mm (300 x 300 DPI)

1  
2  
3  
4  
5  
6  
7  
8  
9  
10  
11  
12  
13  
14  
15  
16  
17  
18  
19  
20  
21  
22  
23  
24  
25  
26  
27  
28  
29  
30  
31  
32  
33  
34  
35  
36  
37  
38  
39  
40  
41  
42  
43  
44  
45  
46  
47  
48  
49  
50  
51  
52  
53  
54  
55  
56  
57  
58  
59  
60

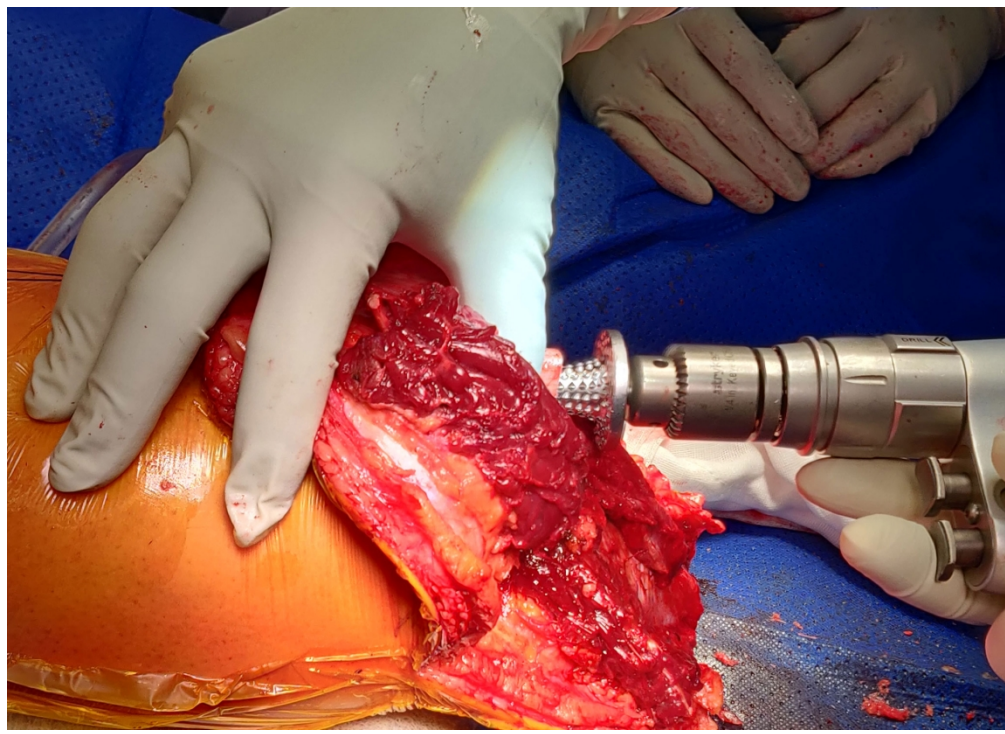

Face reaming done to smoothen the distal margins of the tibial stump  
173x125mm (300 x 300 DPI)

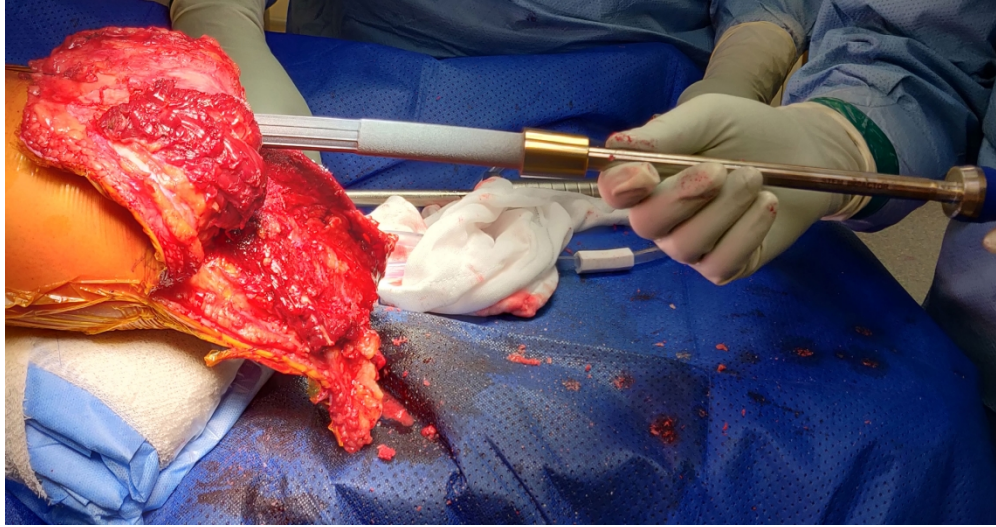

Final implantation of the definite intra-medullary component

252x132mm (300 x 300 DPI)



1  
2  
3  
4  
5  
6  
7  
8  
9  
10  
11  
12  
13  
14  
15  
16  
17  
18  
19  
20  
21  
22  
23  
24  
25  
26  
27  
28  
29  
30  
31  
32  
33  
34  
35  
36  
37  
38  
39  
40  
41  
42  
43  
44  
45  
46  
47  
48  
49  
50  
51  
52  
53  
54  
55  
56  
57  
58  
59  
60

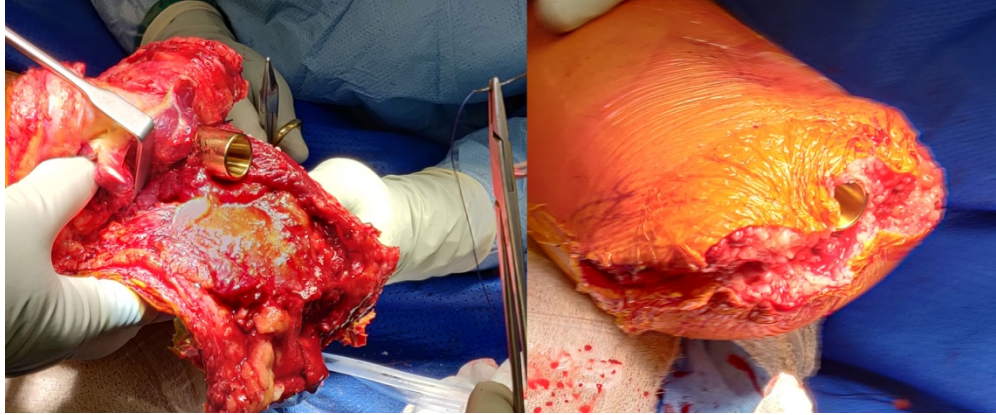

Closure of periosteum around the stump in a 'purse-string' fashion and the flaps around implant in 'fish-mouth' manner

208x85mm (300 x 300 DPI)

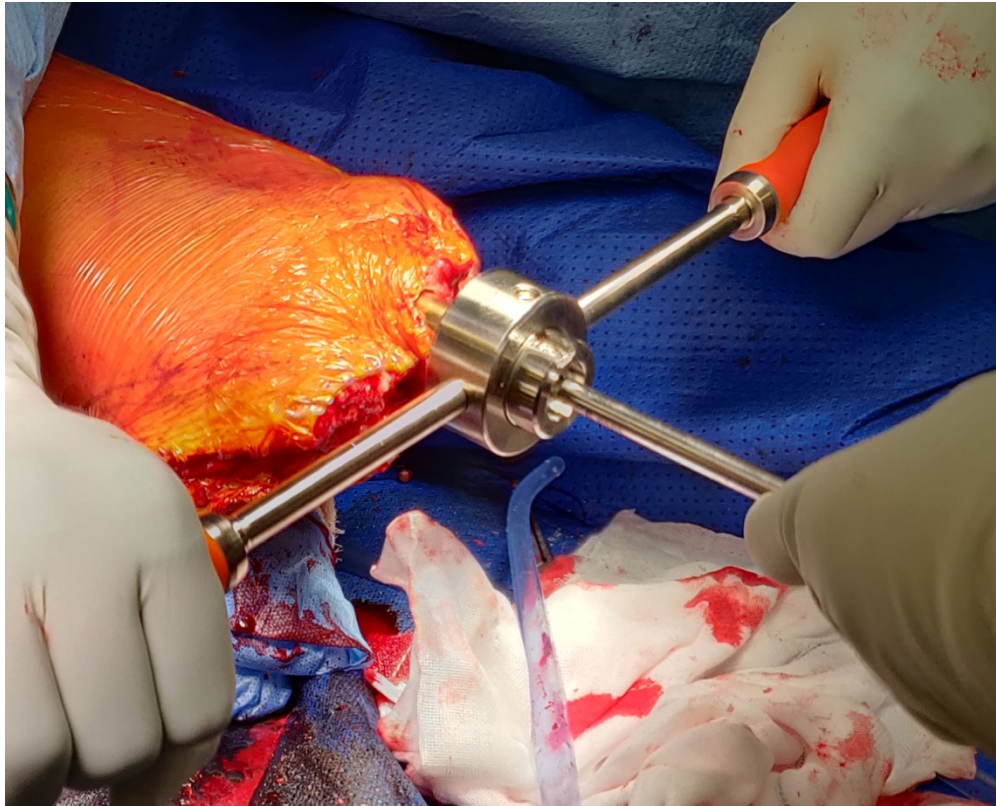

Attachment of extra-medullary components

132x106mm (300 x 300 DPI)

1  
2  
3  
4  
5  
6  
7  
8  
9  
10  
11  
12  
13  
14  
15  
16  
17  
18  
19  
20  
21  
22  
23  
24  
25  
26  
27  
28  
29  
30  
31  
32  
33  
34  
35  
36  
37  
38  
39  
40  
41  
42  
43  
44  
45  
46  
47  
48  
49  
50  
51  
52  
53  
54  
55  
56  
57  
58  
59  
60

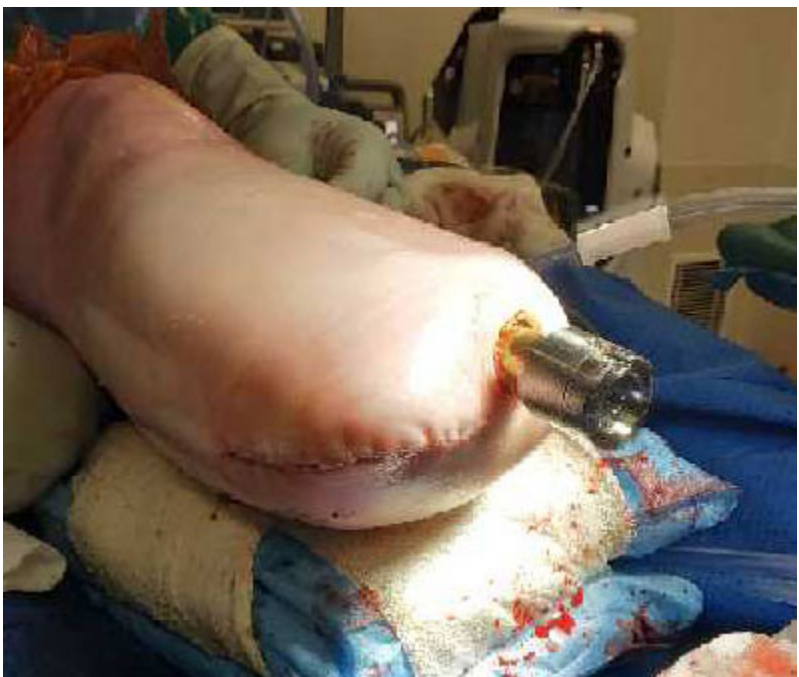

Final view of the closure of the stump  
33x28mm (300 x 300 DPI)

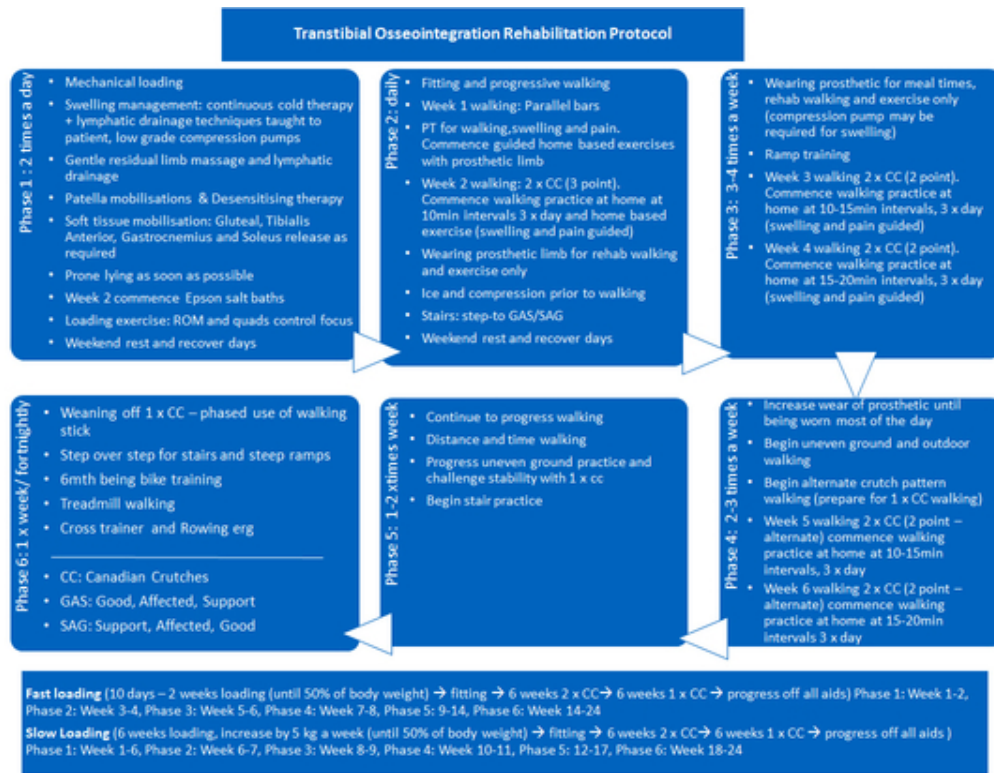

Transtibial Osseointegration Rehabilitation Protocol

45x34mm (300 x 300 DPI)

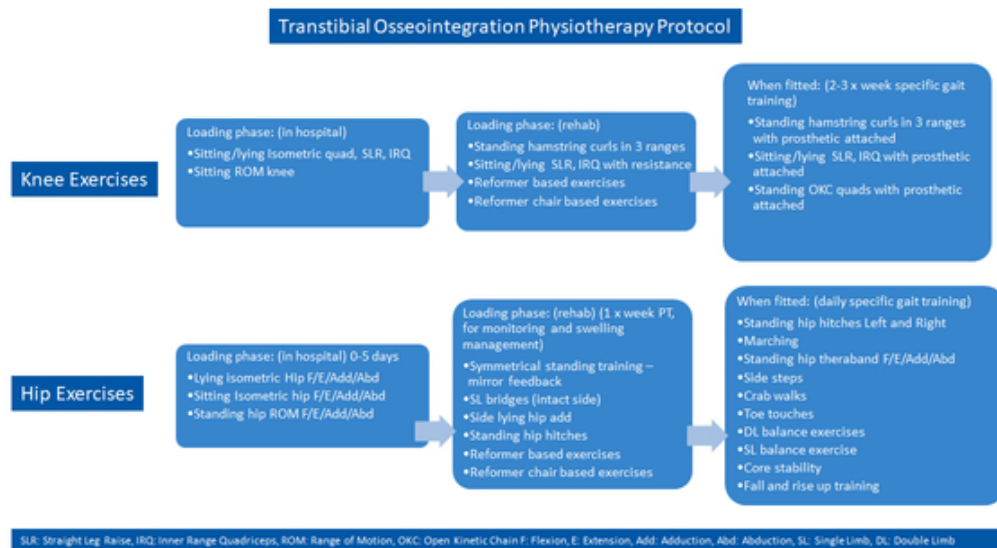

Transtibial Osseointegration Physiotherapy Protocol

47x25mm (300 x 300 DPI)



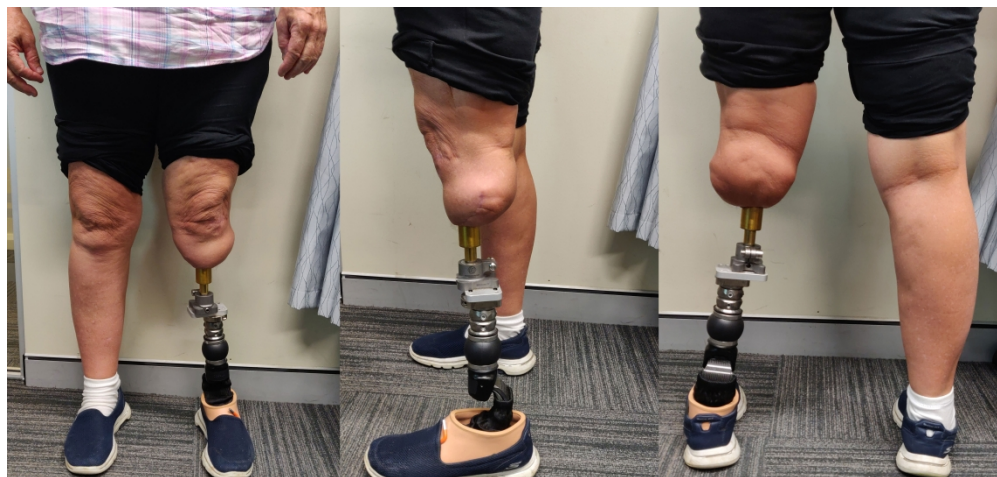

After fitting of prosthetic limb in a short residuum tibia

580x274mm (300 x 300 DPI)



# BMJ Open

## Osseointegrated Reconstruction and Rehabilitation of Transtibial Amputees: the Osseointegration Group of Australia surgical technique and protocol for a prospective cohort study

|                                 |                                                                                                                                                                                                                                                                                                                                                                                                                                                                                                                                                                                                                                                                                                                                                                                                                                                                                   |
|---------------------------------|-----------------------------------------------------------------------------------------------------------------------------------------------------------------------------------------------------------------------------------------------------------------------------------------------------------------------------------------------------------------------------------------------------------------------------------------------------------------------------------------------------------------------------------------------------------------------------------------------------------------------------------------------------------------------------------------------------------------------------------------------------------------------------------------------------------------------------------------------------------------------------------|
| Journal:                        | <i>BMJ Open</i>                                                                                                                                                                                                                                                                                                                                                                                                                                                                                                                                                                                                                                                                                                                                                                                                                                                                   |
| Manuscript ID                   | bmjopen-2020-038346.R2                                                                                                                                                                                                                                                                                                                                                                                                                                                                                                                                                                                                                                                                                                                                                                                                                                                            |
| Article Type:                   | Protocol                                                                                                                                                                                                                                                                                                                                                                                                                                                                                                                                                                                                                                                                                                                                                                                                                                                                          |
| Date Submitted by the Author:   | 25-Aug-2020                                                                                                                                                                                                                                                                                                                                                                                                                                                                                                                                                                                                                                                                                                                                                                                                                                                                       |
| Complete List of Authors:       | Haque, Russel; Macquarie University Hospital, Department of Orthopaedic Surgery; Macquarie University Hospital, The Limb Reconstruction Discipline<br>Al-Jawazneh, Shakib; Macquarie University Hospital, Department of Orthopaedic Surgery; The University of Sydney, Faculty of Medicine and Health<br>Hoellwarth, Jason; Macquarie University Hospital, Department of Orthopaedic Surgery<br>Akhtar, Muhammad Adeel; NHS Fife, Depart of Orthopaedic Surgery<br>Doshi, Karan; Macquarie University Hospital, Department of Orthopaedic Surgery<br>Tan, Yao Chang; Macquarie University<br>Lu, William; Macquarie University,<br>Roberts, Claudia; Macquarie University Hospital, The Limb Reconstruction Discipline<br>Al Muderis, Munjed; Macquarie University Hospital, Department of Orthopaedic Surgery; Macquarie University Hospital, The Limb Reconstruction Discipline |
| <b>Primary Subject Heading</b>: | Surgery                                                                                                                                                                                                                                                                                                                                                                                                                                                                                                                                                                                                                                                                                                                                                                                                                                                                           |
| Secondary Subject Heading:      | Surgery                                                                                                                                                                                                                                                                                                                                                                                                                                                                                                                                                                                                                                                                                                                                                                                                                                                                           |
| Keywords:                       | ORTHOPAEDIC & TRAUMA SURGERY, REHABILITATION MEDICINE, Limb reconstruction < ORTHOPAEDIC & TRAUMA SURGERY, PLASTIC & RECONSTRUCTIVE SURGERY                                                                                                                                                                                                                                                                                                                                                                                                                                                                                                                                                                                                                                                                                                                                       |
|                                 |                                                                                                                                                                                                                                                                                                                                                                                                                                                                                                                                                                                                                                                                                                                                                                                                                                                                                   |

SCHOLARONE™  
Manuscripts



I, the Submitting Author has the right to grant and does grant on behalf of all authors of the Work (as defined in the below author licence), an exclusive licence and/or a non-exclusive licence for contributions from authors who are: i) UK Crown employees; ii) where BMJ has agreed a CC-BY licence shall apply, and/or iii) in accordance with the terms applicable for US Federal Government officers or employees acting as part of their official duties; on a worldwide, perpetual, irrevocable, royalty-free basis to BMJ Publishing Group Ltd ("BMJ") its licensees and where the relevant Journal is co-owned by BMJ to the co-owners of the Journal, to publish the Work in this journal and any other BMJ products and to exploit all rights, as set out in our [licence](#).

The Submitting Author accepts and understands that any supply made under these terms is made by BMJ to the Submitting Author unless you are acting as an employee on behalf of your employer or a postgraduate student of an affiliated institution which is paying any applicable article publishing charge ("APC") for Open Access articles. Where the Submitting Author wishes to make the Work available on an Open Access basis (and intends to pay the relevant APC), the terms of reuse of such Open Access shall be governed by a Creative Commons licence – details of these licences and which [Creative Commons](#) licence will apply to this Work are set out in our licence referred to above.

Other than as permitted in any relevant BMJ Author's Self Archiving Policies, I confirm this Work has not been accepted for publication elsewhere, is not being considered for publication elsewhere and does not duplicate material already published. I confirm all authors consent to publication of this Work and authorise the granting of this licence.

1  
2  
3  
4  
5  
6  
7  
8  
9  
10  
11  
12

## Osseointegrated Reconstruction and Rehabilitation of Transtibial Amputees: the Osseointegration Group of Australia surgical technique and protocol for a prospective cohort study

Russel Haque<sup>1,2,5</sup>, Shakib Al-Jawazneh<sup>1,3,5</sup>, Jason Shih Hoellwarth<sup>1</sup>, Muhammad Adeel Akhtar<sup>1,4</sup>, Karan Doshi<sup>1,2</sup>, Yao Chang Tan<sup>5</sup>, William Lu<sup>5</sup>, Claudia Roberts<sup>2</sup>, Munjed Al Muderis<sup>1,2,5</sup>

- 13 1. Department of Orthopaedic Surgery, Macquarie University Hospital, Sydney, New South Wales, 2109, Australia
- 14 2. The Limb Reconstruction Discipline, Macquarie University Hospital, Sydney, New South Wales, Australia
- 15 3. Faculty of Medicine and Health, University of Sydney, New South Wales, Australia
- 16 4. NHS Fife, Victoria Hospital, Kirkcaldy, Scotland, United Kingdom.
- 17 5. Osseointegration Group of Australia, 2 Technology Place, Macquarie University, NSW 2220 Australia

23  
24  
25  
26  
27

### \*Corresponding author:

28 William Lu

29  
30 Osseointegration Group of Australia, 2 Technology Place, Macquarie University, NSW 2220  
31 Australia

32  
33  
34 Phone: +61 0468805858

35  
36 Email: research@osseointegrationaustralia.com.au

37  
38  
39  
40  
41  
42  
43  
44  
45  
46  
47  
48  
49  
50  
51  
52  
53  
54  
55  
56  
57  
58  
59  
60

Keywords: Osseointegration; Lower limb amputees; Transtibial

## Abstract

### Introduction

Lower extremity amputation uniformly impairs a person's vocational, social, and recreational capacity. Rehabilitation in Traditional Socket Prostheses (TSP) is associated with a spectrum of complications involving the socket-residuum interface which lead to reduced prosthetic use and quality of life. Osseointegration has recently emerged as a novel concept to overcome these complications by eliminating this interface and anchoring the prosthesis directly to bone. Though the complications of TSPs affect both transfemoral and transtibial amputees, Osseointegration has been predominantly performed in transfemoral ones assuming a greater benefit/risk ratio. However, as the safety of the procedure has been established, we intend to extend the concept to transtibial amputees and document the outcomes.

### Methods and analysis

This is protocol for a prospective cohort study, with patient enrollment started in 2014 and expected to be completed by 2022. The inclusion criteria are age over 18 years, unilateral, bilateral and mixed transtibial amputation and experiencing socket-related problems. All patients receive Osseointegrated implants, the type of which depend on the length of the residuum and quality of bone, which are press-fitted into the residual bone. Objective functional outcomes comprising 6-minute walk test, Timed Up-and-Go test and K level, subjective patient-reported-quality-of-life outcomes (SF-36, daily prosthetic wear hours, prosthetic wear satisfaction) and adverse events are recorded preoperatively and at post-operative follow-up intervals of 3, 6, 12 months and yearly, and compared to the pre-operative values using appropriate statistical tests. Multivariable multilevel logistic regression will be performed with a focus to identify factors associated with outcomes and adverse events, specifically infection, periprosthetic fracture, implant fracture, and aseptic loosening.

### Ethics and dissemination

The Ethics approval for the study has been received from the University of Notre Dame, Sydney, Australia (014153S). The outcomes of this study will be disseminated by publications in peer-reviewed academic journals and scientific presentations at relevant orthopaedic conferences.

### Strengths and Limitations of the study

- This study will be the first major one to focus on transtibial osseointegration only and will have the largest cohort reported in literature so far.

- The findings of the study would assess whether osseointegration in transtibial amputees is feasible in terms of risks and benefits and also make an important contribution to the otherwise limited literature regarding outcomes of osseointegration in lower extremity amputations.
- The data may also help provide a foundation for estimating societal impact of transtibial osseointegration, particularly the true economic impact as compared to traditional socket prostheses by indirect means.
- It does not have a control group and therefore comparison of outcomes of transtibial osseointegration directly with traditional socket prostheses used by transtibial amputees is not possible.
- The study has a follow-up period of minimum 2 years, which does not allow the examination of longer term outcomes and risk of adverse events as well as long term survivorship

## Introduction

Amputation of a lower extremity not only causes changes in the anatomy and function of the limb but also almost inevitably results in major impairments of the person's vocational, social and recreational abilities and overall quality of life.<sup>1</sup> The focus of management of extremity amputations has evolved over time due to advancement of medical technology from prevention of mortality to overcoming these impairments and improving quality of life.<sup>2</sup> For centuries, the conventional way of rehabilitating such individuals has been via traditional socket mounted prostheses (TSP),<sup>3</sup> and despite significant technological innovations to both socket materials and design, there has been very little change to the overall prosthetic-residuum interface from a moulded compression cone to modern suction-based socket suspension.<sup>4</sup>

The use of TSP is associated with a spectrum of complications arising mainly out of the socket-residuum-interface that causes reduction in prosthesis use, ability to mobilize and quality of life.<sup>1, 5-7</sup> These include skin problems such as infections, and skin breakdown due to chronic irritation and thermal injury,<sup>8-11</sup> mechanical problems such as suboptimal fit, pain and pistoning<sup>12</sup> and problems with proprioception that leads to loss of balance and falling.<sup>13</sup> Gait with a TSP has been found to be asymmetrical correlating with a weakness in the hip abductor muscles, which can explain the back pain and pain in other regions experienced by such users including ipsilateral and contralateral limb, buttocks, neck and shoulder.<sup>14</sup> Socket prostheses users account for their poor quality of life mostly to physical disability, pain and decreased energy levels.<sup>5, 15</sup>

In order to overcome these complications, a significantly different concept has emerged over the past two decades, which circumvents the socket-residuum-interface completely by anchoring the prosthesis directly to the bone, popularly known as Osseointegration.<sup>16</sup> It involves insertion of porous metal implant in the medullary cavity of the bone in a screw or press-fit technique, over which compact cortical bone grows without any intervening soft



1  
2  
3 tissue in a short course of time, integrating the implant structurally and functionally to the  
4 bone.<sup>17</sup>  
5

6  
7 This integration of nonvital component into living bone was first discovered serendipitously  
8 in 1950s in rabbit models<sup>4</sup> and has been well established in the field of dentistry for the  
9 treatment of edentulous jaws for many years with a 10-year survival of dental implants in  
10 mandibular bone of 95%.<sup>18-21</sup> Since its first introduction in 1990s in individuals with  
11 amputations, osseointegration has been predominantly used for the treatment of  
12 individuals with transfemoral amputation demonstrating multiple potential advantages such  
13 as improved walking ability, daily prosthetic use, reduced energy consumption, sitting  
14 comfort and osseoperception.<sup>7, 22, 23</sup> This results in improved mobility and quality of life for  
15 individuals with amputations.<sup>1, 7, 22, 24</sup>  
16  
17  
18  
19

20 Over the last few years multiple studies have been published investigating the safety of this  
21 procedure, especially in individuals with transfemoral amputations, as incorporating a metal  
22 implant into the bone, whilst having an open connection with the outside environment can  
23 give rise to substantial concerns regarding the risk of ascending infection and concomitant  
24 implant loosening or sepsis.<sup>25-31</sup> Multiple studies reported that despite frequent colonization  
25 around the skin-implant interface, the implant system caused few infections leading to  
26 disability or implant removal (average 4%).<sup>25-31</sup> Most encountered complications were soft  
27 tissue infections or redundancy of soft tissue possibly influenced by learning curve and  
28 iteration of surgical technique and implant design.<sup>25, 29</sup>  
29  
30  
31  
32

33 Osseointegration has been predominantly used in transfemoral amputees (TFA) as  
34 compared to transtibial amputees (TTA), due to apparently greater benefit-risk ratio with  
35 the TFA being perceived to have more socket related problems and poorer mobility as  
36 compared to TTAs and the extent of risks or complications of the new procedure largely  
37 unknown.<sup>15, 32-34</sup> Due to the same reasons, commercial availability of approved standard  
38 implants for TFA only promoted its use. Furthermore, it is much easier to press-fit or insert a  
39 screw fixation implant in to a cylindrical cortical bone such as a femur as opposed to the  
40 reverse pyramid shaped cancellous bone of the proximal tibia<sup>26</sup>. It is very challenging to  
41 press fit an implant into cancellous bone and achieve immediate stability. The same  
42 principles apply to a screw fixation device.  
43  
44  
45  
46  
47

48 With the establishment of safety of this procedure in literature, there is enough justification  
49 now for its use in individuals with TTA. Firstly, the prevalence of transtibial amputations is  
50 much higher than transfemoral amputations.<sup>35, 36</sup> Of these individuals using socket  
51 prostheses, 40% experience at least one skin problem, with the percentage substantially  
52 higher in individuals with TTA (TTA: 45.8%, TFA: 20%; OR: 4.1). Secondly, there is increased  
53 percentage of stump pain reported in patients with TTA.<sup>8, 37</sup> Thirdly, suboptimal socket fit  
54 occurs in both individuals with TTA and with TFA (TTA: 59%, TFA: 78%)<sup>38</sup> and dissatisfaction  
55 with socket prostheses does not differ when comparing for level of amputation, with only  
56 43% being satisfied with the comfort of their prosthesis.<sup>39-41</sup> These problems are inherently  
57  
58  
59  
60

1  
2  
3 linked to intolerance of the prosthesis<sup>12</sup> and impact the ability of TTA to become  
4 independently mobile.<sup>42</sup>  
5

6  
7 Until recently, there is very little data assessing the protocol, techniques and results of  
8 Osseointegration in individuals with TTA. Only few papers with very small case series have  
9 been published with variable results.<sup>26, 28, 43, 44</sup>  
10

## 11 **Study objectives**

12  
13  
14 The overall objective of this study is to assess the safety and efficacy of transtibial  
15 osseointegration procedure with at least 2 year follow-up and to compare the benefits and  
16 risks from pre-operative status and with the previously reported outcomes for transfemoral  
17 osseointegration. Specifically, this would involve:  
18

19 1. Assessing the objective functional outcomes with the 6 Minute Walk Test (6MWT)  
20 <sup>45</sup>, Timed Up and Go (TUG)<sup>46</sup> and K-levels<sup>47</sup>, compared with preoperative data and with  
21 outcomes of TFA.  
22

23 2. Assessing the subjective patient-reported quality-of-life outcomes with the Short  
24 Form Health Survey 36 (SF-36)<sup>48</sup>, Stump Pain, Daily prosthetic wear hours and Prosthetic  
25 wear satisfaction compared with preoperative data and with outcomes of TFA.  
26

27 3. Examining the prevalence of adverse events, including infection, revision surgery,  
28 fractures, aseptic loosening and implant failures, and compare with the adverse events after  
29 TFA.  
30

31 One of the primary objectives of this study is to identify the individual patient characteristics  
32 or factors that have a positive or negative influence in the outcomes mentioned above. This  
33 analysis in a regression model would help to identify the patients based on their  
34 characteristics who would be most or least benefitted with this novel procedure and who  
35 would be at a higher or lower risk of failure.  
36  
37

38  
39 The other objective is to identify the rate of additional surgical interventions as well as to  
40 identify factors associated with further surgery, specifically for infection, periprosthetic  
41 fracture, implant fracture, and aseptic loosening.  
42  
43

## 44 **Methods and analysis**

45  
46  
47 This is a prospective cohort study which is designed to assess the safety and efficacy of  
48 Transtibial Osseointegration procedure with a minimum of 2 years (range 2-8 years) follow-  
49 up.  
50

51  
52 Preliminary data and clinical experience has been obtained from an initial pilot study  
53 comprising 10 patients owing to absence of prior literature. Software G\* Power was used to  
54 calculate an a priori sample size. Considering SF-36 physical component score as primary  
55 outcome measure, the pre-operative and 2 year post-operative scores were recorded.  
56 Comparing the means (37.62 and 44.83) and SDs (11.8 and 19.5) of these 2 groups  
57 respectively using Wilcoxon test, the effect size was calculated to be 0.36 and sample size  
58 was calculated to be 87 assuming  $\alpha$  error to be 0.05 and in order to achieve a Power of 95  
59  
60

1  
2  
3 % . Considering a drop-out rate of 20%, a final sample size of 109 was decided upon. None of  
4 the patients of the pilot study have been included in this study due to absence of standard  
5 protocol.  
6  
7

8 The first patient enrolled in the study was in April 2014. Enrolment is ongoing at the time of  
9 publication of this paper, with 68 patients already enrolled and is expected to be completed  
10 by April 2022. The number of patients treated each year has shown a steep rising trend with  
11 about 26 patients enrolled in the study last year.  
12  
13

## 14 Patient selection

### 15 Eligibility criteria

16  
17 The Ethics approval for the study has been received from the University of Notre Dame,  
18 Sydney, Australia (014153S). All participants gave their informed consent. Inclusion and  
19 Exclusion criteria along-with rationale are listed in Table 1.  
20  
21  
22  
23

24 **Table 1: Inclusion and Exclusion Criteria with Reason**

| 25 Inclusion Criteria                                                                                                                                                                                                                                       |                                                                                                                                                                                                                                                       |
|-------------------------------------------------------------------------------------------------------------------------------------------------------------------------------------------------------------------------------------------------------------|-------------------------------------------------------------------------------------------------------------------------------------------------------------------------------------------------------------------------------------------------------|
| 26 Criteria                                                                                                                                                                                                                                                 | 27 Reason                                                                                                                                                                                                                                             |
| 28 Age at least 18 years                                                                                                                                                                                                                                    | 29 Legal self-consent                                                                                                                                                                                                                                 |
| 30 Current unilateral, bilateral or mixed<br>31 transtibial amputees with significant<br>32 dissatisfaction regarding prosthesis fit or<br>33 pain, mobility, or skin breakdown                                                                             | 34 Objective, identifiable deficit in current<br>35 patient lifestyle                                                                                                                                                                                 |
| 36 Patients with a full lower limb but with<br>37 pain, deformity, or weakness distal to the<br>38 mid-tibia who desired amputation for pain<br>39 management or improved mobility<br>40 following removal of the deformed or weak<br>41 joint and muscles. | 42 Objective, identifiable quality of life<br>43 impairment that can be objectively<br>44 improved by amputation, and patients<br>45 likely would experience better<br>46 rehabilitation with osseointegration than<br>47 standard socket prosthesis. |
| 48 Patients with amputations who wished to<br>49 try osseointegration instead of a traditional<br>50 socket prosthesis.                                                                                                                                     | 51 Honoring patient choice after an ethical,<br>52 shared and sound decision making process                                                                                                                                                           |
| 53 Patient with sufficient resources and<br>54 willingness to pursue surgery, post-<br>55 operative rehabilitation, and prosthesis<br>56 procurement.                                                                                                       | 57 Rehabilitation and prosthesis fitting are all<br>58 required for appropriate, safe improvement<br>59 following osseointegration surgery.                                                                                                           |
| 60                                                                                                                                                                                                                                                          |                                                                                                                                                                                                                                                       |
| 61 Exclusion Criteria                                                                                                                                                                                                                                       |                                                                                                                                                                                                                                                       |
| 62 Criteria                                                                                                                                                                                                                                                 | 63 Reason                                                                                                                                                                                                                                             |
| 64 Active infection any location                                                                                                                                                                                                                            | 65 Unacceptably high and modifiable infection<br>66 risk                                                                                                                                                                                              |
| 67 Active malignancy or ongoing/planned<br>68 treatment for malignancy at any location                                                                                                                                                                      | 69 High risk for infection, impaired biology for<br>70 osseointegration, impaired patient stamina<br>71 for rehabilitation                                                                                                                            |

|                                                                                                                               |                                                                                                                                                                               |
|-------------------------------------------------------------------------------------------------------------------------------|-------------------------------------------------------------------------------------------------------------------------------------------------------------------------------|
| Skeletal immaturity                                                                                                           | Unknown risk given the current knowledge of osseointegration outcomes and biological impact                                                                                   |
| Patients with psychiatric concern identified during pre-operative consultation with psychiatrist                              | Minimize risk of performing surgery for a patient whose expressed deficits are psychiatric-based instead of musculoskeletal-based, and thus unlikely to improve with surgery. |
| Patients considered too medically ill, too muscularly weak, or insufficiently dedicated to improve following osseointegration | Avoid harming patients with surgery that may be either unlikely to benefit them or possibly pose a health risk.                                                               |
| Insufficient remaining tibia length to accept an implant                                                                      | Avoid performing surgery for a patient who would be unlikely to achieve successful bone ingrowth to the implant                                                               |
| Uncontrolled diabetes mellitus                                                                                                | Avoid unnecessary, modifiable risk for infection                                                                                                                              |
| Females currently or intending to become pregnant within the year following surgery                                           | Unnecessary risk to fetus due to potential for falls or other unforeseen adverse events                                                                                       |

## Patient recruitment

### Setting and Patient Screening

Our surgical practice is located in a private university hospital in a major urban city with full, modern medical capabilities. Local patient referral can occur via the usual routes for our practice: from the general practitioner or by self-referral. Non-local patients within the country and international patients can also contact our office, as is typical already, and are encouraged to provide information for pre-evaluation. All patients being referred for, or requesting, osseointegration are required to complete an online Patient Screening Form. Those patients fitting our Inclusion and Exclusion criteria are invited for in-person consultation. Patients who sustain acute traumatic injuries for which amputation is recommended can request osseointegration as primary management, either acutely or following the resolution of their acute injury.

### Patient Enrolment

All patients who complete the online Patient Screening Form and fit the inclusion/exclusion criteria are evaluated in the multidisciplinary Limb Reconstruction Clinic. The typical medical team includes at least three orthopaedic surgeons with extensive limb reconstruction experience. Also in attendance are a prosthetist and physiotherapist, to ensure the patient's complaints are not suitably improved by prosthesis adjustment or therapy. Patients are also evaluated by our psychiatrist to ensure absence of psychiatric conditions that can affect post-operative rehabilitation. For patients who have neuropathic pain or a history of narcotic or other pain-related medication use or abuse, a pain medicine consultation is required. All patients are counselled extensively by the team which includes a dynamic

1  
2  
3 assessment and discussion of the benefits (mobility, quality of life, etc) as well as the risks  
4 (infection, fracture, further surgery including full removal or further amputation, etc) of  
5 osseointegration. The patients are fully explained about the relative novelty of this surgery  
6 and that the immediate and long term risk/benefit profile is still not very well defined so  
7 that an ethical, sound and shared decision making process is achieved. All patients who  
8 elect for osseointegration are informed their care is provided at the best clinical judgment,  
9 but that they will be enrolled as part of a prospective and longitudinal study as described.  
10 There is no arbitrary treatment based on assignment into a treatment category. Implant  
11 selection and exact surgical technique is expressly tailored to each patient.  
12  
13  
14

15 The time between patient enrolment and surgery will vary. Patients who have a traumatic  
16 injury and have inpatient consultation may have osseointegration the next day. Healthy  
17 patients with streamlined financial coverage and who are able to attain psychiatric  
18 evaluation quickly could have surgery within a week of consultation. For patients who do  
19 not have appropriate insurance coverage, there is a waiting period for the most appropriate  
20 coverage level of one year; and during that waiting time would be recommended to  
21 participate in pre-habilitation exercises and have other perioperative optimization  
22 performed.  
23  
24  
25

#### 26 Potential Selection Bias

27 One of the limitations of this study is possibility of selection bias to exclude low income  
28 patients. Osseointegration is an expensive surgery and thus is not covered by the standard  
29 government insurance for our country. It is covered by more premium insurance plans. Thus  
30 we counsel patients to enrol in these top level insurance plans so that not only will the  
31 surgery itself be provided but any additional surgery for an adverse event will be covered, so  
32 long as they maintain their coverage. Due to this limitation the results of the study may not  
33 be generalizable to all countries and all populations.  
34  
35  
36  
37  
38

#### 39 Study intervention

##### 40 Preoperative management

41 All the patients are assessed with AP and lateral plain radiographs of the residuum to assess  
42 the bone quality and presence of any anomaly. Long leg standing radiographs are performed  
43 to assess the mechanical alignment of the lower limbs and to rule out pathologies in the  
44 contralateral limb. DEXA scans of the proximal femora and the spine to assess the bone  
45 mineral density which would help determine the speed of post-operative rehabilitation.  
46 Furthermore, CT scans of the residual bone are performed to plan for the type of implant  
47 and required size..  
48  
49  
50  
51  
52  
53

##### 54 Osseointegration Implant

55 The Transtibial Osseointegration implant used by us for, was designed by senior author  
56 (MAM) into mainly two types. For longer residuums with sufficient cortical bone, a standard  
57 titanium implant which was machine manufactured of 160mm length with plasma spraying  
58 on the surface was used (Figure 1). Alternatively, for short residuums with metaphyseal  
59  
60



1  
2  
3 bone a custom-made short stem titanium implant with coarser surface structure was either  
4 machine manufactured or 3D printed. The surface of the implant is composed of a  
5 macroporous mesh-like structure allowing for bone ingrowth. Some implants contain  
6 longitudinal flanges for additional rotational stability. All implants are connected to a dual  
7 cone adapter with Morse-taper ends connecting the implant with the external prosthesis.  
8 The surface of the dual cone adapter is highly polished and coated with titanium-niobium  
9 oxide, an alloy known to have bacterial repellent properties<sup>4</sup>, which also facilitates the  
10 excursion of the soft tissues and skin over it avoiding adhesions. A safety mechanism is built  
11 into the dual cone, with a safety pin that breaks to reduce the chance of periprosthetic  
12 fractures or implant breakage.  
13  
14  
15

### 16 **Surgical Technique**

17  
18 All patients receive an osseointegrated implant in a single-stage surgery. At the level of the  
19 distal stump, a horizontal elliptical incision is made, the amount of soft tissue and muscle  
20 tissue is minimalized and all nerves are sharply severed and vessels are ligated or cauterized  
21 until hemostasis is achieved. The saphenous, tibial and common peroneal nerves are re-  
22 innervated to surrounding muscle branches if symptoms of nerve pain or excessive phantom  
23 pain existed pre-operatively (Figure 2). Alternatively, the re-innervation of tibial and  
24 common peroneal nerves can be performed via a separate lateral distal thigh incision and  
25 posterior dissection.  
26  
27  
28  
29

30  
31 Care is taken to preserve the periosteum at all times. If the distal end of the tibia needs to  
32 be re-cut, the periosteum is elevated and re-sutured to the end of the bone after using an  
33 oscillating saw for the distal tibia osteotomy. The fibula is usually cut 2-3 cm shorter than  
34 the tibia using the saw.  
35  
36

37  
38 The intramedullary canal is prepared depending on the length of the residuum. If the  
39 amputation is at the diaphysial level with good cortical bone distally then reaming up to 0.5  
40 mm larger than the definite implant anticipated to be used after cortical chatter is heard  
41 (Figure 3) followed by sequential broaching up to the size of the desired implant (Figure 4).  
42 If the tibial stump is at the metaphyseal level with poor quality bone then no reaming is  
43 done and only impaction broaching is performed usually stopping at 2 mm smaller than the  
44 definite size of the implant. Both reaming and broaching is performed under image  
45 intensifier guidance to ensure accurate positioning in the centre of the tibia on the AP and  
46 lateral planes. Finally, the distal edge of the tibia is smoothed with use of a face-reamer  
47 (Figure 5).  
48  
49  
50

51  
52 Final implantation of the osseointegration intramedullary component is done using press-fit  
53 technique up to the subchondral bone of the proximal tibia (Figure 6). To stabilize the  
54 implant in shorter residual stumps, multiple locking screws were initially used, before it was  
55 abandoned due to increased risk of loosening and no added benefits.  
56  
57

58  
59 Closure is initiated by suturing the fascia to the periosteum all around at the distal end of  
60 the tibial stump in a 'purse-string' fashion. This has not been described previously for tibias

and is unique to our group. The anterior and posterior soft tissue sleeves are refashioned to remove subcutaneous fat. A flap is created-preferably anterior, to cover the end of the stump and to begin closure in layers. A sharp corer is used to make a stoma in the flap to communicate to the exact diameter of the implant, before progressing to close the rest of the wound in layers. Alternatively, the anterior and posterior flaps are closed around the implant in a 'fish-mouth' fashion (Figure 7). After this step, the dual cone component of the osseointegration device is inserted and secured with an internal locking screw, followed by fixing the taper sleeve and bushing to the dual cone using an external screw, all the time securing the implant to prevent rotation using a special device (Figure 8 and 9).

### Postoperative Rehabilitation

The rehabilitation for transtibial osseointegration is carried out in phases and described in details in Figure 10 and 11. The adherence to the rehabilitation protocol is recorded in the database by the physiotherapist. Following the fitting of a prosthetic limb (Figure 12), patients are encouraged to weight-bear daily on their prosthesis using two crutches for six weeks and then one crutch on the opposite side for a further six weeks and then unaided thereafter

### Outcome

#### Data sampling

Data sampling is done at baseline pre-operatively and post-operatively at 3, 6 and 12 months and yearly follow-ups thereafter. It is done by dedicated research assistants who are unaware of the details of patients' demographic characteristics, surgical and implant details and previous scores to reduce the risk of any bias. Clinical information from surgery and follow-ups are added to the database by the operating or reviewing surgeon. Data that is sampled including the time points of measurement are tabulated in Table 2.

**Table 2: Data Sampling Table showing the parameters sampled and time points of measurement**

| Parameter Sampled  | Details | Time point of measurement |
|--------------------|---------|---------------------------|
| Name               |         | T0                        |
| Date of Birth      |         | T0                        |
| Address            |         | T0                        |
| Phone number/Email |         | T0                        |
| Gender             |         | T0                        |
| Height             |         | T0                        |
| Weight             |         | T0                        |
| Military           | Yes/No  | T0                        |
| Athlete            | Yes/No  | T0                        |
| Race               |         | T0                        |
| Education Level    |         | T0                        |

|    |                                       |                                                                                                                                             |                |
|----|---------------------------------------|---------------------------------------------------------------------------------------------------------------------------------------------|----------------|
| 1  | Employment status before OI surgery   |                                                                                                                                             | T0             |
| 2  | Type of occupation before OI surgery  |                                                                                                                                             | T0             |
| 3  | Age at 1 <sup>st</sup> Surgery        |                                                                                                                                             | T0             |
| 4  | Date of 1 <sup>st</sup> Surgery       |                                                                                                                                             | T0             |
| 5  | Any Further surgeries                 | Yes/No. Dates of further surgeries if Yes                                                                                                   | When it occurs |
| 6  | Side                                  |                                                                                                                                             | T0             |
| 7  | Bilateral                             | Yes/No                                                                                                                                      | T0             |
| 8  | Mixed                                 | Yes/No                                                                                                                                      | T0             |
| 9  | Same Day Amputation and OI            | Yes/No                                                                                                                                      | T0/TS          |
| 10 | Cause of Amputation                   | Each cause assigned a number                                                                                                                | T0             |
| 11 | Date of amputation                    |                                                                                                                                             | T0             |
| 12 | Co-Morbidities                        | Each cause assigned a number                                                                                                                | T0             |
| 13 | Psychiatric evaluation before surgery | Yes/No                                                                                                                                      | T0             |
| 14 | Depression                            | Yes/No                                                                                                                                      | T0             |
| 15 | Alcohol >3/day                        | Yes/No                                                                                                                                      | T0             |
| 16 | TMR at index surgery                  | Yes/No                                                                                                                                      | T0             |
| 17 | Reasons for Osseointegration          | Fit Problems/ Skin Problems/ Painful prosthesis/Prosthetic Mobility Dissatisfaction/ Other Pain/ Other causes. Each cause assigned a number | T0             |
| 18 | Implant Details                       | Implant Brand, Type, Manufacture method, Collared/Flared, Width, Length                                                                     | TS             |
| 19 | Retention of Hardware                 | None/Cable/Screw/Both                                                                                                                       |                |
| 20 | Implant Removal                       |                                                                                                                                             | When it occurs |
| 21 | Reason for removal                    |                                                                                                                                             | When it occurs |
| 22 | Years to Fail                         |                                                                                                                                             | When it occurs |
| 23 | Re-implant date                       |                                                                                                                                             | When it occurs |
| 24 | Further surgeries details             | Washouts/Neurectomy/Refashioning/ Periprosthetic Fractures/Other Surgeries details                                                          | When it occurs |
| 25 | Antibiotics administration            | Intravenous/ Oral. Details                                                                                                                  | When it occurs |
| 26 | Other Adverse events                  |                                                                                                                                             | When it occurs |
| 27 | Length of Residuum                    |                                                                                                                                             | T0             |
| 28 | Length after OI                       |                                                                                                                                             | TS             |
| 29 | Pre-Op Weight Bearing status          |                                                                                                                                             | T0             |
| 30 | Pre-Op K Level                        |                                                                                                                                             | T0             |
| 31 | Pre-Op Walking Aid                    |                                                                                                                                             | T0             |
| 32 | Pre-Op 6 Minute Walk Test             |                                                                                                                                             | T0             |
| 33 | Pre-Op Timed Up-and-Go Test           |                                                                                                                                             | T0             |
| 34 | Pre-Op SF-36 (PCS)                    |                                                                                                                                             | T0             |
| 35 | Pre-Op SF-36 (MCS)                    |                                                                                                                                             | T0             |
| 36 | Pre-op Subjective                     | Functional Level and Problems. "How would you summarise your level of function with your current prosthesis?"                               | T0             |
| 37 | Pre-Op Stump Pain (VAS)               |                                                                                                                                             | T0             |
| 38 | Daily Prosthetic Wear Hours           |                                                                                                                                             | T0             |
| 39 | Prosthetic Wear Satisfaction          |                                                                                                                                             | T0             |

|                                                                                                                             |                                                                                                               |                   |
|-----------------------------------------------------------------------------------------------------------------------------|---------------------------------------------------------------------------------------------------------------|-------------------|
| Adherence to Rehabilitation Protocol                                                                                        | Yes/No                                                                                                        | TR                |
| Post-Op Weight Bearing status                                                                                               |                                                                                                               | T1, T2, T3, T4... |
| Post-Op K Level                                                                                                             |                                                                                                               | T1, T2, T3, T4... |
| Post-Op Walking Aid                                                                                                         |                                                                                                               | T1, T2, T3, T4... |
| Post-Op 6 Minute Walk Test                                                                                                  |                                                                                                               | T1, T2, T3, T4... |
| Post-Op Timed Up-and-Go Test                                                                                                |                                                                                                               | T1, T2, T3, T4... |
| Post-Op SF-36 (PCS)                                                                                                         |                                                                                                               | T1, T2, T3, T4... |
| Post-Op SF-36 (MCS)                                                                                                         |                                                                                                               | T1, T2, T3, T4... |
| Post-op Subjective                                                                                                          | Functional Level and Problems. "How would you summarise your level of function with your current prosthesis?" | T1, T2, T3, T4... |
| Post-Op Stump Pain (VAS)                                                                                                    |                                                                                                               | T1, T2, T3, T4... |
| Daily Prosthetic Wear Hours                                                                                                 |                                                                                                               | T1, T2, T3, T4... |
| Prosthetic Wear Satisfaction                                                                                                |                                                                                                               | T1, T2, T3, T4... |
| T0: Pre-operative, TS: At Surgery, TR: During Rehabilitation, T1: 3 months, T2: 6 months, T3: 1 year, T4: 2 years and so on |                                                                                                               |                   |

### Adverse events

Adverse events are reported which includes infection that require administration of intravenous or oral antibiotics or surgical intervention, periprosthetic fracture, implant breakage, aseptic loosening, need for revision surgery or additional amputation and death. Severity of infections are assessed and graded into Al Muderis et al. classification system.<sup>25</sup>

### Data analysis

The primary questions this study aim to identify are 1. the individual patient characteristics or factors that have a positive or negative influence in the outcomes measured or in other words who would be most or least benefitted with this novel procedure and who would be at a higher or lower risk of failure? and 2. what are the rates of additional intervention for patients undergoing transtibial osseointegration, and for what reasons? This project will also aim to collect data which can allow investigation of diverse questions regarding transtibial osseointegration as further insight develops.

The influence of various factors such as patient gender, age, and cause of amputation on dependent variables relating to potential risks (infection, fracture, further surgery, etc) or benefit (mobility, QOL outcomes, etc) will be assessed. Multivariable logistic regression will be performed with a focus to identify factors associated with further surgery, specifically for infection, periprosthetic fracture, implant fracture, and aseptic loosening. Additionally, factors associated with Daily prosthesis wear hours, Prosthetic wear satisfaction, SF-36 and mobility (6MWT, TUG, K level) will be evaluated. Separate regression models will be developed for short and long residuum TTOIs as well. A p value of  $\leq 0.05$  will be considered as significant. The p value for each regression identifying significant predictors of dependent variable outcome will be reported, as will the coefficients of relative influence of each variable.

1  
2  
3 The pre- versus post-operative continuous value data will be presented as mean and  
4 standard deviation and compared with Student's T-test or analysis of variance (ANOVA) if  
5 the data is normally distributed. Post-hoc analyses related to longitudinal data analysis at  
6 T0, T1, T2, etc will also be performed. Should the data not be normally distributed the  
7 median and interquartile ranges will be reported and comparison made using Wilcoxon test.  
8  
9

### 10 11 **Reducing risk of bias**

12  
13 In addition to reducing the risk of selection bias as described above, bias relating to surgeon  
14 expertise and protocol adherence is eliminated since all operations will be performed by a  
15 single primary surgeon. Bias related to data collection will be minimized by employing  
16 dedicated research assistants who will be unaware about details of patient demographic  
17 characteristics, surgical and implant details and previous recorded scores. Further, the  
18 results of functional outcome measures (6MWT, TUG, K-levels) depend on the patients'  
19 actual performance, while the results of subjective outcome measures are completely  
20 patient reported from surveys. In addition, the assessors will not be involved in data  
21 analysis.  
22  
23  
24  
25

### 26 27 **Patient and public involvement**

28 Patients or the public were not involved in the design, or conduct, or reporting, or  
29 dissemination plans of our research.  
30

### 31 32 **Ethics and Dissemination**

33 All patients included in this study will sign a consent form that provides sufficient  
34 information about the study for patients to make an informed decision about their  
35 participation. Outcomes of the current study will be disseminated by publications in peer-  
36 reviewed academic journals and presentations at relevant orthopaedic conferences.  
37  
38  
39  
40

### 41 42 **Discussion**

43  
44  
45 This study will be the first major one to focus on transtibial osseointegration only and will  
46 have the largest cohort reported in literature so far. The findings of the study would assess  
47 whether osseointegration in transtibial amputees is feasible in terms of risks and benefits  
48 and also make an important contribution to the otherwise limited literature regarding  
49 outcomes of osseointegration in lower extremity amputations. As evidenced by literature,  
50 transtibial amputees using TSP suffer from same difficulties involving skin breakdown<sup>8</sup>,  
51 suboptimal fit<sup>49</sup> and pain<sup>4</sup> as do the transfemoral ones, which ultimately affect their  
52 prosthetic use, mobility and overall quality of life. As the dramatically different concept of  
53 osseointegration proved life-changing in management of transfemoral amputees with  
54 established safety, it is only logical to extend the science to transtibial amputees and  
55 document the outcomes.  
56  
57  
58  
59  
60



1  
2  
3 The challenges posed by TSP were overcome by direct anchorage of the implant to the bone  
4 that enabled physiological weight bearing<sup>17</sup>, increased flexibility and range of motion<sup>50</sup>,  
5 sitting comfort<sup>51</sup>, mechanoreception-based sensory feedback (osseoperception)<sup>23</sup>, improved  
6 donning and doffing<sup>24</sup>, better mobility<sup>7</sup> and improved prosthetic use<sup>24</sup>, body image<sup>49</sup> and  
7 quality of life<sup>24</sup>. The safety of the implant was established in subsequent studies in terms of  
8 stability and risk of infection.<sup>25</sup>  
9  
10

11  
12 Although largely unreported in literature so far, the further application of osseointegration  
13 to transtibial amputees has been done in pilot project by our group to suitable patients as  
14 well as some other surgeons worldwide. Prospective outcomes at 12 months of five patients  
15 with peripheral vascular disease who underwent transtibial osseointegration was published  
16 recently by Al Muderis et al.<sup>43</sup> Results showed that all the patients enrolled in the study  
17 were able to mobilize unaided at final follow-up. There was notable improvement of  
18 objective functional measures of 6MWT and TUG as well as subjective functional measures,  
19 while only two superficial infections were noted which resolved with conservative  
20 treatment and no implant loosening or other adverse event documented. However, two  
21 previous studies from Germany<sup>26, 28</sup> reporting on nine individuals with transtibial  
22 amputations treated with their custom cobalt chrome implants reported an explantation  
23 rate of 43% and rates of both septic and aseptic loosening of 22% each, though patient  
24 eligibility, rehabilitation and follow-up is unclear.  
25  
26  
27  
28  
29  
30

31  
32 Recently, another study comprising of a small number of nine transtibial patients having a  
33 follow-up of only 12 months has been reported from The Netherlands.<sup>44</sup> The cohort was a  
34 mixed one with majority (31 patients) being transfemoral patients. Comparison of outcomes  
35 between transtibial and transfemoral osseointegrated patients revealed higher overall  
36 baseline values in transtibial patients except walking distance in daily life and prosthetic  
37 comfort. Improvement in the outcome measures was also greater in transtibial patients  
38 (except hip abductor strength and prosthesis wearing time), and at final follow-up lesser  
39 transtibial patients experienced stump pain as compared to transfemoral patients  
40 (transfemoral: 20/31 (65%), transtibial: 2/9 (22%)). Major adverse events related to  
41 implants was recorded as 8% which included both groups and included three dual-cone  
42 breakages and four bone fractures (due to fall), which were all managed successfully.  
43 However, a lower uneventful course was noted in transtibial patients (44%) compared to  
44 transfemoral ones (61%). The authors concluded that transtibial osseointegration was both  
45 efficacious and safe at 12 months follow-up  
46  
47  
48  
49  
50

51  
52 Thus, the proposed study would comprise the largest cohort of Transtibial amputees  
53 undergoing Osseointegration with a substantial follow-up time. The clinical outcomes,  
54 adverse events, and their associations noted in this study would help considerably to set the  
55 standard of care in transtibial amputee patients and provide directions of further research  
56 in terms of implant design, surgical technique, rehabilitation or management of  
57 complications.  
58  
59  
60

## References

1. Hagberg K, Branemark R. Consequences of non-vascular trans-femoral amputation: a survey of quality of life, prosthetic use and problems. *Prosthetics and orthotics international*. 2001;25(3):186-94.
2. Hoyt BW, Walsh SA, Forsberg JA. Osseointegrated prostheses for the rehabilitation of amputees (OPRA): results and clinical perspective. *Expert review of medical devices*. 2020;17(1):17-25.
3. Thurston AJ. Pare and prosthetics: the early history of artificial limbs. *ANZ J Surg*. 2007;77(12):1114-9.
4. Zaid MB, O'Donnell RJ, Potter BK, Forsberg JA. Orthopaedic Osseointegration: State of the Art. *The Journal of the American Academy of Orthopaedic Surgeons*. 2019;27(22):e977-e85.
5. Demet K, Martinet N, Guillemin F, Paysant J, Andre JM. Health related quality of life and related factors in 539 persons with amputation of upper and lower limb. *Disability and rehabilitation*. 2003;25(9):480-6.
6. Marx RG, Wilson SM, Swiontkowski MF. Updating the assignment of levels of evidence. *The Journal of bone and joint surgery American volume*. 2015;97(1):1-2.
7. Van de Meent H, Hopman MT, Frolke JP. Walking ability and quality of life in subjects with transfemoral amputation: a comparison of osseointegration with socket prostheses. *Archives of physical medicine and rehabilitation*. 2013;94(11):2174-8.
8. Dudek NL, Marks MB, Marshall SC, Chardon JP. Dermatologic conditions associated with use of a lower-extremity prosthesis. *Archives of physical medicine and rehabilitation*. 2005;86(4):659-63.
9. Ghoseiri K, Safari MR. Prevalence of heat and perspiration discomfort inside prostheses: literature review. *Journal of rehabilitation research and development*. 2014;51(6):855-68.
10. Lyon CC, Kulkarni J, Zimerson E, Van Ross E, Beck MH. Skin disorders in amputees. *Journal of the American Academy of Dermatology*. 2000;42(3):501-7.
11. Meulenbelt HE, Geertzen JH, Jonkman MF, Dijkstra PU. Determinants of skin problems of the stump in lower-limb amputees. *Archives of physical medicine and rehabilitation*. 2009;90(1):74-81.
12. Al Muderis MM, Lu WY, Li JJ, Kaufman K, Orendurff M, Highsmith MJ, et al. Clinically Relevant Outcome Measures Following Limb Osseointegration; Systematic Review of the Literature. *Journal of orthopaedic trauma*. 2018;32(2):e64-e75.
13. Hunter SW, Batchelor F, Hill KD, Hill AM, Mackintosh S, Payne M. Risk Factors for Falls in People With a Lower Limb Amputation: A Systematic Review. *Pm&R*. 2017;9(2):170-80.
14. Leijendekkers RA, van Hinte G, Frolke JP, van de Meent H, Nijhuis-van der Sanden MW, Staal JB. Comparison of bone-anchored prostheses and socket prostheses for patients with a lower extremity amputation: a systematic review. *Disability and rehabilitation*. 2017;39(11):1045-58.
15. Amtmann D, Morgan SJ, Kim J, Hafner BJ. Health-related profiles of people with lower limb loss. *Archives of physical medicine and rehabilitation*. 2015;96(8):1474-83.
16. Li Y, Branemark R. Osseointegrated prostheses for rehabilitation following amputation : The pioneering Swedish model. *Der Unfallchirurg*. 2017;120(4):285-92.
17. Overmann AL, Aparicio C, Richards JT, Mutreja I, Fischer NG, Wade SM, et al. Orthopaedic Osseointegration: Implantology and Future Directions. *Journal of orthopaedic research : official publication of the Orthopaedic Research Society*. 2019.
18. Adell R, Eriksson B, Lekholm U, Branemark PI, Jemt T. Long-term follow-up study of osseointegrated implants in the treatment of totally edentulous jaws. *Int J Oral Maxillofac Implants*. 1990;5(4):347-59.
19. Branemark PI, Adell R, Albrektsson T, Lekholm U, Lundkvist S, Rockler B. Osseointegrated titanium fixtures in the treatment of edentulousness. *Biomaterials*. 1983;4(1):25-8.

20. Branemark PI, Hansson BO, Adell R, Breine U, Lindstrom J, Hallen O, et al. Osseointegrated implants in the treatment of the edentulous jaw. Experience from a 10-year period. *Scand J Plast Reconstr Surg Suppl.* 1977;16:1-132.
21. Branemark R, Branemark PI, Rydevik B, Myers RR. Osseointegration in skeletal reconstruction and rehabilitation: a review. *Journal of rehabilitation research and development.* 2001;38(2):175-81.
22. Hagberg K, Hansson E, Branemark R. Outcome of percutaneous osseointegrated prostheses for patients with unilateral transfemoral amputation at two-year follow-up. *Archives of physical medicine and rehabilitation.* 2014;95(11):2120-7.
23. Hagberg K, Häggström E, Jönsson S, Rydevik B, Brånemark R. Osseoperception and Osseointegrated Prosthetic Limbs. 2008:131-40.
24. Hagberg K, Branemark R, Gunterberg B, Rydevik B. Osseointegrated trans-femoral amputation prostheses: prospective results of general and condition-specific quality of life in 18 patients at 2-year follow-up. *Prosthetics and orthotics international.* 2008;32(1):29-41.
25. Al Muderis M, Khemka A, Lord SJ, Van de Meent H, Frolke JP. Safety of Osseointegrated Implants for Transfemoral Amputees: A Two-Center Prospective Cohort Study. *The Journal of bone and joint surgery American volume.* 2016;98(11):900-9.
26. Aschoff HH, Juhnke DL. [Endo-exo prostheses : Osseointegrated percutaneously channeled implants for rehabilitation after limb amputation]. *Der Unfallchirurg.* 2016;119(5):421-7.
27. Branemark R, Berlin O, Hagberg K, Bergh P, Gunterberg B, Rydevik B. A novel osseointegrated percutaneous prosthetic system for the treatment of patients with transfemoral amputation: A prospective study of 51 patients. *The bone & joint journal.* 2014;96-B(1):106-13.
28. Juhnke DL, Aschoff HH. [Endo-exo prostheses following limb-amputation]. *Der Orthopade.* 2015;44(6):419-25.
29. Juhnke DL, Beck JP, Jeyapalina S, Aschoff HH. Fifteen years of experience with Integral-Leg-Prosthesis: Cohort study of artificial limb attachment system. *Journal of rehabilitation research and development.* 2015;52(4):407-20.
30. Muderis MA, Tetsworth K, Khemka A, Wilmot S, Bosley B, Lord SJ, et al. The Osseointegration Group of Australia Accelerated Protocol (OGAAP-1) for two-stage osseointegrated reconstruction of amputated limbs. *The bone & joint journal.* 2016;98-B(7):952-60.
31. Tillander J, Hagberg K, Berlin O, Hagberg L, Branemark R. Osteomyelitis Risk in Patients With Transfemoral Amputations Treated With Osseointegration Prostheses. *Clinical orthopaedics and related research.* 2017;475(12):3100-8.
32. Dougherty PJ. Transtibial amputees from the Vietnam War. Twenty-eight-year follow-up. *The Journal of bone and joint surgery American volume.* 2001;83(3):383-9.
33. Harness N, Pinzur MS. Health related quality of life in patients with dysvascular transtibial amputation. *Clinical orthopaedics and related research.* 2001(383):204-7.
34. Knezevic A, Salamon T, Milankov M, Ninkovic S, Jeremic Knezevic M, Tomasevic Todorovic S. Assessment of Quality of Life in Patients after Lower Limb Amputation. *Med Pregl.* 2015;68(3-4):103-8.
35. Dillingham TR, Pezzin LE, MacKenzie EJ. Limb amputation and limb deficiency: epidemiology and recent trends in the United States. *Southern medical journal.* 2002;95(8):875-83.
36. Ziegler-Graham K, MacKenzie EJ, Ephraim PL, Travison TG, Brookmeyer R. Estimating the prevalence of limb loss in the United States: 2005 to 2050. *Archives of physical medicine and rehabilitation.* 2008;89(3):422-9.
37. Walker CR, Ingram RR, Hullin MG, McCreath SW. Lower limb amputation following injury: a survey of long-term functional outcome. *Injury.* 1994;25(6):387-92.
38. Hoaglund FT, Jergesen HE, Wilson L, Lamoreux LW, Roberts R. Evaluation of problems and needs of veteran lower-limb amputees in the San Francisco Bay Area during the period 1977-1980. *J Rehabil R D.* 1983;20(1):57-71.

- 1  
2  
3 39. Behr J, Friedly J, Molton I, Morgenroth D, Jensen MP, Smith DG. Pain and pain-related  
4 interference in adults with lower-limb amputation: comparison of knee-disarticulation, transtibial,  
5 and transfemoral surgical sites. *Journal of rehabilitation research and development*. 2009;46(7):963-  
6 72.  
7  
8 40. Dillingham TR, Pezzin LE, MacKenzie EJ, Burgess AR. Use and satisfaction with prosthetic  
9 devices among persons with trauma-related amputations: a long-term outcome study. *Am J Phys  
10 Med Rehabil*. 2001;80(8):563-71.  
11 41. Pezzin LE, Dillingham TR, Mackenzie EJ, Ephraim P, Rossbach P. Use and satisfaction with  
12 prosthetic limb devices and related services. *Archives of physical medicine and rehabilitation*.  
13 2004;85(5):723-9.  
14 42. Butler K, Bowen C, Hughes AM, Torah R, Ayala I, Tudor J, et al. A systematic review of the  
15 key factors affecting tissue viability and rehabilitation outcomes of the residual limb in lower  
16 extremity traumatic amputees. *Journal of tissue viability*. 2014;23(3):81-93.  
17 43. Atallah R, Li JJ, Lu W, Leijendekkers R, Frolke JP, Al Muderis M. Osseointegrated Transtibial  
18 Implants in Patients with Peripheral Vascular Disease: A Multicenter Case Series of 5 Patients with 1-  
19 Year Follow-up. *The Journal of bone and joint surgery American volume*. 2017;99(18):1516-23.  
20 44. Leijendekkers RA, van Hinte G, Frolke JP, van de Meent H, Atsma F, Nijhuis-van der Sanden  
21 MW, et al. Functional performance and safety of bone-anchored prostheses in persons with a  
22 transfemoral or transtibial amputation: a prospective one-year follow-up cohort study. *Clinical  
23 rehabilitation*. 2019;33(3):450-64.  
24 45. Lin SJ, Bose NH. Six-minute walk test in persons with transtibial amputation. *Archives of  
25 physical medicine and rehabilitation*. 2008;89(12):2354-9.  
26 46. Schoppen T, Boonstra A, Groothoff JW, de Vries J, Goeken LN, Eisma WH. The Timed "up and  
27 go" test: reliability and validity in persons with unilateral lower limb amputation. *Archives of physical  
28 medicine and rehabilitation*. 1999;80(7):825-8.  
29 47. Al Muderis M, Lu W, Tetsworth K, Bosley B, Li JJ. Single-stage osseointegrated reconstruction  
30 and rehabilitation of lower limb amputees: the Osseointegration Group of Australia Accelerated  
31 Protocol-2 (OGAAP-2) for a prospective cohort study. *BMJ open*. 2017;7(3):e013508.  
32 48. Ware JE, Jr., Sherbourne CD. The MOS 36-item short-form health survey (SF-36). I.  
33 Conceptual framework and item selection. *Medical care*. 1992;30(6):473-83.  
34 49. Muderis MA, Lu W, Glatt V, Tetsworth K. Two-Stage Osseointegrated Reconstruction of Post-  
35 traumatic Unilateral Transfemoral Amputees. *Military medicine*. 2018;183(suppl\_1):496-502.  
36 50. Tranberg R, Zugner R, Karrholm J. Improvements in hip- and pelvic motion for patients with  
37 osseointegrated trans-femoral prostheses. *Gait & posture*. 2011;33(2):165-8.  
38 51. Hagberg K, Haggstrom E, Uden M, Branemark R. Socket versus bone-anchored trans-femoral  
39 prostheses: hip range of motion and sitting comfort. *Prosthetics and orthotics international*.  
40 2005;29(2):153-63.  
41  
42  
43  
44

## 45 Figure Captions

46  
47  
48 Figure 1: The Standard Implant for longer residuums. The parts include: 1, proximal cap  
49 screw. 2, Intramedullary body. 3, internal safety screw. 4, dual cone transcuteaneous  
50 abutment adapter. 5, permanent locking propeller screw. 6, proximal connector. 7,  
51 prosthetic connector.  
52

53  
54 Figure 2: Targeted re-innervation of nerves (posterior tibial nerve highlighted) to  
55 surrounding muscular branches  
56

57  
58 Figure 3: Reaming was done for longer residuums to 0.5 mm more than the diameter of  
59 implant expected to be used  
60

1  
2  
3 Figure 4: Broaching done under Image Intensifier guidance upto the desired size of implant  
4 for longer residuums  
5

6  
7 Figure 5: Face reaming done to smoothen the distal margins of the tibial stump  
8

9 Figure 6: Final implantation of the definite intra-medullary component  
10

11 Figure 7: Closure of periosteum around the stump in a 'purse-string' fashion and the flaps  
12 around implant in 'fish-mouth' manner.  
13

14  
15 Figure 8: Attachment of extra-medullary components  
16

17 Figure 9: Final view of the closure of the stump  
18

19 Figure 10: Transtibial Osseointegration Rehabilitation Protocol  
20

21 Figure 11: Transtibial Osseointegration Physiotherapy Protocol  
22

23  
24 Figure 12: After fitting of prosthetic limb in a short residuum tibia  
25

#### 26 **AUTHORS' CONTRIBUTIONS**

27  
28 R Haque: Study design; patient care and surgical team; manuscript preparation.

29 S Al-Jawazneh: Data collection; patient care and surgical team

30 J Hoellwarth: Data collection; patient care and surgical team

31 M A Akhtar: Data collection; patient care and surgical team

32 K Doshi: Data collection; patient care and surgical team

33 Y Tan: Data collection, statistical evaluation

34 W. Lu: Data collection; manuscript preparation.

35 C Roberts: Patient care; data collection; manuscript preparation.

36 M Al Muderis: Study design; patient care and surgical procedure; manuscript preparation.  
37

#### 38 **Acknowledgement**

39  
40 Bidget Dean: For formulating Transtibial Rehabilitation and Physiotherapy Protocol  
41

#### 42 **FUNDING STATEMENT**

43  
44 This research received no specific grant from any funding agency in the public, commercial or  
45 not-for-profit sectors.  
46

#### 47 **COMPETING INTERESTS STATEMENT**

48  
49 M. Al Muderis receives royalties for design contributions for the Osseointegrated Prosthetic  
50 Limb (OPL; Permedica s.p.a; Milan, Italy) implant system. All other authors listed in this  
51 study declare no competing interests.  
52  
53  
54  
55  
56  
57  
58  
59  
60



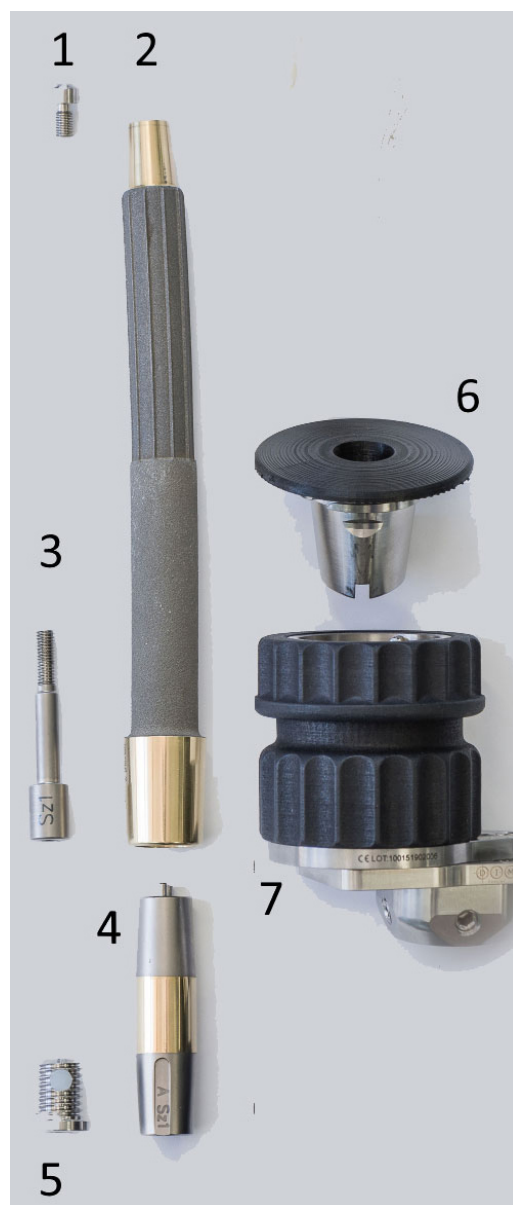

The Standard Implant for longer residuums. The parts include: 1, proximal cap screw. 2, Intramedullary body. 3, internal safety screw. 4, dual cone transcutaneous abutment adapter. 5, permanent locking propeller screw. 6, proximal connector. 7, prosthetic connector.

21x49mm (600 x 600 DPI)

1  
2  
3  
4  
5  
6  
7  
8  
9  
10  
11  
12  
13  
14  
15  
16  
17  
18  
19  
20  
21  
22  
23  
24  
25  
26  
27  
28  
29  
30  
31  
32  
33  
34  
35  
36  
37  
38  
39  
40  
41  
42  
43  
44  
45  
46  
47  
48  
49  
50  
51  
52  
53  
54  
55  
56  
57  
58  
59  
60

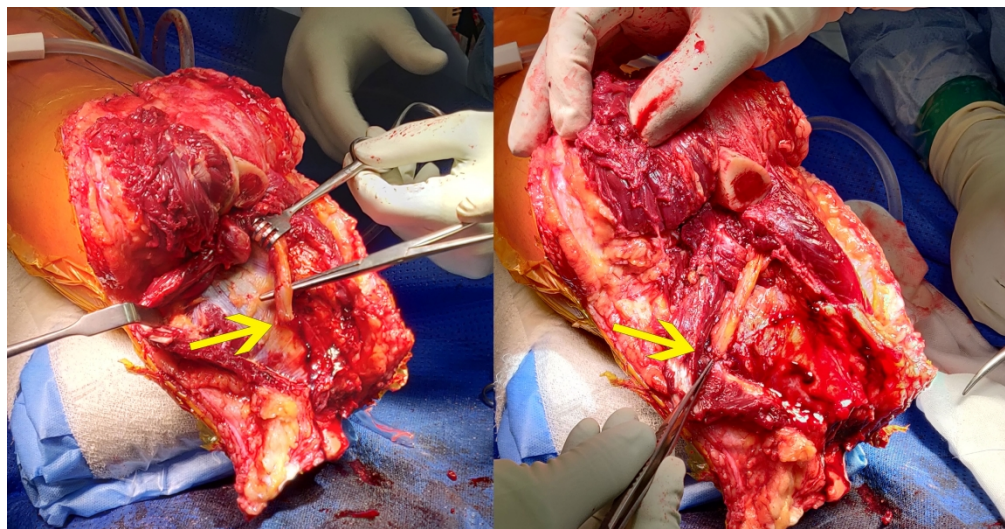

Targeted re-innervation of nerves (posterior tibial nerve highlighted) to surrounding muscular branches

327x171mm (300 x 300 DPI)

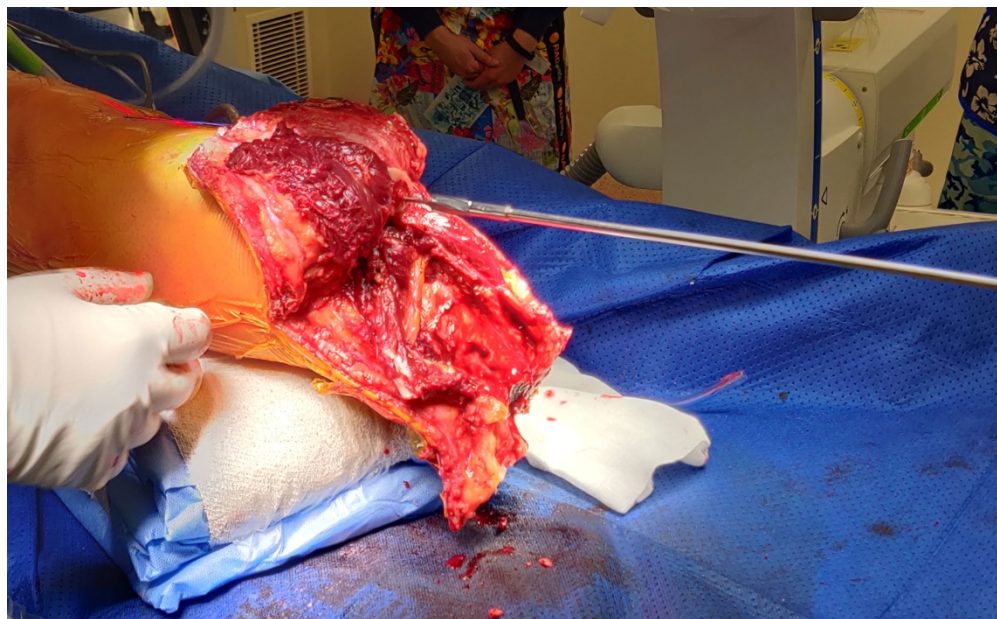

Reaming was done for longer residuums to 0.5 mm more than the diameter of implant expected to be used

195x119mm (300 x 300 DPI)



1  
2  
3  
4  
5  
6  
7  
8  
9  
10  
11  
12  
13  
14  
15  
16  
17  
18  
19  
20  
21  
22  
23  
24  
25  
26  
27  
28  
29  
30  
31  
32  
33  
34  
35  
36  
37  
38  
39  
40  
41  
42  
43  
44  
45  
46  
47  
48  
49  
50  
51  
52  
53  
54  
55  
56  
57  
58  
59  
60

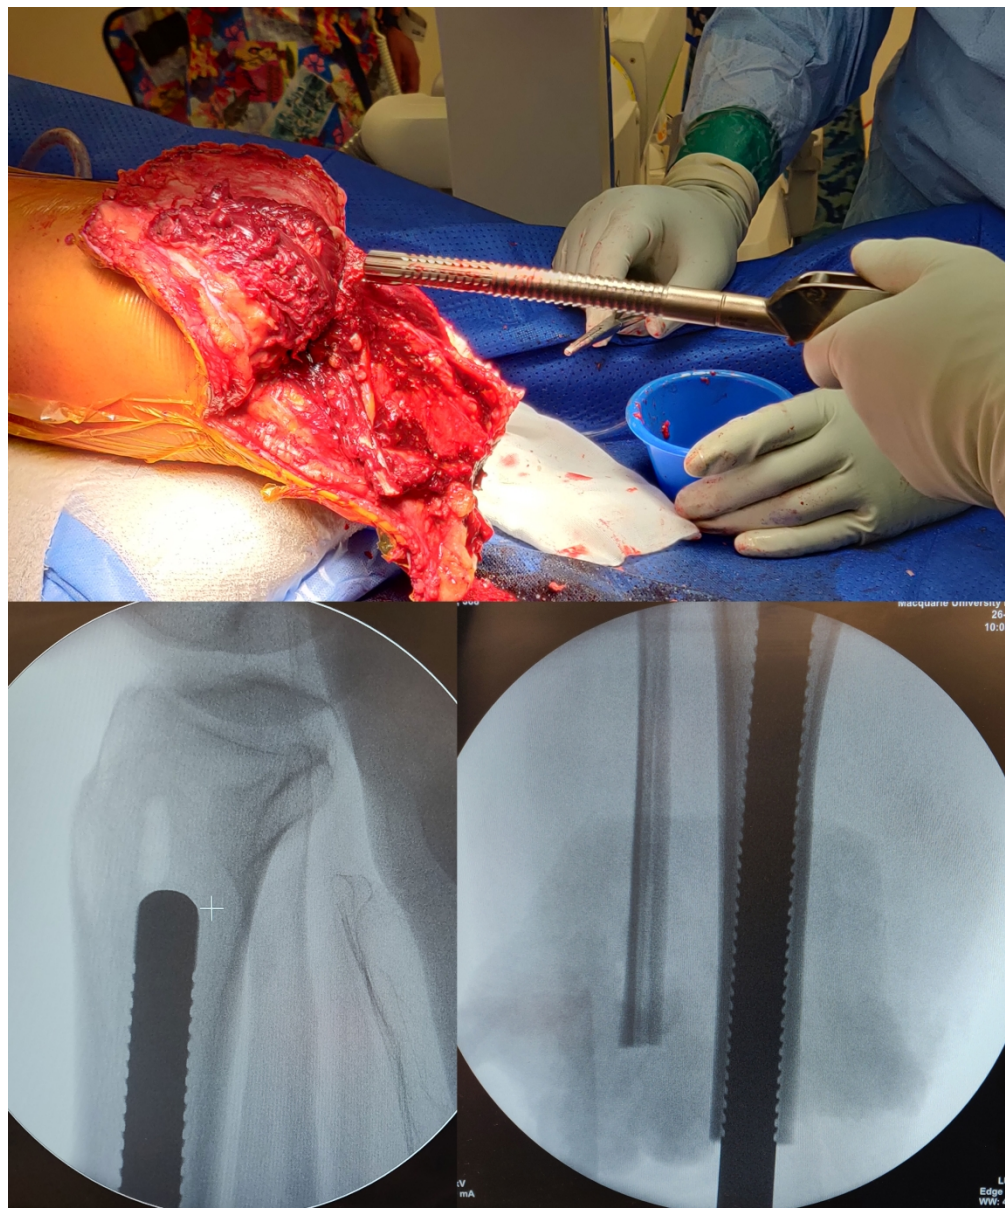

Broaching done under Image Intensifier guidance upto the desired size of implant for longer residuums  
325x390mm (300 x 300 DPI)

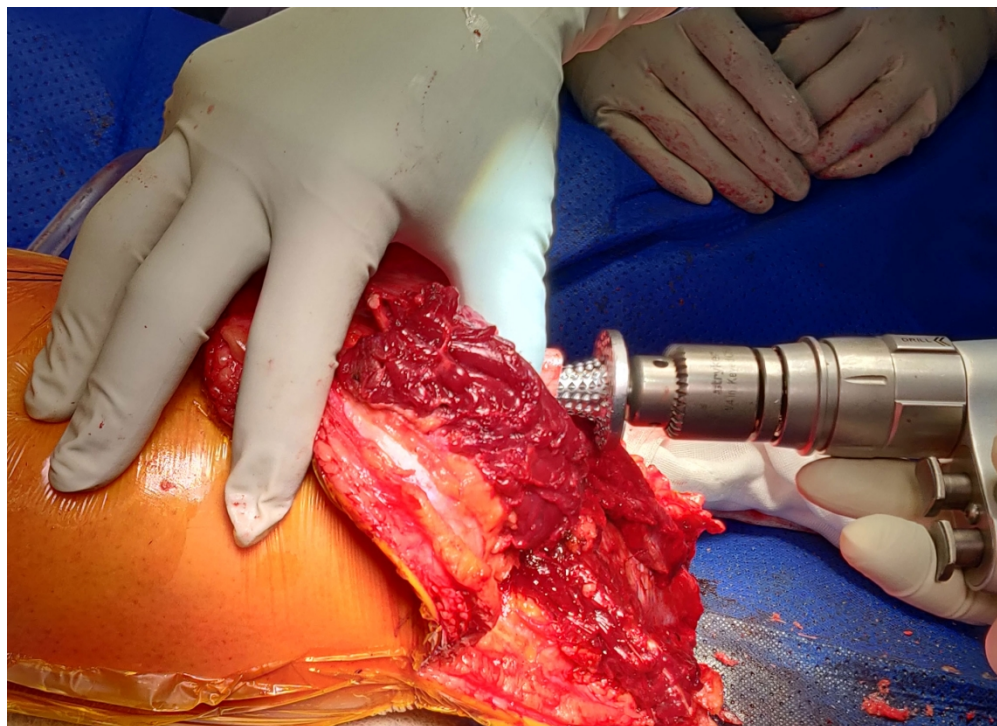

Face reaming done to smoothen the distal margins of the tibial stump

173x125mm (300 x 300 DPI)

1  
2  
3  
4  
5  
6  
7  
8  
9  
10  
11  
12  
13  
14  
15  
16  
17  
18  
19  
20  
21  
22  
23  
24  
25  
26  
27  
28  
29  
30  
31  
32  
33  
34  
35  
36  
37  
38  
39  
40  
41  
42  
43  
44  
45  
46  
47  
48  
49  
50  
51  
52  
53  
54  
55  
56  
57  
58  
59  
60

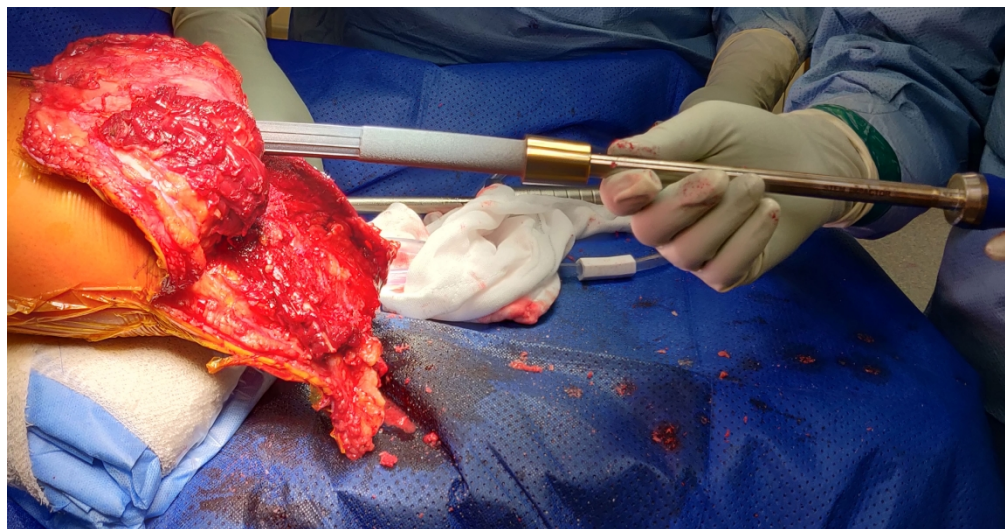

Final implantation of the definite intra-medullary component  
252x132mm (300 x 300 DPI)





Closure of periosteum around the stump in a 'purse-string' fashion and the flaps around implant in 'fish-mouth' manner

208x85mm (300 x 300 DPI)

1  
2  
3  
4  
5  
6  
7  
8  
9  
10  
11  
12  
13  
14  
15  
16  
17  
18  
19  
20  
21  
22  
23  
24  
25  
26  
27  
28  
29  
30  
31  
32  
33  
34  
35  
36  
37  
38  
39  
40  
41  
42  
43  
44  
45  
46  
47  
48  
49  
50  
51  
52  
53  
54  
55  
56  
57  
58  
59  
60

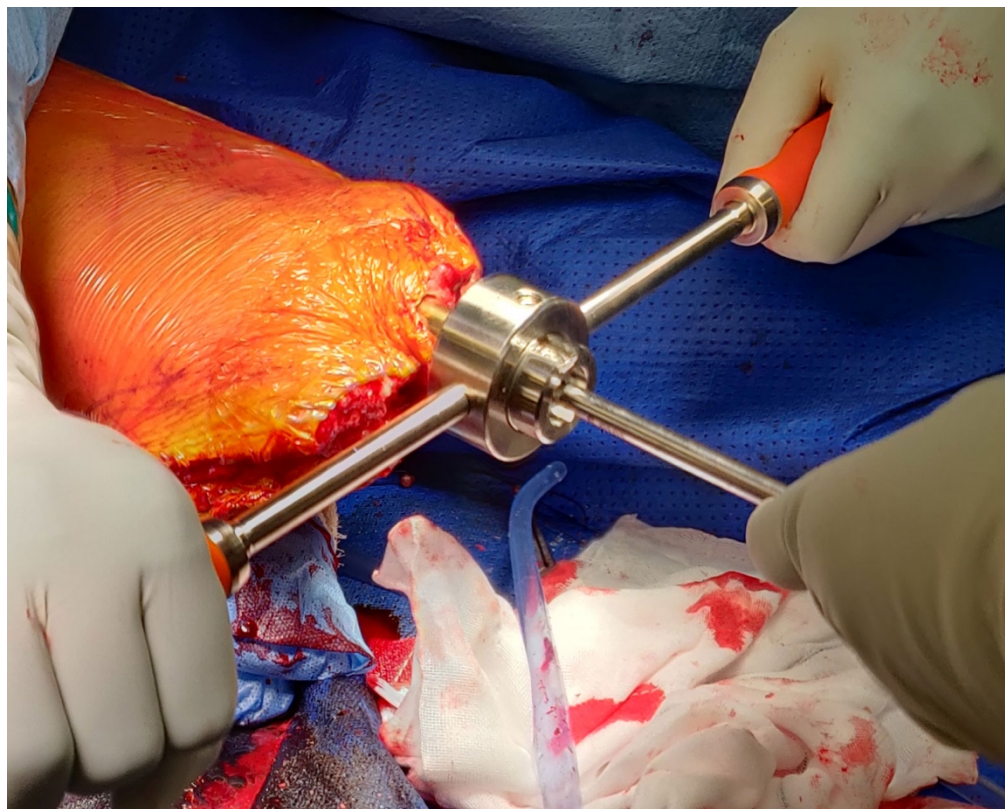

Attachment of extra-medullary components

132x106mm (300 x 300 DPI)

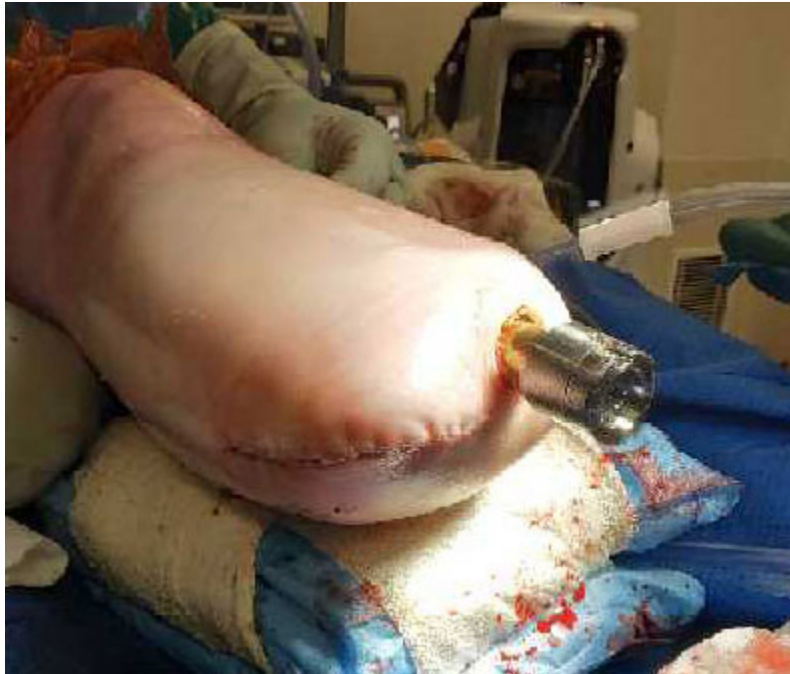

Final view of the closure of the stump

33x28mm (300 x 300 DPI)

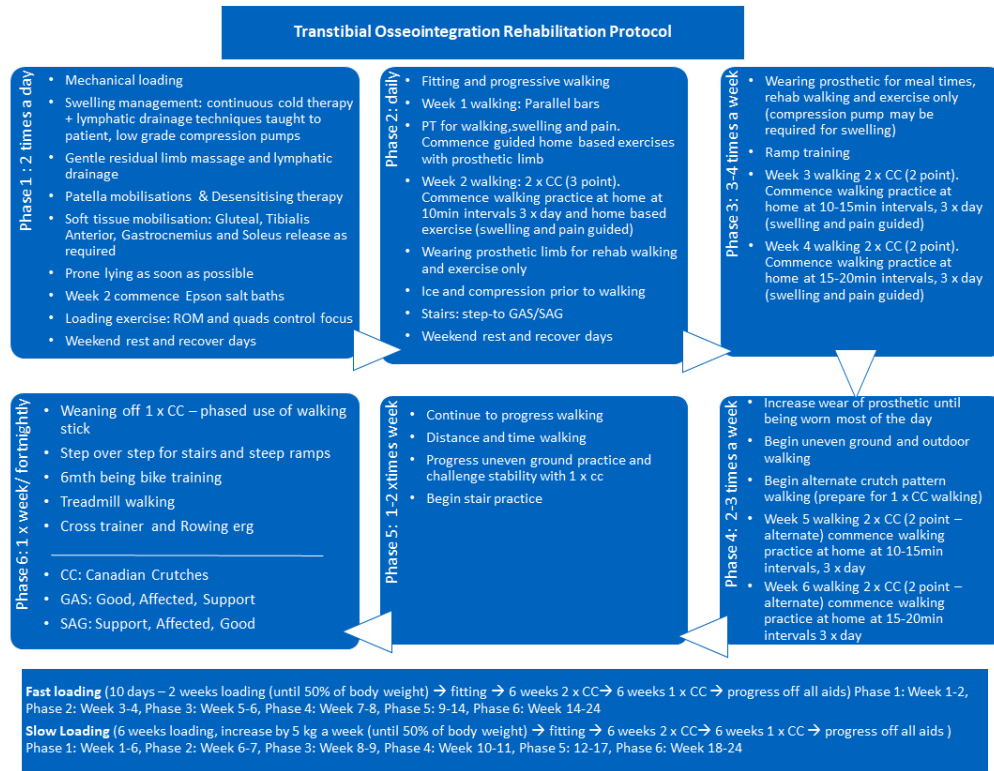

### Transtibial Osseointegration Rehabilitation Protocol

45x34mm (600 x 600 DPI)

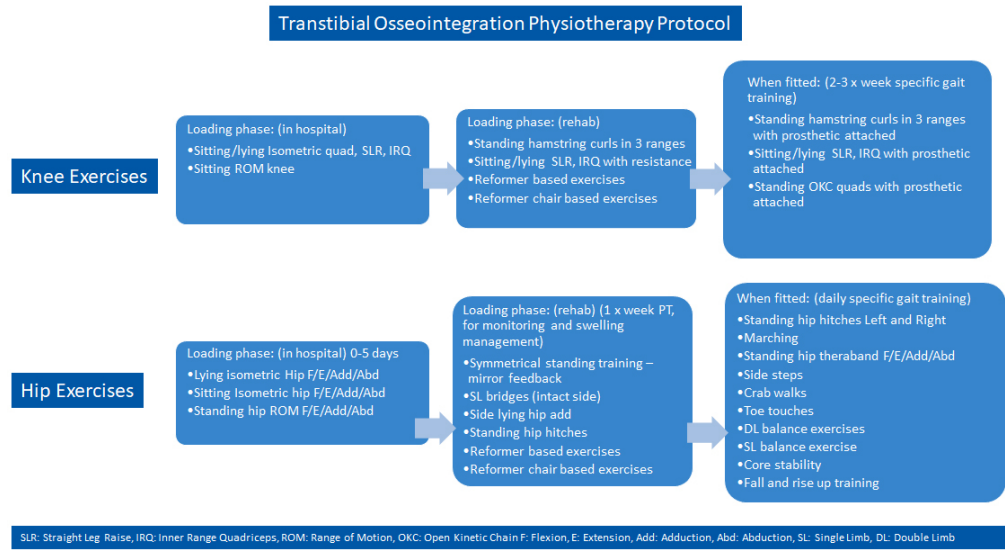

Transtibial Osseointegration Physiotherapy Protocol

47x25mm (600 x 600 DPI)



1  
2  
3  
4  
5  
6  
7  
8  
9  
10  
11  
12  
13  
14  
15  
16  
17  
18  
19  
20  
21  
22  
23  
24  
25  
26  
27  
28  
29  
30  
31  
32  
33  
34  
35  
36  
37  
38  
39  
40  
41  
42  
43  
44  
45  
46  
47  
48  
49  
50  
51  
52  
53  
54  
55  
56  
57  
58  
59  
60

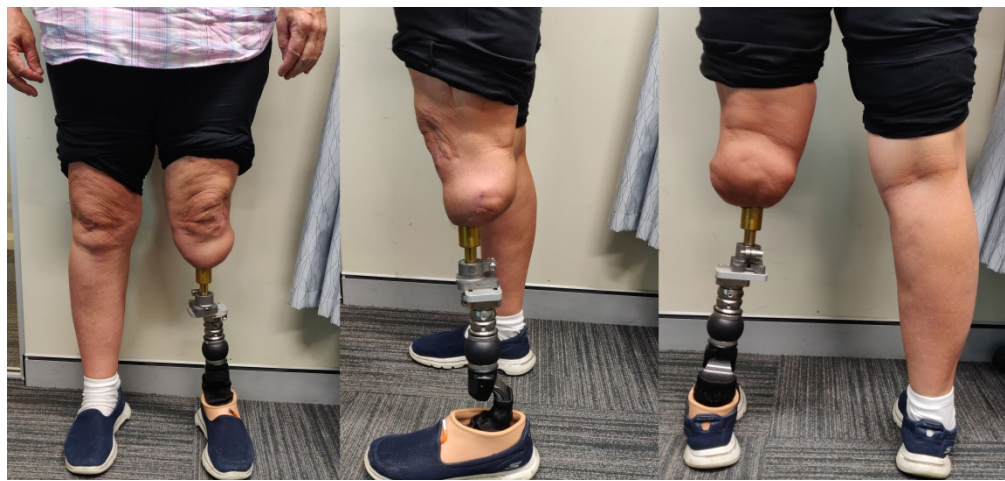

After fitting of prosthetic limb in a short residuum tibia  
580x274mm (300 x 300 DPI)
